# Supplementary material for: Knowledge about cervical cancer and awareness about human papillomavirus vaccination among medical students in Jordan
Source: PeerJ. 2021 Jun 17;9:e11611. doi: 10.7717/peerj.11611 (PMC8214844; doi:10.7717/peerj.11611)
Supplement: Supplemental Information 1 [file peerj-09-11611-s001.xlsx]

## Sheet: Data
Time	Your participation in completing this survey is highly appreciated.	Medical students	University :	Gender	Age	Level	Family Income(monthly) :	Place of living :	Nationality	Do you know someone with cervical cancer?	Residence:	1. Is Cervical cancer the leading cause amongst gynecological cancer?	2. The cause of cervical cancer is	3. Risk factors of cervical cancer is/are: (CHOOSE as many as applies)	4. Clinical features of cervical cancer include/s: (CHOOSE as many as applies)	5. According to WHO, women aged 25-44 years should be screened every:	6. According to WHO, women aged 45-60 years should be screened every:	7. Does the vaccine protect against all cervical cancer?	8. Is there a vaccine to protect from cervical cancer?	9. Girls who have been vaccinated will need to attend for cervical cancer screening	10. Is HPV responsible for a wide range of diseases including cervical cancer?	11. HPV is transmitted by:	12. The Technique available for HPV detection: (CHOOSE as many as applies)	13. HPV subtypes 6 and 11 are commonly associated with:	14. HPV subtypes 16 and 18 are commonly associated with:	1.Is the HPV vaccine available in Jordan?	2.Which age group HPV vaccine should be given?	3.Can HP vaccine be given to boys?	4.Do girls/women need to be screened for HPV before getting vaccinated?	5.Can HP vaccine be given to a woman already having HPV infection?	6.How many doses of HPV vaccine are required for protection?	7.Cervical cancer protection provided by HPV vaccine is:	8.Is it necessary to introduce HPV vaccine in schoolgirls in Jordan?	9.What do you think will be the most important obstacle preventing yourself to receive/advice HPV vaccination? (CHOOSE as many as applies)	10. What are your sources of knowledge and information on HPV vaccination? (CHOOSE as many as applies
2019-12-15 19:36:50	Agree	Yes	Yarmouk University	Male	22	5th years	Less than 500	Urban	Jordanian	No	Irbid	No	Infection	Multiple sexual partners, Infection with HPV, Early age of first coitus, Smoking, Family history of the disease	No symptoms, Lower abdominal pain, Bleeding per vagina, Discharge per vagina, Post coital bleeding (spotting or bleeding unrelated to menstruation that occurs during or after sexual intercourse)	3 Years	3Years	No	Yes	Yes	Yes	Sexual	Blood test, Pap smear, PCR (Polymerase chain reaction)	Genital warts	Cervical carcinoma	Yes	11-29 Years	Yes	No	Don't know	Three	Don't know	No	high cost	Medical school teachings, Books, Social media, Internet
2019-12-15 19:46:52	Agree	Yes	Yarmouk University	Female	22	5th years	501- 1000	Urban	Jordanian	No	Irbid	Yes	Genetic	Family history of the disease	Post coital bleeding (spotting or bleeding unrelated to menstruation that occurs during or after sexual intercourse)	5 Years	2 Years	No	No	Yes	Yes	Sexual	Pap smear	Don't know	Don't know	Yes	0-10 Years	Yes	Yes	No	Three	Don't know	Yes	Worry about efficacy of vaccine	Internet
2019-12-15 19:47:19	Agree	Yes	Yarmouk University	Male	22	5th years	More than 2000	Urban	Jordanian	No	Irbid	Yes	Environmental	Multiple sexual partners, Infection with HPV, Early age of first coitus, Smoking, Family history of the disease, Contraception (Intrauterine device/oral contraceptives)	Bleeding per vagina, Discharge per vagina, Menstrual problems, Weight loss, Swelling of cervix, Post coital bleeding (spotting or bleeding unrelated to menstruation that occurs during or after sexual intercourse), Anemia	3 Years	5 Years	Yes	Yes	Yes	Yes	Sexual	Pap smear, PCR (Polymerase chain reaction), Biopsy	Genital warts	Cervical carcinoma	Don't know	11-29 Years	Yes	Yes	Don't know	Don't know	Don't know	Yes	Inadequate information	Medical school teachings
2019-12-15 19:48:08	Agree	Yes	Yarmouk University	Female	22	5th years	1500 - 2000	Rural	Jordanian	No	Almafrq	Yes	Infection	Multiple sexual partners, Infection with HPV, Poor hygiene, Early age of first coitus, Family history of the disease	Bleeding per vagina, Discharge per vagina, Itching, Weight loss, Swelling of cervix, Post coital bleeding (spotting or bleeding unrelated to menstruation that occurs during or after sexual intercourse)	2 Years	5 Years	No	Yes	Yes	Yes	Sexual	Pap smear	Cervical carcinoma	Genital warts	Yes	30-50 Years	Yes	No	Don't know	Don't know	Don't know	Don't know	Inadequate information	Medical school teachings
2019-12-15 19:48:17	Agree	Yes	Yarmouk University	Female	22	5th years	More than 2000	Urban	Jordanian	No	Irbid	Yes	Infection	Infection with HPV, Old age	No symptoms, Bleeding per vagina, Discharge per vagina, Menstrual problems, Weight loss	Don't know	Don't know	No	Yes	No	Yes	Sexual	Pap smear, PCR (Polymerase chain reaction), Biopsy	Genital warts	Cervical carcinoma	Don't know	11-29 Years	Yes	No	No	Three	0.7	Yes	Worry about efficacy of vaccine	Medical school teachings, Internet
2019-12-15 19:48:31	Agree	Yes	Yarmouk University	Male	22	5th years	1001 - 1499	Urban	Jordanian	No	Irbid	Yes	Genetic	Multiple sexual partners, Infection with HPV, Early age of first coitus, Smoking, Family history of the disease, Nulliparity (Never married)	Bleeding per vagina, Menstrual problems, Weight loss, Post coital bleeding (spotting or bleeding unrelated to menstruation that occurs during or after sexual intercourse), Anemia	5 Years	2 Years	No	Yes	Yes	Yes	Sexual	Pap smear	Plantar warts	Genital warts	Yes	0-10 Years	Yes	No	Yes	Three	Don't know	Yes	high cost, Worry about complications, Worry about efficacy of vaccine, Inadequate information	Medical school teachings
2019-12-15 19:48:49	Agree	Yes	Yarmouk University	Female	22	5th years	More than 2000	Urban	Jordanian	No	Amman	No	Infection	Multiple sexual partners, Infection with HPV, Smoking, Family history of the disease	Fever, Discharge per vagina, Post coital bleeding (spotting or bleeding unrelated to menstruation that occurs during or after sexual intercourse)	3 Years	2 Years	No	Don't know	Don't know	Yes	Sexual	Blood test, Pap smear, Biopsy	Genital warts	Cervical carcinoma	Yes	11-29 Years	Yes	Yes	No	Don't know	0.7	Don't know	high cost, Inadequate information	Medical school teachings
2019-12-15 19:49:12	Agree	Yes	Yarmouk University	Male	22	5th years	1001 - 1499	Rural	Jordanian	No	Irbid	Yes	Infection	Multiple sexual partners, Infection with HPV, Poor hygiene, Early age of first coitus, Family history of the disease, Nulliparity (Never married)	Bleeding per vagina, Discharge per vagina, Menstrual problems, Weight loss, Swelling of cervix, Post coital bleeding (spotting or bleeding unrelated to menstruation that occurs during or after sexual intercourse), Anemia	2 Years	5 Years	No	Yes	Yes	Yes	Sexual	Pap smear	Genital warts	Cervical carcinoma	Yes	11-29 Years	Yes	Don't know	Yes	One	0.9	Yes	Worry about complications, Worry about efficacy of vaccine	Medical school teachings
2019-12-15 19:49:58	Agree	Yes	Yarmouk University	Female	22	5th years	501- 1000	Rural	Jordanian	No	Irbid	Yes	Infection	Multiple sexual partners, Infection with HPV, Smoking, Family history of the disease	No symptoms	5 Years	3Years	No	Yes	Yes	Yes	Sexual	Pap smear	Genital warts	Cervical carcinoma	Don't know	11-29 Years	Don't know	Yes	Don't know	Don't know	0.7	Yes	high cost, Worry about complications, Worry about efficacy of vaccine, Inadequate information	Medical school teachings, Books
2019-12-15 19:50:01	Agree	Yes	Yarmouk University	Female	23	5th years	1001 - 1499	Urban	Jordanian	No	Irbid	Yes	Genetic	Smoking, Family history of the disease, Old age, Contraception (Intrauterine device/oral contraceptives), Nulliparity (Never married)	Lower abdominal pain, Bleeding per vagina, Menstrual problems, Weight loss	5 Years	2 Years	Yes	Yes	Yes	Don't know	Sexual	Blood test	Don't know	Don't know	Don't know	11-29 Years	Don't know	Yes	No	Don't know	0.7	Yes	Inadequate information	Medical school teachings, Newspapers, Social media
2019-12-15 19:50:22	Agree	Yes	Yarmouk University	Male	23	6th years	1001 - 1499	Urban	Jordanian	No	Amman	Yes	Infection	Multiple sexual partners, Infection with HPV, Poor hygiene, Early age of first coitus, Smoking	No symptoms, Bleeding per vagina, Menstrual problems, Swelling of cervix, Post coital bleeding (spotting or bleeding unrelated to menstruation that occurs during or after sexual intercourse), Anemia	3 Years	5 Years	No	Yes	No	Yes	Sexual	Blood test, Pap smear, Biopsy	Genital warts	Cervical carcinoma	Don't know	11-29 Years	Yes	Yes	Don't know	Don't know	0.9	Yes	high cost	Medical school teachings
2019-12-15 19:51:06	Agree	Yes	Yarmouk University	Male	22	4th years	1001 - 1499	Rural	Jordanian	No	Salt	Yes	Infection	Infection with HPV, Poor hygiene, Early age of first coitus, Smoking, Family history of the disease, Contraception (Intrauterine device/oral contraceptives)	Lower abdominal pain, Bleeding per vagina, Fever, Discharge per vagina, Menstrual problems, Weight loss, Swelling of cervix, Post coital bleeding (spotting or bleeding unrelated to menstruation that occurs during or after sexual intercourse), Anemia	Don't know	Don't know	Don't know	Don't know	Don't know	Don't know	Don't know	Don't know	Don't know	Don't know	Yes	0-10 Years	Yes	Don't know	Don't know	Don't know	Don't know	Don't know	Inadequate information	Medical school teachings
2019-12-15 19:51:07	Agree	Yes	Yarmouk University	Female	23	5th years	More than 2000	Rural	Jordanian	No	Irbid	No	Infection	Multiple sexual partners, Infection with HPV, Poor hygiene, Early age of first coitus, Smoking, Family history of the disease, Contraception (Intrauterine device/oral contraceptives)	No symptoms, Bleeding per vagina, Post coital bleeding (spotting or bleeding unrelated to menstruation that occurs during or after sexual intercourse)	3 Years	5 Years	No	Yes	Yes	Yes	Sexual	Blood test, Pap smear	Genital warts	Cervical carcinoma	Yes	11-29 Years	Yes	Yes	No	Two	1	Yes	Inadequate information	Medical school teachings
2019-12-15 19:52:20	Agree	Yes	Yarmouk University	Male	25	6th years	More than 2000	Urban	Non-Jordanian	No		No	Infection	Multiple sexual partners, Infection with HPV, Early age of first coitus, Smoking, Contraception (Intrauterine device/oral contraceptives)	No symptoms, Bleeding per vagina, Discharge per vagina, Post coital bleeding (spotting or bleeding unrelated to menstruation that occurs during or after sexual intercourse)	3 Years	3Years	No	Yes	Yes	Yes	Sexual	Blood test, Pap smear, PCR (Polymerase chain reaction)	Genital warts	Cervical carcinoma	Yes	11-29 Years	Yes	No	Yes	Three	0.9	Yes	high cost	Medical school teachings
2019-12-15 19:53:06	Agree	Yes	Yarmouk University	Female	22	5th years	501- 1000	Urban	Jordanian	No	Azarqa	No	Infection	Multiple sexual partners, Infection with HPV, Smoking, Family history of the disease	Menstrual problems, Weight loss, Post coital bleeding (spotting or bleeding unrelated to menstruation that occurs during or after sexual intercourse)	4 Years	2 Years	No	Don't know	Yes	Yes	Sexual	Blood test, PCR (Polymerase chain reaction)	Genital warts	Cervical carcinoma	Don't know	11-29 Years	Yes	Yes	Yes	Two	0.7	Yes	high cost, Worry about complications, Worry about efficacy of vaccine, Inadequate information	Social media
2019-12-15 19:53:17	Agree	Yes	Yarmouk University	Female	22	5th years	1001 - 1499	Rural	Jordanian	No	Irbid	Yes	Infection	Multiple sexual partners, Infection with HPV, Smoking, Family history of the disease, Contraception (Intrauterine device/oral contraceptives)	No symptoms, Lower abdominal pain, Bleeding per vagina, Discharge per vagina, Post coital bleeding (spotting or bleeding unrelated to menstruation that occurs during or after sexual intercourse)	3 Years	5 Years	No	Yes	Yes	Yes	Sexual	Pap smear, Biopsy	Genital warts	Cervical carcinoma	Yes	11-29 Years	Yes	No	Yes	Three	0.7	Yes	high cost	Medical school teachings, Internet
2019-12-15 19:54:25	Agree	Yes	Yarmouk University	Male	24	6th years	More than 2000	Urban	Jordanian	No	Irbid	Yes	Infection	Multiple sexual partners, Infection with HPV, Smoking, Family history of the disease, Old age	Bleeding per vagina, Menstrual problems, Weight loss, Post coital bleeding (spotting or bleeding unrelated to menstruation that occurs during or after sexual intercourse)	2 Years	5 Years	Yes	Yes	Yes	Yes	Sexual	Blood test, PCR (Polymerase chain reaction)	Genital warts	Cervical carcinoma	Yes	30-50 Years	Yes	Yes	Yes	Don't know	0.9	No	high cost, Inadequate information	Medical school teachings, Books
2019-12-15 19:54:57	Agree	Yes	Yarmouk University	Female	22	5th years	501- 1000	Urban	Jordanian	No	ArRamtha	Yes	Infection	Multiple sexual partners, Infection with HPV, Smoking, Family history of the disease, Contraception (Intrauterine device/oral contraceptives)	No symptoms, Bleeding per vagina, Discharge per vagina, Menstrual problems, Itching, Weight loss, Swelling of cervix	Don't know	Don't know	No	Yes	Yes	Yes	Sexual	Blood test, Pap smear, PCR (Polymerase chain reaction)	Genital warts	Genital warts	Don't know	11-29 Years	Don't know	Yes	Don't know	One	0.7	Yes	high cost, Worry about complications	Medical school teachings, Internet
2019-12-15 19:56:54	Agree	Yes	Yarmouk University	Female	24	6th years	501- 1000	Rural	Jordanian	No	Irbid	No	Infection	Multiple sexual partners, Infection with HPV, Poor hygiene, Contraception (Intrauterine device/oral contraceptives)	Bleeding per vagina, Discharge per vagina, Itching, Post coital bleeding (spotting or bleeding unrelated to menstruation that occurs during or after sexual intercourse)	3 Years	5 Years	No	Yes	Yes	Yes	Sexual	Blood test, Pap smear, Biopsy	Genital warts	Cervical carcinoma	Don't know	11-29 Years	Don't know	Yes	Don't know	Four	Don't know	Yes	high cost	Medical school teachings
2019-12-15 19:57:33	Agree	Yes	Yarmouk University	Male	23	6th years	1500 - 2000	Urban	Jordanian	No	Irbid	Yes	Infection	Multiple sexual partners, Infection with HPV, Smoking, Old age	Lower abdominal pain, Bleeding per vagina, Discharge per vagina, Itching, Weight loss, Post coital bleeding (spotting or bleeding unrelated to menstruation that occurs during or after sexual intercourse)	5 Years	2 Years	Yes	Yes	Yes	Yes	Sexual	Pap smear, PCR (Polymerase chain reaction)	Genital warts	Plantar warts	Yes	30-50 Years	Don't know	Yes	Yes	Don't know	0.5	Yes	Worry about complications, Worry about efficacy of vaccine, Inadequate information	Friends, Social media, Internet, Television
2019-12-15 19:58:40	Agree	Yes	Yarmouk University	Female	22	5th years	501- 1000	Rural	Jordanian	No	Irbid	Yes	Infection	Multiple sexual partners, Infection with HPV, Family history of the disease, Nulliparity (Never married)	Bleeding per vagina, Discharge per vagina, Weight loss, Swelling of cervix, Post coital bleeding (spotting or bleeding unrelated to menstruation that occurs during or after sexual intercourse)	4 Years	5 Years	Yes	No	Yes	Yes	Sexual	PCR (Polymerase chain reaction)	Plantar warts	Genital warts	Yes	0-10 Years	No	No	Yes	Three	0.5	No	high cost, Inadequate information	Medical school teachings, Friends, Social media
2019-12-15 19:59:34	Agree	Yes	Yarmouk University	Female	24	6th years	More than 2000	Urban	Jordanian	No	Irbid	Yes	Infection	Multiple sexual partners, Infection with HPV, Poor hygiene, Smoking, Family history of the disease	No symptoms, Bleeding per vagina, Itching, Weight loss, Post coital bleeding (spotting or bleeding unrelated to menstruation that occurs during or after sexual intercourse)	3 Years	5 Years	No	Yes	Yes	Yes	Sexual	Blood test, Pap smear, Biopsy	Genital warts	Cervical carcinoma	Don't know	0-10 Years	Don't know	Yes	Yes	Three	0.7	Yes	high cost	Medical school teachings
2019-12-15 20:01:56	Agree	Yes	Yarmouk University	Male	23	6th years	501- 1000	Urban	Jordanian	No	Irbid	No	Infection	Multiple sexual partners, Infection with HPV, Poor hygiene, Early age of first coitus, Smoking, Contraception (Intrauterine device/oral contraceptives), Nulliparity (Never married)	No symptoms, Lower abdominal pain, Bleeding per vagina, Fever, Discharge per vagina, Menstrual problems, Itching, Weight loss, Swelling of cervix, Post coital bleeding (spotting or bleeding unrelated to menstruation that occurs during or after sexual intercourse), Anemia	5 Years	3Years	Yes	Yes	No	Yes	Sexual	Pap smear, Biopsy	Genital warts	Cervical carcinoma	Yes	11-29 Years	No	No	Yes	Three	1	No	high cost	Medical school teachings
2019-12-15 20:09:09	Agree	Yes	Yarmouk University	Male	24	6th years	Less than 500	Rural	Jordanian	No	Irbid	No	Infection	Multiple sexual partners, Infection with HPV, Poor hygiene, Early age of first coitus, Smoking, Contraception (Intrauterine device/oral contraceptives)	Lower abdominal pain, Bleeding per vagina, Menstrual problems, Weight loss, Swelling of cervix, Post coital bleeding (spotting or bleeding unrelated to menstruation that occurs during or after sexual intercourse), Anemia	3 Years	5 Years	No	Yes	Yes	Yes	Sexual	Pap smear, PCR (Polymerase chain reaction), Biopsy	Genital warts	Cervical carcinoma	Yes	11-29 Years	Yes	No	Yes	Three	0.9	Yes	high cost	Medical school teachings, Newspapers, Friends, Books, Social media, Internet, Television
2019-12-15 20:11:17	Agree	Yes	Yarmouk University	Female	23	5th years	1001 - 1499	Urban	Jordanian	No	Irbid	Yes	Infection	Infection with HPV, Smoking, Contraception (Intrauterine device/oral contraceptives), Nulliparity (Never married)	No symptoms, Lower abdominal pain, Bleeding per vagina, Menstrual problems, Weight loss	5 Years	Don't know	Don't know	Don't know	Yes	Yes	Environmental	Pap smear	Genital warts	Cervical carcinoma	Yes	30-50 Years	Don't know	Don't know	Yes	Don't know	Don't know	No	Inadequate information	Medical school teachings
2019-12-15 20:11:28	Agree	Yes	Yarmouk University	Male	24	6th years	1500 - 2000	Rural	Jordanian	No	Irbid	Yes	Infection	Multiple sexual partners, Infection with HPV, Poor hygiene, Early age of first coitus, Smoking	No symptoms, Bleeding per vagina, Discharge per vagina, Itching, Weight loss, Swelling of cervix, Post coital bleeding (spotting or bleeding unrelated to menstruation that occurs during or after sexual intercourse), Anemia	Don't know	Don't know	No	Yes	Yes	Yes	Sexual	Pap smear, PCR (Polymerase chain reaction)	Genital warts	Cervical carcinoma	Yes	0-10 Years	Don't know	No	No	Don't know	0.9	Yes	Inadequate information	Medical school teachings
2019-12-15 20:15:10	Agree	Yes	Yarmouk University	Female	23	3th years	501- 1000	Urban	Jordanian	No	Madaba	No	Infection	Multiple sexual partners, Infection with HPV, Smoking, Family history of the disease	No symptoms, Bleeding per vagina, Discharge per vagina, Itching, Post coital bleeding (spotting or bleeding unrelated to menstruation that occurs during or after sexual intercourse)	3 Years	5 Years	No	Yes	Yes	Yes	Sexual	Pap smear, Biopsy	Cervical carcinoma	Genital warts	No	11-29 Years	Yes	Yes	Yes	Three	0.7	Yes	Inadequate information	Medical school teachings, Internet
2019-12-15 20:15:17	Agree	Yes	Yarmouk University	Female	23	6th years	1001 - 1499	Urban	Jordanian	No	Amman	Yes	Infection	Multiple sexual partners, Infection with HPV, Early age of first coitus, Smoking, Contraception (Intrauterine device/oral contraceptives)	Lower abdominal pain, Discharge per vagina, Itching, Swelling of cervix, Post coital bleeding (spotting or bleeding unrelated to menstruation that occurs during or after sexual intercourse)	3 Years	5 Years	Yes	Yes	Yes	Yes	Sexual	Pap smear, Biopsy	Genital warts	Cervical carcinoma	Don't know	11-29 Years	Yes	Yes	No	Three	0.7	Yes	high cost	Medical school teachings, Books
2019-12-15 20:16:18	Agree	Yes	Yarmouk University	Female	22	5th years	1001 - 1499	Urban	Jordanian	No	Irbid	No	Genetic	Infection with HPV, Smoking, Family history of the disease, Contraception (Intrauterine device/oral contraceptives)	Bleeding per vagina, Discharge per vagina, Menstrual problems, Weight loss	3 Years	2 Years	No	Yes	No	Yes	Sexual	Pap smear	Plantar warts	Cervical carcinoma	No	0-10 Years	Yes	Yes	No	Don't know	0.7	Yes	Inadequate information	Medical school teachings
2019-12-15 20:16:24	Agree	Yes	Yarmouk University	Female	24	6th years	1500 - 2000	Rural	Jordanian	No	Ajl'on	No	Infection	Multiple sexual partners, Infection with HPV, Poor hygiene, Early age of first coitus, Smoking, Family history of the disease	No symptoms, Bleeding per vagina, Discharge per vagina, Itching, Weight loss, Swelling of cervix, Post coital bleeding (spotting or bleeding unrelated to menstruation that occurs during or after sexual intercourse), Anemia	3 Years	5 Years	No	Yes	Yes	Yes	Sexual	Pap smear, PCR (Polymerase chain reaction), Biopsy	Genital warts	Cervical carcinoma	Yes	11-29 Years	Don't know	Yes	Don't know	Don't know	0.9	Yes	Worry about efficacy of vaccine, Inadequate information	Medical school teachings, Books
2019-12-15 20:18:11	Agree	Yes	Yarmouk University	Female	23	6th years	1001 - 1499	Rural	Jordanian	No	Irbid	No	Infection	Multiple sexual partners, Infection with HPV, Poor hygiene, Smoking	No symptoms, Bleeding per vagina, Discharge per vagina, Itching, Weight loss, Post coital bleeding (spotting or bleeding unrelated to menstruation that occurs during or after sexual intercourse)	3 Years	Don't know	No	Yes	Don't know	Yes	Sexual	Pap smear, Biopsy	Genital warts	Cervical carcinoma	Don't know	11-29 Years	Yes	Yes	Don't know	Don't know	Don't know	No	Inadequate information	Medical school teachings
2019-12-15 20:20:35	Agree	Yes	Yarmouk University	Female	23	6th years	1001 - 1499	Rural	Jordanian	No	Jarash	Yes	Infection	Multiple sexual partners, Infection with HPV, Contraception (Intrauterine device/oral contraceptives)	No symptoms, Bleeding per vagina, Discharge per vagina, Itching, Weight loss, Post coital bleeding (spotting or bleeding unrelated to menstruation that occurs during or after sexual intercourse)	5 Years	3Years	Yes	Yes	Yes	Yes	Sexual	Pap smear, Biopsy	Plantar warts	Cervical carcinoma	Yes	11-29 Years	No	Yes	Yes	Three	Don't know	Yes	high cost	Medical school teachings
2019-12-15 20:21:55	Agree	Yes	Yarmouk University	Male	22	5th years	1001 - 1499	Rural	Jordanian	No	Irbid	No	Infection	Multiple sexual partners, Poor hygiene	Weight loss, Swelling of cervix, Anemia	Don't know	Don't know	Don't know	Don't know	Don't know	Don't know	Don't know	Don't know	Don't know	Don't know	Don't know	0-10 Years	Yes	No	Don't know	One	Don't know	Yes	Worry about efficacy of vaccine, Inadequate information	Medical school teachings
2019-12-15 20:22:34	Agree	Yes	Yarmouk University	Male	23	6th years	1500 - 2000	Urban	Jordanian	No	Amman	No	Infection	Multiple sexual partners, Infection with HPV, Poor hygiene, Smoking, Family history of the disease, Old age, Contraception (Intrauterine device/oral contraceptives)	Bleeding per vagina, Discharge per vagina, Menstrual problems, Itching, Weight loss, Swelling of cervix, Post coital bleeding (spotting or bleeding unrelated to menstruation that occurs during or after sexual intercourse), Anemia	5 Years	2 Years	Don't know	Yes	Don't know	Yes	Sexual	Pap smear, PCR (Polymerase chain reaction), Biopsy	Don't know	Cervical carcinoma	Don't know	11-29 Years	Don't know	Yes	No	Don't know	0.7	Yes	Inadequate information	Medical school teachings
2019-12-15 20:30:08	Agree	Yes	Yarmouk University	Female	23	6th years	501- 1000	Urban	Jordanian	No	Irbid	Yes	Infection	Multiple sexual partners, Infection with HPV, Family history of the disease	Bleeding per vagina, Discharge per vagina, Itching, Post coital bleeding (spotting or bleeding unrelated to menstruation that occurs during or after sexual intercourse)	3 Years	2 Years	Yes	Yes	Yes	Yes	Sexual	Pap smear	Genital warts	Cervical carcinoma	Yes	30-50 Years	No	Yes	Don't know	Don't know	Don't know	Don't know	Inadequate information	Medical school teachings
2019-12-15 20:45:43	Agree	Yes	Yarmouk University	Male	22	5th years	1001 - 1499	Urban	Jordanian	No	Amman	No	Genetic	Infection with HPV, Early age of first coitus, Smoking, Family history of the disease, Old age, Contraception (Intrauterine device/oral contraceptives), Nulliparity (Never married)	No symptoms, Lower abdominal pain, Bleeding per vagina, Discharge per vagina, Menstrual problems, Weight loss, Post coital bleeding (spotting or bleeding unrelated to menstruation that occurs during or after sexual intercourse), Anemia	2 Years	4 Years	No	No	No	Yes	Sexual	Blood test, Pap smear, PCR (Polymerase chain reaction)	Genital warts	Cervical carcinoma	Don't know	30-50 Years	Don't know	Don't know	Don't know	Don't know	Don't know	Don't know	Inadequate information	Social media
2019-12-15 20:49:07	Agree	Yes	Yarmouk University	Female	23	6th years	501- 1000	Urban	Jordanian	No	Irbid	No	Infection	Infection with HPV, Smoking, Family history of the disease	Bleeding per vagina, Discharge per vagina, Post coital bleeding (spotting or bleeding unrelated to menstruation that occurs during or after sexual intercourse)	3 Years	2 Years	No	Yes	Yes	Yes	Sexual	Pap smear	Genital warts	Cervical carcinoma	Don't know	11-29 Years	Don't know	Don't know	Don't know	Don't know	Don't know	Yes	high cost, Worry about complications, Worry about efficacy of vaccine, Inadequate information	Medical school teachings, Books
2019-12-15 21:14:16	Agree	Yes	Yarmouk University	Male	23	6th years	1001 - 1499	Urban	Jordanian	No	Irbid	Yes	Environmental	Multiple sexual partners, Infection with HPV, Poor hygiene, Smoking, Family history of the disease	Bleeding per vagina, Menstrual problems, Weight loss, Post coital bleeding (spotting or bleeding unrelated to menstruation that occurs during or after sexual intercourse)	3 Years	5 Years	No	Yes	Yes	Yes	Sexual	PCR (Polymerase chain reaction)	Genital warts	Cervical carcinoma	Don't know	11-29 Years	Don't know	Yes	Don't know	Don't know	0.7	Yes	high cost, Inadequate information	Medical school teachings
2019-12-15 21:14:25	Agree	Yes	Yarmouk University	Male	22	5th years	501- 1000	Urban	Jordanian	No	Irbid	Yes	Infection	Multiple sexual partners, Infection with HPV, Early age of first coitus	Discharge per vagina, Weight loss, Swelling of cervix, Post coital bleeding (spotting or bleeding unrelated to menstruation that occurs during or after sexual intercourse)	5 Years	2 Years	No	Yes	Yes	Yes	Sexual	Pap smear, Biopsy	Genital warts	Cervical carcinoma	Yes	11-29 Years	Yes	No	No	Three	0.9	Yes	Inadequate information	Medical school teachings, Social media
2019-12-15 21:21:43	Agree	Yes	Yarmouk University	Male	24	6th years	501- 1000	Urban	Jordanian	No	Irbid	Yes	Infection	Multiple sexual partners, Infection with HPV, Early age of first coitus, Smoking, Contraception (Intrauterine device/oral contraceptives)	Bleeding per vagina, Discharge per vagina, Menstrual problems, Post coital bleeding (spotting or bleeding unrelated to menstruation that occurs during or after sexual intercourse)	3 Years	5 Years	No	Yes	Yes	Yes	Sexual	Pap smear	Genital warts	Cervical carcinoma	No	11-29 Years	Yes	No	Don't know	Three	0.7	Yes	high cost	Medical school teachings, Internet
2019-12-15 21:23:46	Agree	Yes	Yarmouk University	Female	23	6th years	501- 1000	Rural	Jordanian	No	Irbid	No	Infection	Multiple sexual partners, Infection with HPV, Poor hygiene, Early age of first coitus, Smoking, Contraception (Intrauterine device/oral contraceptives)	Bleeding per vagina, Discharge per vagina, Post coital bleeding (spotting or bleeding unrelated to menstruation that occurs during or after sexual intercourse), Anemia	3 Years	3Years	No	Yes	Yes	Yes	Sexual	Pap smear	Genital warts	Cervical carcinoma	No	11-29 Years	Don't know	Yes	Yes	Two	0.9	Yes	high cost	Medical school teachings
2019-12-15 22:23:11	Agree	Yes	Yarmouk University	Male	23	6th years	Less than 500	Urban	Jordanian	No	Amman	No	Infection	Multiple sexual partners, Infection with HPV, Poor hygiene, Smoking, Family history of the disease, Old age	No symptoms, Bleeding per vagina, Menstrual problems, Post coital bleeding (spotting or bleeding unrelated to menstruation that occurs during or after sexual intercourse), Anemia	5 Years	2 Years	No	Yes	Yes	Yes	Sexual	Pap smear, PCR (Polymerase chain reaction), Biopsy	Genital warts	Cervical carcinoma	Yes	11-29 Years	Yes	Don't know	Yes	Three	Don't know	Yes	high cost	Medical school teachings, Internet
2019-12-15 22:31:12	Agree	Yes	Yarmouk University	Female	22	5th years	More than 2000	Urban	Jordanian	No	Irbid	Yes	Infection	Multiple sexual partners, Infection with HPV, Early age of first coitus, Smoking	No symptoms	3 Years	5 Years	No	Yes	Yes	Yes	Sexual	Pap smear, PCR (Polymerase chain reaction)	Genital warts	Cervical carcinoma	Yes	11-29 Years	Don't know	No	Don't know	Two	0.7	Yes	high cost, Inadequate information	Medical school teachings
2019-12-15 23:15:01	Agree	Yes	Yarmouk University	Female	23	6th years	1001 - 1499	Urban	Jordanian	No	Irbid	Yes	Infection	Multiple sexual partners, Infection with HPV, Poor hygiene, Early age of first coitus, Smoking, Family history of the disease, Old age, Contraception (Intrauterine device/oral contraceptives)	Bleeding per vagina, Menstrual problems, Itching, Weight loss, Swelling of cervix, Post coital bleeding (spotting or bleeding unrelated to menstruation that occurs during or after sexual intercourse), Anemia	3 Years	2 Years	Yes	Yes	Yes	Yes	Sexual	PCR (Polymerase chain reaction)	Cervical carcinoma	Genital warts	Don't know	11-29 Years	Yes	Yes	No	Three	0.9	Yes	high cost, Inadequate information	Medical school teachings
2019-12-16 16:23:08	Agree	Yes	Yarmouk University	Male	22	5th years	501- 1000	Urban	Jordanian	No	Irbid	No	Infection	Multiple sexual partners, Infection with HPV, Early age of first coitus, Smoking, Family history of the disease, Contraception (Intrauterine device/oral contraceptives)	No symptoms, Lower abdominal pain, Bleeding per vagina, Post coital bleeding (spotting or bleeding unrelated to menstruation that occurs during or after sexual intercourse)	3 Years	5 Years	No	Yes	Yes	Yes	Sexual	Blood test, Pap smear, PCR (Polymerase chain reaction)	Genital warts	Cervical carcinoma	Don't know	11-29 Years	Yes	Yes	Don't know	Don't know	0.9	Yes	high cost, Inadequate information	Medical school teachings, Books, Internet
2019-12-16 17:55:53	Agree	Yes	Yarmouk University	Female	22	5th years	1001 - 1499	Urban	Jordanian	No	Irbid	Yes	Infection	Multiple sexual partners, Infection with HPV, Poor hygiene, Early age of first coitus, Smoking, Family history of the disease	No symptoms, Bleeding per vagina	3 Years	5 Years	No	Yes	Yes	Yes	Sexual	Pap smear, PCR (Polymerase chain reaction)	Genital warts	Cervical carcinoma	Yes	11-29 Years	Yes	No	Yes	One	0.9	Yes	high cost	Medical school teachings, Books
2019-12-16 22:27:18	Agree	Yes	Yarmouk University	Female	23	5th years	501- 1000	Urban	Jordanian	No	Irbid	Yes	Infection	Multiple sexual partners, Infection with HPV, Early age of first coitus, Smoking, Family history of the disease, Old age, Contraception (Intrauterine device/oral contraceptives)	No symptoms, Bleeding per vagina, Menstrual problems, Weight loss, Post coital bleeding (spotting or bleeding unrelated to menstruation that occurs during or after sexual intercourse)	3 Years	2 Years	No	Yes	Don't know	Yes	Sexual	Pap smear, PCR (Polymerase chain reaction)	Genital warts	Cervical carcinoma	Don't know	11-29 Years	Yes	Don't know	Don't know	Two	0.7	Yes	high cost, Worry about efficacy of vaccine	Medical school teachings
2019-12-20 13:30:38	Agree	Yes	Yarmouk University	Male	22	4th years	1001 - 1499	Urban	Jordanian	No	Azarqa	Yes	Infection	Multiple sexual partners, Infection with HPV, Poor hygiene, Early age of first coitus, Old age, Contraception (Intrauterine device/oral contraceptives), Nulliparity (Never married)	Bleeding per vagina, Discharge per vagina, Menstrual problems, Itching, Post coital bleeding (spotting or bleeding unrelated to menstruation that occurs during or after sexual intercourse), Anemia	Don't know	Don't know	No	Yes	Yes	Yes	Sexual	Pap smear	Genital warts	Cervical carcinoma	Don't know	11-29 Years	Yes	Don't know	Don't know	Don't know	0.9	Yes	Inadequate information	Medical school teachings, Social media, Internet
2019-12-20 13:37:22	Agree	Yes	Yarmouk University	Female	20	4th years	1500 - 2000	Urban	Jordanian	No	Irbid	Yes	Genetic	Multiple sexual partners, Infection with HPV, Poor hygiene, Early age of first coitus, Family history of the disease, Old age, Contraception (Intrauterine device/oral contraceptives)	Lower abdominal pain, Bleeding per vagina, Fever, Menstrual problems, Weight loss, Swelling of cervix, Post coital bleeding (spotting or bleeding unrelated to menstruation that occurs during or after sexual intercourse)	5 Years	2 Years	No	Yes	Yes	Yes	Sexual	PCR (Polymerase chain reaction)	Genital warts	Cervical carcinoma	No	30-50 Years	Yes	Yes	Yes	Three	0.7	Yes	high cost, Worry about complications, Inadequate information	Medical school teachings, Social media, Internet
2019-12-20 13:46:56	Agree	Yes	Yarmouk University	Female	21	4th years	1500 - 2000	Rural	Jordanian	No	Irbid	No	Infection	Multiple sexual partners, Infection with HPV, Smoking, Family history of the disease, Old age, Contraception (Intrauterine device/oral contraceptives), Nulliparity (Never married)	Lower abdominal pain, Bleeding per vagina, Discharge per vagina, Menstrual problems, Weight loss, Swelling of cervix, Post coital bleeding (spotting or bleeding unrelated to menstruation that occurs during or after sexual intercourse), Anemia	5 Years	2 Years	No	Yes	Yes	Yes	Sexual	PCR (Polymerase chain reaction)	Plantar warts	Cervical carcinoma	Don't know	11-29 Years	Yes	No	Yes	Don't know	Don't know	Yes	high cost, Inadequate information	Medical school teachings, Books, Internet
2019-12-20 13:57:54	Agree	Yes	Yarmouk University	Male	22	4th years	501- 1000	Rural	Jordanian	No	Aqaba	Yes	Infection	Infection with HPV, Poor hygiene, Family history of the disease	Swelling of cervix	Don't know	Don't know	Don't know	Yes	No	Yes	Sexual	Pap smear, PCR (Polymerase chain reaction), Biopsy	Don't know	Don't know	Yes	30-50 Years	No	No	Yes	Don't know	1	No	Inadequate information	Internet
2019-12-20 14:18:44	Agree	Yes	Yarmouk University	Female	21	4th years	501- 1000	Urban	Jordanian	No	Irbid	Yes	Infection	Multiple sexual partners, Infection with HPV, Family history of the disease, Old age	Lower abdominal pain, Bleeding per vagina, Discharge per vagina, Menstrual problems, Weight loss, Post coital bleeding (spotting or bleeding unrelated to menstruation that occurs during or after sexual intercourse), Anemia	4 Years	2 Years	No	Yes	Yes	Yes	Sexual	PCR (Polymerase chain reaction)	Genital warts	Cervical carcinoma	Yes	30-50 Years	Yes	Don't know	Don't know	Two	0.9	Yes	high cost, Worry about efficacy of vaccine, Inadequate information	Medical school teachings
2019-12-20 14:20:52	Agree	Yes	Yarmouk University	Male	21	4th years	More than 2000	Urban	Jordanian	No	Irbid	No	Infection	Multiple sexual partners, Infection with HPV, Poor hygiene	Bleeding per vagina, Menstrual problems, Weight loss, Swelling of cervix, Anemia	Don't know	Don't know	No	Yes	Yes	Yes	Sexual	Blood test, Pap smear, PCR (Polymerase chain reaction), Biopsy	Don't know	Genital warts	Don't know	11-29 Years	Yes	Yes	Yes	Don't know	0.5	Don't know	Inadequate information	Medical school teachings, Internet
2019-12-20 14:26:01	Agree	Yes	Yarmouk University	Female	21	4th years	501- 1000	Urban	Jordanian	No	Irbid	Yes	Infection	Multiple sexual partners, Infection with HPV, Poor hygiene, Old age	No symptoms, Discharge per vagina, Itching	3 Years	2 Years	Yes	Yes	Yes	Yes	Sexual	Pap smear, Biopsy	Genital warts	Cervical carcinoma	Don't know	11-29 Years	Don't know	Yes	Don't know	Don't know	Don't know	Yes	high cost, Inadequate information	Medical school teachings
2019-12-20 14:31:08	Agree	Yes	Yarmouk University	Male	22	4th years	1001 - 1499	Urban	Jordanian	No	Irbid	No	Genetic	Multiple sexual partners, Infection with HPV, Smoking	No symptoms, Bleeding per vagina, Fever, Discharge per vagina, Weight loss, Post coital bleeding (spotting or bleeding unrelated to menstruation that occurs during or after sexual intercourse)	Don't know	2 Years	No	Yes	Yes	Yes	Sexual	Pap smear	Genital warts	Cervical carcinoma	Yes	11-29 Years	Don't know	Don't know	No	Don't know	0.9	Yes	high cost	Medical school teachings, Newspapers, Books, Social media
2019-12-20 14:37:35	Agree	Yes	Yarmouk University	Female	22	4th years	More than 2000	Urban	Jordanian	No	Irbid	Yes	Infection	Multiple sexual partners, Infection with HPV, Poor hygiene, Family history of the disease, Old age, Contraception (Intrauterine device/oral contraceptives)	Lower abdominal pain, Bleeding per vagina, Weight loss, Swelling of cervix, Post coital bleeding (spotting or bleeding unrelated to menstruation that occurs during or after sexual intercourse), Anemia	5 Years	2 Years	No	No	Yes	Yes	Sexual	Pap smear, PCR (Polymerase chain reaction)	Genital warts	Cervical carcinoma	Don't know	11-29 Years	Don't know	Yes	No	Three	0.5	Yes	high cost, Worry about complications, Inadequate information	Medical school teachings, Books
2019-12-20 14:56:40	Agree	Yes	Yarmouk University	Male	21	4th years	1001 - 1499	Urban	Jordanian	No	Irbid	No	Infection	Multiple sexual partners, Infection with HPV, Poor hygiene, Nulliparity (Never married)	Bleeding per vagina, Fever, Discharge per vagina, Itching, Swelling of cervix, Anemia	Don't know	Don't know	No	No	Yes	Yes	Sexual	Blood test, Pap smear, PCR (Polymerase chain reaction), Biopsy	Genital warts	Cervical carcinoma	Yes	0-10 Years	Don't know	Don't know	Don't know	Don't know	Don't know	Don't know	high cost, Worry about complications, Worry about efficacy of vaccine, Inadequate information	Medical school teachings, Newspapers, Friends, Books, Social media, Internet, Television
2019-12-20 15:03:56	Agree	Yes	Yarmouk University	Male	21	4th years	1001 - 1499	Urban	Jordanian	No	Irbid	No	Infection	Multiple sexual partners, Infection with HPV, Poor hygiene, Smoking, Family history of the disease	Bleeding per vagina, Fever, Menstrual problems, Weight loss, Swelling of cervix, Post coital bleeding (spotting or bleeding unrelated to menstruation that occurs during or after sexual intercourse)	Don't know	Don't know	No	Yes	Don't know	Yes	Sexual	Blood test, Pap smear, PCR (Polymerase chain reaction)	Genital warts	Cervical carcinoma	Don't know	0-10 Years	Yes	Don't know	Don't know	Don't know	0.9	Yes	Worry about efficacy of vaccine, Inadequate information	Medical school teachings, Friends, Books, Internet
2019-12-20 15:44:10	Agree	Yes	Yarmouk University	Male	22	4th years	501- 1000	Rural	Jordanian	No	Irbid	Yes	Infection	Infection with HPV, Early age of first coitus, Smoking, Family history of the disease, Old age, Contraception (Intrauterine device/oral contraceptives), Nulliparity (Never married)	Lower abdominal pain, Bleeding per vagina, Fever, Discharge per vagina, Menstrual problems, Itching, Weight loss, Swelling of cervix, Post coital bleeding (spotting or bleeding unrelated to menstruation that occurs during or after sexual intercourse), Anemia	Don't know	Don't know	Don't know	Don't know	Yes	Don't know	Don't know	Blood test, PCR (Polymerase chain reaction), Biopsy	Don't know	Don't know	Don't know	51 and above Years	Yes	Don't know	Don't know	Don't know	Don't know	Don't know	high cost, Worry about complications, Worry about efficacy of vaccine, Inadequate information	Medical school teachings
2019-12-20 17:01:18	Agree	Yes	Yarmouk University	Male	20	3th years	Less than 500	Urban	Jordanian	No	Irbid	Yes	Genetic	Multiple sexual partners, Infection with HPV, Family history of the disease	Bleeding per vagina, Menstrual problems, Weight loss	Don't know	Don't know	Don't know	Don't know	Yes	Don't know	Sexual	Biopsy	Genital warts	Cervical carcinoma	Don't know	30-50 Years	Don't know	Don't know	Don't know	Don't know	Don't know	Don't know	high cost	Medical school teachings, Internet
2019-12-20 17:16:49	Agree	Yes	Yarmouk University	Female	22	4th years	Less than 500	Urban	Non-Jordanian	No		Yes	Infection	Multiple sexual partners, Infection with HPV, Poor hygiene, Smoking, Family history of the disease, Old age, Contraception (Intrauterine device/oral contraceptives)	Bleeding per vagina, Menstrual problems, Weight loss, Post coital bleeding (spotting or bleeding unrelated to menstruation that occurs during or after sexual intercourse)	Don't know	Don't know	No	Don't know	Yes	Yes	Don't know	Blood test, PCR (Polymerase chain reaction), Biopsy	Plantar warts	Genital warts	Don't know	30-50 Years	Don't know	Don't know	No	Don't know	Don't know	Don't know	high cost, Worry about complications, Inadequate information	Internet
2019-12-20 17:17:05	Agree	Yes	Yarmouk University	Female	22	4th years	501- 1000	Urban	Jordanian	No	Salt	Yes	Infection	Infection with HPV, Poor hygiene, Family history of the disease	Lower abdominal pain, Bleeding per vagina, Menstrual problems, Itching, Swelling of cervix	3 Years	2 Years	Yes	Yes	Yes	Yes	Sexual	Pap smear	Genital warts	Cervical carcinoma	Don't know	51 and above Years	No	Yes	Yes	Don't know	0.9	No	high cost, Inadequate information	Medical school teachings, Internet
2019-12-20 17:18:54	Agree	Yes	Yarmouk University	Female	21	3th years	501- 1000	Rural	Jordanian	No	Irbid	Yes	Infection	Multiple sexual partners, Infection with HPV, Poor hygiene, Family history of the disease, Contraception (Intrauterine device/oral contraceptives)	Bleeding per vagina, Discharge per vagina, Menstrual problems, Swelling of cervix, Post coital bleeding (spotting or bleeding unrelated to menstruation that occurs during or after sexual intercourse)	5 Years	3Years	No	Yes	Yes	Yes	Sexual	Blood test	Plantar warts	Genital warts	Don't know	11-29 Years	Don't know	Yes	Don't know	Three	0.7	Yes	high cost, Worry about complications, Worry about efficacy of vaccine	Newspapers, Friends, Social media, Internet, Television
2019-12-20 17:21:44	Agree	Yes	Yarmouk University	Male	29	3th years	501- 1000	Urban	Jordanian	No	Amman	No	Genetic	Multiple sexual partners, Smoking, Family history of the disease, Contraception (Intrauterine device/oral contraceptives)	Lower abdominal pain, Bleeding per vagina, Itching, Weight loss, Swelling of cervix	Don't know	Don't know	Don't know	Don't know	Yes	Don't know	Sexual	Don't know	Don't know	Don't know	Yes	11-29 Years	Yes	Yes	No	Don't know	0.9	Yes	high cost, Inadequate information	Friends, Social media
2019-12-20 17:22:23	Agree	Yes	Yarmouk University	Male	20	3th years	1001 - 1499	Urban	Jordanian	No	Irbid	No	Genetic	Infection with HPV	Swelling of cervix	3 Years	2 Years	No	No	Yes	No	Oro-fecal	Blood test, Pap smear, PCR (Polymerase chain reaction)	Genital warts	Plantar warts	Yes	11-29 Years	No	No	Yes	Two	0.7	No	Worry about complications, Worry about efficacy of vaccine	Newspapers, Books
2019-12-20 18:02:10	Agree	Yes	Yarmouk University	Male	23	4th years	1500 - 2000	Rural	Jordanian	Yes	Amman	Yes	Infection	Infection with HPV, Poor hygiene, Smoking, Family history of the disease, Contraception (Intrauterine device/oral contraceptives)	Fever, Discharge per vagina, Menstrual problems, Weight loss, Post coital bleeding (spotting or bleeding unrelated to menstruation that occurs during or after sexual intercourse)	4 Years	2 Years	No	Yes	Don't know	Yes	Sexual	Blood test, Pap smear, PCR (Polymerase chain reaction), Biopsy	Don't know	Don't know	No	30-50 Years	No	Don't know	Yes	Three	0.7	Yes	high cost, Inadequate information	Social media, Internet
2019-12-20 18:14:44	Agree	Yes	Yarmouk University	Female	20	3th years	1001 - 1499	Rural	Jordanian	No	Ajl'on	Yes	Infection	Multiple sexual partners, Infection with HPV, Poor hygiene, Early age of first coitus, Smoking, Family history of the disease, Contraception (Intrauterine device/oral contraceptives)	Bleeding per vagina, Post coital bleeding (spotting or bleeding unrelated to menstruation that occurs during or after sexual intercourse), Anemia	3 Years	5 Years	Don't know	Yes	Don't know	Yes	Sexual	Pap smear	Genital warts	Cervical carcinoma	Don't know	11-29 Years	Yes	Don't know	Don't know	Two	Don't know	Yes	Worry about complications, Worry about efficacy of vaccine, Inadequate information	Medical school teachings, Internet
2019-12-20 18:39:26	Agree	Yes	Yarmouk University	Female	21	4th years	1001 - 1499	Urban	Jordanian	No	Irbid	Yes	Genetic	Multiple sexual partners, Infection with HPV, Poor hygiene, Early age of first coitus, Family history of the disease, Contraception (Intrauterine device/oral contraceptives)	Bleeding per vagina, Menstrual problems, Post coital bleeding (spotting or bleeding unrelated to menstruation that occurs during or after sexual intercourse)	3 Years	Don't know	No	Yes	Yes	Yes	Sexual	Blood test, Pap smear, PCR (Polymerase chain reaction), Biopsy	Don't know	Don't know	Yes	11-29 Years	Yes	Yes	Don't know	Don't know	0.7	Yes	Inadequate information	Medical school teachings
2019-12-20 21:34:06	Agree	Yes	University of Jordan	Female	19	3th years	501- 1000	Urban	Jordanian	No	Salt	No	Infection	Multiple sexual partners, Infection with HPV, Contraception (Intrauterine device/oral contraceptives)	Discharge per vagina, Itching, Swelling of cervix	Don't know	Don't know	Don't know	Yes	No	Yes	Sexual	Pap smear	Genital warts	Cervical carcinoma	Don't know	30-50 Years	No	Don't know	No	Don't know	Don't know	No	high cost, Worry about complications	Medical school teachings
2019-12-20 21:40:11	Agree	Yes	University of Jordan	Male	19	3th years	1001 - 1499	Rural	Jordanian	No	Amman	No	Environmental	Infection with HPV, Poor hygiene, Family history of the disease, Contraception (Intrauterine device/oral contraceptives)	Lower abdominal pain, Bleeding per vagina, Discharge per vagina, Itching, Weight loss, Swelling of cervix, Post coital bleeding (spotting or bleeding unrelated to menstruation that occurs during or after sexual intercourse)	2 Years	3Years	No	No	Yes	Don't know	Blood	Blood test	Genital warts	Cervical carcinoma	Don't know	11-29 Years	No	No	Yes	Two	0.5	Yes	high cost, Inadequate information	Medical school teachings, Books, Social media, Internet, Television
2019-12-20 21:42:25	Agree	Yes	University of Jordan	Male	19	3th years	501- 1000	Rural	Jordanian	No	Jarash	Yes	Infection	Multiple sexual partners, Infection with HPV, Poor hygiene	Bleeding per vagina, Discharge per vagina, Menstrual problems, Swelling of cervix, Post coital bleeding (spotting or bleeding unrelated to menstruation that occurs during or after sexual intercourse)	5 Years	2 Years	Don't know	Yes	Yes	Yes	Sexual	PCR (Polymerase chain reaction)	Cervical carcinoma	Genital warts	Don't know	51 and above Years	Yes	No	No	Three	Don't know	No	high cost, Worry about complications	Medical school teachings
2019-12-20 21:44:23	Agree	Yes	University of Jordan	Female	20	3th years	1001 - 1499	Urban	Jordanian	No	Amman	Yes	Infection	Multiple sexual partners, Infection with HPV, Early age of first coitus	Lower abdominal pain, Menstrual problems, Weight loss, Swelling of cervix, Post coital bleeding (spotting or bleeding unrelated to menstruation that occurs during or after sexual intercourse)	Don't know	2 Years	No	Yes	Yes	Yes	Sexual	PCR (Polymerase chain reaction)	Genital warts	Cervical carcinoma	Don't know	11-29 Years	Yes	Yes	No	Don't know	0.7	Yes	Worry about complications, Worry about efficacy of vaccine	Medical school teachings
2019-12-20 21:49:09	Agree	Yes	University of Jordan	Female	19	3th years	More than 2000	Urban	Non-Jordanian	No		Yes	Infection	Multiple sexual partners, Infection with HPV, Contraception (Intrauterine device/oral contraceptives)	Bleeding per vagina, Discharge per vagina, Menstrual problems, Itching, Swelling of cervix, Post coital bleeding (spotting or bleeding unrelated to menstruation that occurs during or after sexual intercourse)	Don't know	Don't know	No	Yes	Yes	Yes	Sexual	Blood test, Pap smear, PCR (Polymerase chain reaction)	Genital warts	Cervical carcinoma	Yes	11-29 Years	Yes	Yes	No	Don't know	Don't know	Yes	Worry about complications, Worry about efficacy of vaccine, Inadequate information	Medical school teachings, Social media
2019-12-20 22:25:16	Agree	Yes	University of Jordan	Male	27	3th years	More than 2000	Urban	Non-Jordanian	No		Yes	Genetic	Multiple sexual partners, Infection with HPV, Poor hygiene, Early age of first coitus, Smoking, Family history of the disease, Old age, Contraception (Intrauterine device/oral contraceptives), Nulliparity (Never married)	Lower abdominal pain, Bleeding per vagina, Fever, Menstrual problems, Swelling of cervix	5 Years	2 Years	Don't know	Don't know	Don't know	Yes	Sexual	Blood test, PCR (Polymerase chain reaction), Biopsy	Genital warts	Cervical carcinoma	Don't know	11-29 Years	Yes	Yes	No	One	0.9	Yes	high cost, Worry about complications, Worry about efficacy of vaccine	Medical school teachings, Newspapers, Books, Internet
2019-12-20 22:54:57	Agree	Yes	University of Jordan	Male	19	3th years	Less than 500	Urban	Jordanian	No	Azarqa	No	Environmental	Infection with HPV	Swelling of cervix	Don't know	Don't know	Don't know	Don't know	Don't know	Don't know	Don't know	Don't know	Don't know	Don't know	Don't know	11-29 Years	Don't know	Don't know	Don't know	Don't know	Don't know	Don't know	Worry about complications	Books
2019-12-20 22:59:54	Agree	Yes	University of Jordan	Female	19	3th years	1500 - 2000	Urban	Jordanian	No	Amman	No	Infection	Multiple sexual partners, Infection with HPV, Poor hygiene, Early age of first coitus, Family history of the disease	Lower abdominal pain, Bleeding per vagina, Fever, Discharge per vagina, Menstrual problems, Itching, Swelling of cervix, Post coital bleeding (spotting or bleeding unrelated to menstruation that occurs during or after sexual intercourse)	3 Years	4 Years	No	Yes	Yes	Yes	Sexual	Blood test, Pap smear, Biopsy	Genital warts	Cervical carcinoma	No	30-50 Years	No	Yes	No	Don't know	0.7	Yes	high cost, Worry about efficacy of vaccine	Medical school teachings, Internet
2019-12-20 23:58:45	Agree	Yes	University of Jordan	Female	19	3th years	More than 2000	Urban	Jordanian	No	Amman	No	Infection	Multiple sexual partners, Infection with HPV, Early age of first coitus	Discharge per vagina	3 Years	5 Years	No	Yes	Yes	Yes	Sexual	Pap smear, PCR (Polymerase chain reaction)	Genital warts	Cervical carcinoma	Don't know	11-29 Years	Don't know	Don't know	Don't know	One	Don't know	Yes	Worry about complications, Inadequate information	Medical school teachings, Internet
2019-12-21 00:30:09	Agree	Yes	University of Jordan	Female	19	3th years	1001 - 1499	Urban	Jordanian	No	Azarqa	No	Infection	Multiple sexual partners, Infection with HPV, Poor hygiene, Family history of the disease	Bleeding per vagina, Menstrual problems, Weight loss, Swelling of cervix, Post coital bleeding (spotting or bleeding unrelated to menstruation that occurs during or after sexual intercourse)	3 Years	5 Years	Yes	Yes	Don't know	Yes	Sexual	Pap smear, Biopsy	Genital warts	Cervical carcinoma	Don't know	11-29 Years	Yes	Don't know	Don't know	Don't know	Don't know	No	Inadequate information	Medical school teachings
2019-12-21 07:17:03	Agree	Yes	Yarmouk University	Male	20	3th years	501- 1000	Rural	Jordanian	No	Irbid	Yes	Genetic	Smoking, Family history of the disease, Old age	Bleeding per vagina, Menstrual problems, Swelling of cervix, Post coital bleeding (spotting or bleeding unrelated to menstruation that occurs during or after sexual intercourse)	Don't know	Don't know	Don't know	Don't know	Don't know	Don't know	Don't know	Don't know	Don't know	Don't know	Don't know	11-29 Years	Don't know	Don't know	Don't know	Don't know	Don't know	Yes	high cost, Worry about complications, Worry about efficacy of vaccine, Inadequate information	Medical school teachings, Books, Social media, Internet, Television
2019-12-21 21:01:26	Agree	Yes	Yarmouk University	Male	21	3th years	501- 1000	Urban	Jordanian	No	Irbid	No	Genetic	Multiple sexual partners, Infection with HPV, Smoking, Old age	Lower abdominal pain, Bleeding per vagina, Discharge per vagina, Menstrual problems, Swelling of cervix, Anemia	Don't know	Don't know	No	Yes	Yes	Yes	Sexual	Blood test	Genital warts	Plantar warts	Don't know	30-50 Years	Don't know	Don't know	Yes	Don't know	Don't know	Don't know	Inadequate information	Medical school teachings, Social media, Internet
2019-12-22 10:23:49	Agree	Yes	Yarmouk University	Female	20	3th years	501- 1000	Urban	Jordanian	No	Irbid	Yes	Environmental	Early age of first coitus	Bleeding per vagina, Discharge per vagina, Post coital bleeding (spotting or bleeding unrelated to menstruation that occurs during or after sexual intercourse)	3 Years	2 Years	No	Don't know	Yes	Yes	Sexual	Blood test, PCR (Polymerase chain reaction), Biopsy	Genital warts	Plantar warts	Yes	30-50 Years	Yes	Yes	Yes	Two	0.5	Yes	high cost	Medical school teachings
2019-12-23 17:50:20	Agree	Yes	Yarmouk University	Female	24	5th years	More than 2000	Urban	Jordanian	No	Ajl'on	Yes	Genetic	Multiple sexual partners	Bleeding per vagina, Menstrual problems, Itching, Weight loss	3 Years	3Years	No	Yes	Yes	Yes	Sexual	Pap smear	Cervical carcinoma	Don't know	Yes	11-29 Years	Don't know	Yes	Yes	Don't know	Don't know	Yes	Worry about complications	Books, Internet
2019-12-25 20:17:35	Agree	Yes	Mutah University	Female	20	3th years	More than 2000	Urban	Jordanian	No	Amman	Yes	Environmental	Multiple sexual partners, Old age	Lower abdominal pain, Fever	3 Years	2 Years	No	No	Yes	Yes	Sexual	Don't know	Genital warts	Plantar warts	Yes	30-50 Years	Yes	Yes	Yes	Two	Don't know	Yes	high cost, Worry about complications, Inadequate information	Medical school teachings
2019-12-25 21:10:29	Agree	Yes	University of Jordan	Female	20	3th years	501- 1000	Urban	Jordanian	No	Amman	Yes	Infection	Multiple sexual partners, Infection with HPV, Smoking, Contraception (Intrauterine device/oral contraceptives)	Bleeding per vagina, Discharge per vagina, Menstrual problems, Itching, Post coital bleeding (spotting or bleeding unrelated to menstruation that occurs during or after sexual intercourse)	Don't know	5 Years	No	Yes	Yes	No	Sexual	Blood test	Cervical carcinoma	Don't know	Yes	0-10 Years	Yes	Don't know	No	One	0.5	No	Inadequate information	Medical school teachings
2019-12-25 21:30:30	Agree	Yes	University of Jordan	Female	20	3th years	More than 2000	Urban	Jordanian	No	Amman	No	Infection	Multiple sexual partners, Infection with HPV, Poor hygiene, Early age of first coitus, Smoking, Family history of the disease, Contraception (Intrauterine device/oral contraceptives)	Lower abdominal pain, Bleeding per vagina, Fever, Discharge per vagina, Menstrual problems, Itching, Weight loss, Swelling of cervix, Post coital bleeding (spotting or bleeding unrelated to menstruation that occurs during or after sexual intercourse), Anemia	5 Years	3Years	No	Yes	Yes	Yes	Sexual	Blood test, Pap smear, PCR (Polymerase chain reaction), Biopsy	Don't know	Don't know	Yes	11-29 Years	Yes	Yes	Yes	Don't know	0.9	Yes	high cost, Inadequate information	Medical school teachings, Social media, Internet
2019-12-25 21:45:48	Agree	Yes	University of Jordan	Female	20	3th years	More than 2000	Urban	Jordanian	No	Amman	No	Infection	Infection with HPV, Family history of the disease	No symptoms, Discharge per vagina, Post coital bleeding (spotting or bleeding unrelated to menstruation that occurs during or after sexual intercourse)	Don't know	Don't know	No	Yes	Yes	Yes	Sexual	Pap smear, PCR (Polymerase chain reaction)	Genital warts	Cervical carcinoma	Don't know	11-29 Years	Don't know	Yes	No	Don't know	Don't know	Yes	high cost, Worry about complications, Worry about efficacy of vaccine	Medical school teachings, Social media, Internet
2019-12-25 21:52:51	Agree	Yes	Mutah University	Female	20	3th years	501- 1000	Urban	Jordanian	No	Amman	No	Infection	Multiple sexual partners, Infection with HPV, Family history of the disease, Contraception (Intrauterine device/oral contraceptives)	Bleeding per vagina, Fever, Discharge per vagina, Menstrual problems, Itching, Swelling of cervix	5 Years	2 Years	Don't know	Don't know	Yes	Yes	Sexual	Blood test, PCR (Polymerase chain reaction), Biopsy	Don't know	Don't know	Yes	11-29 Years	Yes	Yes	No	Don't know	0.7	Yes	Inadequate information	Social media
2019-12-25 22:06:59	Agree	Yes	University of Jordan	Male	20	3th years	More than 2000	Urban	Jordanian	No	Amman	Yes	Infection	Multiple sexual partners, Infection with HPV, Poor hygiene, Family history of the disease, Contraception (Intrauterine device/oral contraceptives)	Lower abdominal pain, Bleeding per vagina, Discharge per vagina, Menstrual problems, Swelling of cervix, Post coital bleeding (spotting or bleeding unrelated to menstruation that occurs during or after sexual intercourse)	2 Years	4 Years	No	Yes	Yes	Yes	Sexual	Pap smear	Don't know	Don't know	Don't know	11-29 Years	Yes	Yes	No	Four	0.9	Yes	high cost, Inadequate information	Medical school teachings, Books, Social media, Internet
2019-12-25 22:10:04	Agree	Yes	University of Jordan	Female	20	3th years	1500 - 2000	Urban	Jordanian	No	Amman	Yes	Infection	Multiple sexual partners, Infection with HPV, Poor hygiene	Bleeding per vagina, Discharge per vagina, Menstrual problems, Swelling of cervix, Post coital bleeding (spotting or bleeding unrelated to menstruation that occurs during or after sexual intercourse)	5 Years	2 Years	No	Yes	Yes	Yes	Sexual	Blood test, PCR (Polymerase chain reaction), Biopsy	Don't know	Don't know	Yes	11-29 Years	Don't know	Yes	Don't know	Don't know	0.9	Don't know	Inadequate information	Medical school teachings, Books
2019-12-25 22:20:25	Agree	Yes	University of Jordan	Female	26	3th years	1001 - 1499	Urban	Non-Jordanian	No		No	Infection	Multiple sexual partners, Infection with HPV, Poor hygiene	No symptoms, Discharge per vagina, Itching	5 Years	3Years	No	Don't know	Yes	Yes	Oro-fecal	Pap smear	Don't know	Don't know	Don't know	11-29 Years	No	Yes	Don't know	Don't know	Don't know	Yes	high cost, Worry about complications	Medical school teachings, Books, Internet
2019-12-25 22:33:55	Agree	Yes	University of Jordan	Female	20	3th years	1001 - 1499	Urban	Jordanian	No	Amman	No	Infection	Multiple sexual partners, Infection with HPV, Family history of the disease, Nulliparity (Never married)	Lower abdominal pain, Bleeding per vagina, Discharge per vagina, Post coital bleeding (spotting or bleeding unrelated to menstruation that occurs during or after sexual intercourse)	2 Years	2 Years	No	Yes	Yes	Yes	Sexual	Pap smear	Cervical carcinoma	Genital warts	Yes	0-10 Years	Don't know	Yes	Yes	Don't know	Don't know	Yes	Inadequate information	Medical school teachings
2019-12-25 22:58:59	Agree	Yes	Jordan University of Science and Technology	Female	20	3th years	More than 2000	Urban	Jordanian	No	Amman	Yes	Infection	Multiple sexual partners, Infection with HPV, Family history of the disease	Discharge per vagina, Itching, Weight loss, Swelling of cervix, Post coital bleeding (spotting or bleeding unrelated to menstruation that occurs during or after sexual intercourse)	3 Years	5 Years	No	Yes	Yes	Yes	Blood	Pap smear	Plantar warts	Cervical carcinoma	Yes	30-50 Years	Don't know	Don't know	No	Don't know	0.9	No	Worry about efficacy of vaccine	Medical school teachings
2019-12-26 00:40:20	Agree	Yes	University of Jordan	Female	21	3th years	More than 2000	Urban	Non-Jordanian	No		No	Infection	Infection with HPV, Poor hygiene, Family history of the disease	Lower abdominal pain, Bleeding per vagina, Discharge per vagina, Menstrual problems, Swelling of cervix	Don't know	Don't know	Don't know	Don't know	Don't know	Don't know	Don't know	Don't know	Don't know	Don't know	Don't know	11-29 Years	Don't know	Don't know	Don't know	Don't know	Don't know	Don't know	Inadequate information	Medical school teachings, Books, Internet
2019-12-26 00:52:12	Agree	Yes	Jordan University of Science and Technology	Male	22	5th years	More than 2000	Urban	Jordanian	No	Irbid	No	Infection	Multiple sexual partners, Infection with HPV, Early age of first coitus	No symptoms, Lower abdominal pain, Bleeding per vagina, Weight loss, Swelling of cervix, Post coital bleeding (spotting or bleeding unrelated to menstruation that occurs during or after sexual intercourse), Anemia	4 Years	5 Years	No	Yes	Yes	Yes	Sexual	Pap smear, PCR (Polymerase chain reaction), Biopsy	Genital warts	Cervical carcinoma	Yes	11-29 Years	Yes	No	Yes	One	0.9	No	high cost	Medical school teachings, Social media, Internet
2019-12-26 11:28:01	Agree	Yes	University of Jordan	Male	20	3th years	More than 2000	Urban	Jordanian	No	Amman	No	Infection	Infection with HPV, Family history of the disease	Discharge per vagina, Menstrual problems, Weight loss	2 Years	2 Years	Yes	Yes	Yes	Yes	Sexual	PCR (Polymerase chain reaction)	Genital warts	Cervical carcinoma	Yes	11-29 Years	No	No	Don't know	Two	0.9	Yes	high cost	Medical school teachings
2019-12-26 16:12:17	Agree	Yes	Mutah University	Female	20	3th years	More than 2000	Urban	Jordanian	No	Amman	Yes	Environmental	Multiple sexual partners, Old age	Lower abdominal pain, Fever	3 Years	2 Years	No	No	Yes	Yes	Sexual	Don't know	Genital warts	Plantar warts	Yes	30-50 Years	Yes	Yes	Yes	Two	Don't know	Yes	high cost, Worry about complications, Inadequate information	Medical school teachings
2019-12-26 19:18:11	Agree	Yes	Jordan University of Science and Technology	Female	24	6th years	1500 - 2000	Urban	Jordanian	No	Irbid	Yes	Environmental	Poor hygiene, Family history of the disease, Old age, Nulliparity (Never married)	Bleeding per vagina, Discharge per vagina, Menstrual problems, Anemia	5 Years	5 Years	No	Yes	Yes	Yes	Sexual	Blood test, Pap smear	Don't know	Don't know	Don't know	30-50 Years	Yes	Yes	No	Don't know	0.5	No	high cost, Inadequate information	Internet
2019-12-26 20:01:35	Agree	Yes	Jordan University of Science and Technology	Male	20	3th years	1001 - 1499	Urban	Jordanian	No	Irbid	Yes	Genetic	Old age	Swelling of cervix	4 Years	2 Years	No	Yes	Yes	Yes	Blood	Blood test	Cervical carcinoma	Cervical carcinoma	No	11-29 Years	No	Yes	Yes	One	0.7	Yes	high cost	Friends
2019-12-26 20:22:12	Agree	Yes	Jordan University of Science and Technology	Female	20	3th years	More than 2000	Urban	Jordanian	No	Amman	Yes	Genetic	Multiple sexual partners, Infection with HPV, Poor hygiene, Family history of the disease, Contraception (Intrauterine device/oral contraceptives)	Bleeding per vagina, Discharge per vagina, Menstrual problems, Anemia	Don't know	2 Years	No	Don't know	Yes	Yes	Sexual	Don't know	Genital warts	Cervical carcinoma	No	51 and above Years	Don't know	Yes	No	Don't know	0.5	Yes	high cost, Inadequate information	Medical school teachings
2019-12-26 20:22:57	Agree	Yes	Jordan University of Science and Technology	Female	20	3th years	1001 - 1499	Urban	Jordanian	No	Irbid	Yes	Infection	Multiple sexual partners, Infection with HPV, Smoking	Lower abdominal pain, Bleeding per vagina, Discharge per vagina, Menstrual problems	Don't know	Don't know	Yes	Yes	Don't know	Yes	Sexual	Blood test, Pap smear, PCR (Polymerase chain reaction)	Genital warts	Cervical carcinoma	Don't know	11-29 Years	Don't know	Yes	No	Don't know	0.9	Yes	high cost, Worry about complications, Worry about efficacy of vaccine, Inadequate information	Medical school teachings
2019-12-26 20:23:18	Agree	Yes	Yarmouk University	Male	20	3th years	501- 1000	Rural	Jordanian	No	Jarash	Yes	Infection	Multiple sexual partners, Infection with HPV, Poor hygiene, Early age of first coitus, Smoking, Family history of the disease, Old age, Contraception (Intrauterine device/oral contraceptives), Nulliparity (Never married)	Lower abdominal pain, Bleeding per vagina, Discharge per vagina, Menstrual problems, Itching, Swelling of cervix, Post coital bleeding (spotting or bleeding unrelated to menstruation that occurs during or after sexual intercourse), Anemia	3 Years	2 Years	Yes	Yes	Yes	Yes	Sexual	Blood test, Pap smear	Plantar warts	Genital warts	Yes	11-29 Years	Yes	No	Yes	Three	Don't know	Yes	Inadequate information	Medical school teachings, Internet
2019-12-26 20:24:46	Agree	Yes	Jordan University of Science and Technology	Male	20	3th years	501- 1000	Urban	Jordanian	No	Irbid	Yes	Genetic	Infection with HPV, Family history of the disease	Bleeding per vagina, Discharge per vagina, Menstrual problems, Weight loss, Swelling of cervix, Post coital bleeding (spotting or bleeding unrelated to menstruation that occurs during or after sexual intercourse)	Don't know	Don't know	Yes	Yes	Don't know	Yes	Sexual	PCR (Polymerase chain reaction)	Genital warts	Cervical carcinoma	Yes	51 and above Years	Don't know	Yes	No	Don't know	Don't know	Yes	high cost, Worry about complications, Worry about efficacy of vaccine, Inadequate information	Medical school teachings, Newspapers, Friends, Books, Social media, Internet, Television
2019-12-26 20:34:36	Agree	Yes	Jordan University of Science and Technology	Female	20	3th years	501- 1000	Urban	Jordanian	No	Irbid	No	Infection	Multiple sexual partners, Infection with HPV, Poor hygiene, Smoking, Family history of the disease, Contraception (Intrauterine device/oral contraceptives)	Lower abdominal pain, Swelling of cervix	Don't know	Don't know	No	Yes	No	Yes	Sexual	Pap smear, PCR (Polymerase chain reaction), Biopsy	Genital warts	Cervical carcinoma	Yes	11-29 Years	Yes	Don't know	Don't know	Two	Don't know	Yes	high cost, Inadequate information	Medical school teachings, Internet
2019-12-26 20:38:22	Agree	Yes	Yarmouk University	Male	19	3th years	501- 1000	Urban	Jordanian	No	Irbid	No	Environmental	Poor hygiene	Lower abdominal pain	2 Years	3Years	Don't know	Don't know	Don't know	Don't know	Don't know	Don't know	Don't know	Don't know	Don't know	51 and above Years	Don't know	Don't know	Don't know	Don't know	Don't know	Don't know	Inadequate information	Television
2019-12-26 20:40:13	Agree	Yes	Yarmouk University	Male	21	3th years	501- 1000	Rural	Jordanian	No	Irbid	No	Genetic	Multiple sexual partners, Infection with HPV, Early age of first coitus, Smoking, Old age	Bleeding per vagina, Discharge per vagina, Menstrual problems, Swelling of cervix, Post coital bleeding (spotting or bleeding unrelated to menstruation that occurs during or after sexual intercourse)	4 Years	5 Years	No	No	Don't know	Don't know	Don't know	Don't know	Don't know	Don't know	Don't know	30-50 Years	Don't know	Don't know	Don't know	Don't know	Don't know	Don't know	Worry about efficacy of vaccine	Medical school teachings, Friends, Social media
2019-12-26 20:46:03	Agree	Yes	Albalqa University	Male	20	3th years	1500 - 2000	Urban	Jordanian	No	Amman	Yes	Infection	Multiple sexual partners, Infection with HPV, Smoking, Family history of the disease, Contraception (Intrauterine device/oral contraceptives)	Bleeding per vagina, Discharge per vagina, Menstrual problems, Itching, Post coital bleeding (spotting or bleeding unrelated to menstruation that occurs during or after sexual intercourse)	Don't know	Don't know	Don't know	Yes	Yes	Don't know	Sexual	Blood test, PCR (Polymerase chain reaction)	Don't know	Don't know	Don't know	30-50 Years	Don't know	Yes	Don't know	Don't know	Don't know	Don't know	high cost	Medical school teachings
2019-12-26 20:49:51	Agree	Yes	Albalqa University	Male	20	3th years	More than 2000	Urban	Jordanian	No	Amman	Yes	Infection	Multiple sexual partners, Infection with HPV, Smoking	No symptoms	Don't know	Don't know	Don't know	Don't know	Don't know	Don't know	Sexual	Pap smear	Don't know	Don't know	Don't know	30-50 Years	Don't know	Don't know	Don't know	Don't know	Don't know	Yes	high cost, Inadequate information	Medical school teachings
2019-12-26 20:52:22	Agree	Yes	Jordan University of Science and Technology	Male	20	3th years	1001 - 1499	Urban	Jordanian	No	Irbid	Yes	Genetic	Multiple sexual partners, Infection with HPV, Early age of first coitus, Smoking, Family history of the disease, Old age	No symptoms	3 Years	3Years	No	Yes	Yes	Yes	Oro-fecal	Pap smear	Plantar warts	Don't know	Yes	30-50 Years	Yes	Yes	Yes	Two	Don't know	Yes	Worry about complications	Medical school teachings, Friends
2019-12-26 20:53:06	Agree	Yes	Albalqa University	Female	22	3th years	More than 2000	Urban	Jordanian	No	Amman	Yes	Infection	Infection with HPV, Family history of the disease	Discharge per vagina, Itching	4 Years	2 Years	No	Yes	Yes	Yes	Sexual	Pap smear	Genital warts	Cervical carcinoma	Yes	30-50 Years	Don't know	Yes	No	Three	0.7	Yes	Worry about complications	Medical school teachings
2019-12-26 20:55:28	Agree	Yes	Albalqa University	Female	21	4th years	501- 1000	Urban	Jordanian	No	Salt	Yes	Genetic	Multiple sexual partners, Infection with HPV, Early age of first coitus, Smoking, Family history of the disease, Old age, Contraception (Intrauterine device/oral contraceptives), Nulliparity (Never married)	Fever, Discharge per vagina, Menstrual problems, Weight loss, Swelling of cervix, Post coital bleeding (spotting or bleeding unrelated to menstruation that occurs during or after sexual intercourse)	4 Years	2 Years	No	Yes	Yes	Yes	Sexual	Pap smear	Cervical carcinoma	Genital warts	Don't know	11-29 Years	Yes	No	Don't know	Two	0.9	Yes	Inadequate information	Medical school teachings, Internet
2019-12-26 20:56:23	Agree	Yes	Jordan University of Science and Technology	Male	20	3th years	1500 - 2000	Urban	Jordanian	No	Irbid	No	Genetic	Infection with HPV, Poor hygiene, Smoking, Family history of the disease, Contraception (Intrauterine device/oral contraceptives)	Lower abdominal pain, Bleeding per vagina, Fever, Discharge per vagina, Menstrual problems, Weight loss, Swelling of cervix, Post coital bleeding (spotting or bleeding unrelated to menstruation that occurs during or after sexual intercourse), Anemia	Don't know	Don't know	No	No	Yes	Yes	Oro-fecal	PCR (Polymerase chain reaction), Biopsy	Cervical carcinoma	Genital warts	Don't know	30-50 Years	Yes	Don't know	No	Don't know	Don't know	Don't know	Inadequate information	Medical school teachings, Internet
2019-12-26 20:58:00	Agree	Yes	Albalqa University	Male	21	3th years	1001 - 1499	Urban	Jordanian	No	Amman	No	Infection	Multiple sexual partners, Infection with HPV, Early age of first coitus	Bleeding per vagina, Swelling of cervix, Post coital bleeding (spotting or bleeding unrelated to menstruation that occurs during or after sexual intercourse)	3 Years	5 Years	No	Yes	Yes	Yes	Sexual	Blood test, Pap smear, Biopsy	Genital warts	Cervical carcinoma	Yes	11-29 Years	Yes	No	Yes	One	0.7	Yes	Inadequate information	Medical school teachings, Friends
2019-12-26 21:00:49	Agree	Yes	Albalqa University	Male	20	3th years	1500 - 2000	Rural	Jordanian	No	Amman	No	Genetic	Infection with HPV, Family history of the disease, Old age, Contraception (Intrauterine device/oral contraceptives)	Bleeding per vagina, Discharge per vagina, Menstrual problems, Anemia	Don't know	Don't know	No	Don't know	Yes	Yes	Blood	Blood test	Don't know	Don't know	No	0-10 Years	Yes	Yes	No	Don't know	0.5	Yes	high cost	Medical school teachings
2019-12-26 21:01:10	Agree	Yes	Yarmouk University	Female	22	4th years	1001 - 1499	Urban	Jordanian	No	Irbid	Yes	Genetic	Infection with HPV, Early age of first coitus	No symptoms, Bleeding per vagina, Fever, Swelling of cervix, Anemia	2 Years	3Years	No	Yes	Yes	Yes	Sexual	Blood test	Genital warts	Genital warts	Don't know	11-29 Years	No	No	Yes	One	1	No	Worry about complications	Social media
2019-12-26 21:01:37	Agree	Yes	Albalqa University	Female	20	3th years	More than 2000	Urban	Jordanian	No	Amman	No	Infection	Infection with HPV, Poor hygiene, Smoking, Family history of the disease, Old age	Lower abdominal pain, Menstrual problems, Swelling of cervix, Post coital bleeding (spotting or bleeding unrelated to menstruation that occurs during or after sexual intercourse)	5 Years	2 Years	Don't know	Yes	No	Yes	Sexual	Pap smear, PCR (Polymerase chain reaction)	Genital warts	Cervical carcinoma	Don't know	30-50 Years	Yes	Don't know	Yes	Don't know	0.7	Yes	high cost	Medical school teachings
2019-12-26 21:01:45	Agree	Yes	Albalqa University	Male	22	4th years	More than 2000	Rural	Jordanian	Yes	Salt	Yes	Infection	Multiple sexual partners, Infection with HPV, Poor hygiene, Smoking, Family history of the disease, Old age	Lower abdominal pain, Bleeding per vagina, Fever, Discharge per vagina, Menstrual problems, Weight loss, Post coital bleeding (spotting or bleeding unrelated to menstruation that occurs during or after sexual intercourse), Anemia	4 Years	3Years	No	Yes	Yes	Yes	Sexual	Pap smear	Genital warts	Cervical carcinoma	Yes	11-29 Years	Yes	Yes	No	Don't know	0.5	Yes	Worry about complications	Books, Social media
2019-12-26 21:11:06	Agree	Yes	Albalqa University	Female	21	4th years	1001 - 1499	Urban	Jordanian	No	Amman	Yes	Infection	Multiple sexual partners, Infection with HPV, Poor hygiene, Smoking, Old age	Bleeding per vagina, Discharge per vagina, Menstrual problems	Don't know	Don't know	Don't know	Don't know	Don't know	Yes	Sexual	Pap smear	Genital warts	Cervical carcinoma	Don't know	11-29 Years	Don't know	Don't know	Don't know	Don't know	Don't know	Don't know	high cost	Social media
2019-12-26 21:17:49	Agree	Yes	Mutah University	Male	21	5th years	More than 2000	Rural	Jordanian	No	Irbid	Yes	Infection	Multiple sexual partners, Infection with HPV, Early age of first coitus, Family history of the disease, Old age, Contraception (Intrauterine device/oral contraceptives)	No symptoms, Bleeding per vagina, Discharge per vagina, Menstrual problems, Weight loss, Swelling of cervix, Post coital bleeding (spotting or bleeding unrelated to menstruation that occurs during or after sexual intercourse), Anemia	Don't know	Don't know	No	Yes	Don't know	Yes	Sexual	Pap smear	Genital warts	Cervical carcinoma	Yes	30-50 Years	Don't know	Don't know	No	Don't know	Don't know	Yes	Worry about efficacy of vaccine	Medical school teachings
2019-12-26 21:23:11	Agree	Yes	Albalqa University	Male	20	3th years	501- 1000	Urban	Jordanian	No	Amman	Yes	Environmental	Multiple sexual partners, Infection with HPV, Smoking, Family history of the disease	Bleeding per vagina, Discharge per vagina, Menstrual problems	Don't know	Don't know	Don't know	Don't know	Yes	Yes	Don't know	Biopsy	Genital warts	Plantar warts	Don't know	30-50 Years	Yes	Don't know	No	Don't know	Don't know	Don't know	Inadequate information	Internet
2019-12-26 21:32:04	Agree	Yes	Albalqa University	Female	21	4th years	501- 1000	Urban	Jordanian	No	Salt	No	Infection	Multiple sexual partners, Infection with HPV, Poor hygiene, Early age of first coitus, Smoking	Bleeding per vagina, Discharge per vagina, Weight loss, Post coital bleeding (spotting or bleeding unrelated to menstruation that occurs during or after sexual intercourse)	2 Years	2 Years	Yes	Yes	No	Yes	Sexual	Pap smear	Genital warts	Cervical carcinoma	Don't know	11-29 Years	No	No	No	Two	0.9	No	high cost, Worry about complications, Inadequate information	Medical school teachings
2019-12-26 21:32:11	Agree	Yes	Albalqa University	Female	20	3th years	1001 - 1499	Urban	Jordanian	No	Salt	No	Infection	Multiple sexual partners, Infection with HPV, Poor hygiene, Early age of first coitus, Smoking, Family history of the disease	Bleeding per vagina, Discharge per vagina, Weight loss, Swelling of cervix, Post coital bleeding (spotting or bleeding unrelated to menstruation that occurs during or after sexual intercourse), Anemia	3 Years	Don't know	No	Yes	Yes	Yes	Sexual	PCR (Polymerase chain reaction)	Genital warts	Cervical carcinoma	Yes	11-29 Years	Yes	Yes	No	Two	Don't know	Yes	high cost, Worry about complications	Medical school teachings
2019-12-26 21:33:07	Agree	Yes	Mutah University	Male	22	5th years	More than 2000	Urban	Jordanian	No	Salt	No	Environmental	Infection with HPV, Family history of the disease, Contraception (Intrauterine device/oral contraceptives)	Anemia	Don't know	Don't know	Don't know	Don't know	Don't know	Don't know	Sexual	Pap smear, PCR (Polymerase chain reaction)	Don't know	Don't know	Don't know	30-50 Years	Don't know	Don't know	Don't know	Don't know	Don't know	Don't know	Inadequate information	Internet
2019-12-26 21:38:17	Agree	Yes	Mutah University	Male	21	5th years	1001 - 1499	Urban	Jordanian	No	Azarqa	Yes	Infection	Multiple sexual partners, Infection with HPV, Early age of first coitus, Smoking, Contraception (Intrauterine device/oral contraceptives)	No symptoms, Bleeding per vagina, Swelling of cervix, Post coital bleeding (spotting or bleeding unrelated to menstruation that occurs during or after sexual intercourse)	Don't know	Don't know	No	No	Yes	Yes	Sexual	Pap smear	Plantar warts	Cervical carcinoma	Yes	11-29 Years	Don't know	Don't know	Don't know	Don't know	0.9	Yes	Worry about complications	Medical school teachings, Internet
2019-12-26 21:38:48	Agree	Yes	Mutah University	Male	23	5th years	1001 - 1499	Rural	Jordanian	No	Azarqa	Yes	Infection	Multiple sexual partners, Infection with HPV, Poor hygiene, Family history of the disease	Bleeding per vagina, Discharge per vagina, Itching, Weight loss, Post coital bleeding (spotting or bleeding unrelated to menstruation that occurs during or after sexual intercourse), Anemia	5 Years	3Years	No	Yes	Yes	Yes	Sexual	Pap smear, PCR (Polymerase chain reaction)	Genital warts	Cervical carcinoma	Don't know	11-29 Years	Don't know	Don't know	No	Don't know	Don't know	No	high cost	Medical school teachings
2019-12-26 21:40:56	Agree	Yes	Albalqa University	Female	22	4th years	More than 2000	Urban	Jordanian	No	Salt	Yes	Infection	Multiple sexual partners, Infection with HPV, Poor hygiene, Early age of first coitus, Smoking, Family history of the disease, Old age	No symptoms, Bleeding per vagina, Discharge per vagina, Menstrual problems, Swelling of cervix, Post coital bleeding (spotting or bleeding unrelated to menstruation that occurs during or after sexual intercourse), Anemia	Don't know	Don't know	Don't know	Yes	Yes	Yes	Sexual	Pap smear	Genital warts	Cervical carcinoma	Yes	11-29 Years	Don't know	Yes	Don't know	Don't know	Don't know	No	high cost, Inadequate information	Medical school teachings, Newspapers, Friends, Social media, Internet, Television
2019-12-26 21:42:03	Agree	Yes	Jordan University of Science and Technology	Female	20	3th years	1500 - 2000	Rural	Jordanian	No	Irbid	No	Genetic	Family history of the disease	Bleeding per vagina, Swelling of cervix	Don't know	Don't know	No	No	Yes	Don't know	Environmental	Don't know	Don't know	Don't know	Yes	0-10 Years	Yes	Don't know	Don't know	Don't know	0.5	Don't know	Inadequate information	Medical school teachings, Books, Internet
2019-12-26 21:43:11	Agree	Yes	Albalqa University	Female	20	3th years	1500 - 2000	Urban	Jordanian	No	Madaba	Yes	Infection	Infection with HPV	No symptoms	2 Years	3Years	Yes	Yes	Don't know	Yes	Don't know	Pap smear	Cervical carcinoma	Genital warts	Don't know	30-50 Years	Don't know	Yes	No	Don't know	Don't know	Yes	Inadequate information	Medical school teachings
2019-12-26 21:44:09	Agree	Yes	Jordan University of Science and Technology	Male	20	3th years	More than 2000	Rural	Jordanian	No	Irbid	Yes	Infection	Multiple sexual partners, Infection with HPV, Poor hygiene	Discharge per vagina, Menstrual problems, Weight loss, Anemia	5 Years	2 Years	No	Yes	Yes	Yes	Sexual	Pap smear, PCR (Polymerase chain reaction)	Cervical carcinoma	Genital warts	Don't know	0-10 Years	Yes	Yes	No	Don't know	Don't know	Don't know	Inadequate information	Medical school teachings
2019-12-26 21:45:20	Agree	Yes	Jordan University of Science and Technology	Male	19	3th years	1001 - 1499	Urban	Jordanian	No	Irbid	Yes	Infection	Multiple sexual partners, Infection with HPV, Poor hygiene, Smoking	Bleeding per vagina, Discharge per vagina, Menstrual problems, Itching, Swelling of cervix, Post coital bleeding (spotting or bleeding unrelated to menstruation that occurs during or after sexual intercourse)	Don't know	Don't know	No	Yes	Yes	Yes	Sexual	Blood test, Pap smear	Don't know	Don't know	Don't know	30-50 Years	No	Yes	No	Don't know	Don't know	No	Inadequate information	Medical school teachings, Newspapers, Friends, Books, Social media, Internet, Television
2019-12-26 21:48:10	Agree	Yes	Mutah University	Female	22	5th years	501- 1000	Rural	Jordanian	No	Alkarak	No	Infection	Multiple sexual partners, Infection with HPV, Poor hygiene, Early age of first coitus, Smoking, Family history of the disease, Old age, Contraception (Intrauterine device/oral contraceptives), Nulliparity (Never married)	Bleeding per vagina, Discharge per vagina, Weight loss, Post coital bleeding (spotting or bleeding unrelated to menstruation that occurs during or after sexual intercourse), Anemia	Don't know	Don't know	No	Don't know	Yes	Yes	Don't know	Pap smear, PCR (Polymerase chain reaction)	Plantar warts	Genital warts	Don't know	30-50 Years	Don't know	Yes	Yes	Don't know	Don't know	No	high cost, Worry about complications, Worry about efficacy of vaccine, Inadequate information	Medical school teachings, Books, Social media
2019-12-26 21:50:26	Agree	Yes	Albalqa University	Male	21	3th years	More than 2000	Urban	Jordanian	No	Amman	No	Infection	Multiple sexual partners, Infection with HPV, Poor hygiene, Early age of first coitus, Contraception (Intrauterine device/oral contraceptives)	Bleeding per vagina, Discharge per vagina, Menstrual problems, Weight loss, Swelling of cervix, Post coital bleeding (spotting or bleeding unrelated to menstruation that occurs during or after sexual intercourse)	Don't know	Don't know	Don't know	Don't know	Don't know	Don't know	Blood	Blood test, PCR (Polymerase chain reaction)	Don't know	Don't know	Don't know	30-50 Years	Don't know	Don't know	Don't know	Don't know	Don't know	Don't know	high cost	Medical school teachings
2019-12-26 21:51:45	Agree	Yes	Mutah University	Female	23	5th years	More than 2000	Urban	Jordanian	No	Alkarak	No	Genetic	Multiple sexual partners, Infection with HPV, Smoking, Family history of the disease, Contraception (Intrauterine device/oral contraceptives)	Lower abdominal pain, Menstrual problems, Weight loss, Post coital bleeding (spotting or bleeding unrelated to menstruation that occurs during or after sexual intercourse), Anemia	3 Years	5 Years	No	Yes	Yes	Yes	Sexual	Pap smear	Cervical carcinoma	Genital warts	Don't know	11-29 Years	Don't know	Yes	No	One	1	No	Worry about efficacy of vaccine, Inadequate information	Medical school teachings, Newspapers, Social media, Internet, Television
2019-12-26 21:56:15	Agree	Yes	Mutah University	Female	23	5th years	501- 1000	Rural	Jordanian	Yes	Irbid	Yes	Genetic	Multiple sexual partners, Infection with HPV, Early age of first coitus, Smoking, Contraception (Intrauterine device/oral contraceptives)	No symptoms, Bleeding per vagina, Discharge per vagina, Menstrual problems, Itching, Swelling of cervix, Post coital bleeding (spotting or bleeding unrelated to menstruation that occurs during or after sexual intercourse), Anemia	Don't know	Don't know	Don't know	Don't know	Yes	Yes	Sexual	Pap smear, PCR (Polymerase chain reaction), Don't know	Don't know	Don't know	Don't know	11-29 Years	Don't know	Don't know	Don't know	Don't know	Don't know	Yes	high cost, Worry about complications, Worry about efficacy of vaccine, Inadequate information	Medical school teachings
2019-12-26 22:13:59	Agree	Yes	Jordan University of Science and Technology	Male	19	3th years	501- 1000	Urban	Jordanian	No	Amman	Yes	Genetic	Multiple sexual partners, Infection with HPV, Poor hygiene, Early age of first coitus, Smoking, Family history of the disease, Old age, Contraception (Intrauterine device/oral contraceptives), Nulliparity (Never married)	Lower abdominal pain, Bleeding per vagina, Weight loss, Swelling of cervix	5 Years	5 Years	Yes	Yes	Yes	Yes	Sexual	Pap smear	Genital warts	Cervical carcinoma	Yes	0-10 Years	Yes	No	Yes	Four	0.5	No	high cost, Worry about complications, Worry about efficacy of vaccine, Inadequate information	Medical school teachings, Social media
2019-12-26 22:23:32	Agree	Yes	Albalqa University	Male	21	3th years	1500 - 2000	Rural	Jordanian	No	Irbid	No	Infection	Infection with HPV, Family history of the disease, Old age	Lower abdominal pain, Discharge per vagina, Weight loss, Swelling of cervix	4 Years	2 Years	No	No	Yes	Yes	Sexual	Pap smear	Cervical carcinoma	Plantar warts	Don't know	11-29 Years	No	Yes	No	Don't know	Don't know	No	high cost, Worry about efficacy of vaccine	Internet
2019-12-26 22:24:39	Agree	Yes	Albalqa University	Female	23	4th years	1500 - 2000	Urban	Jordanian	No	Amman	Yes	Infection	Multiple sexual partners, Infection with HPV, Smoking, Family history of the disease, Contraception (Intrauterine device/oral contraceptives)	Lower abdominal pain, Bleeding per vagina, Menstrual problems, Weight loss, Swelling of cervix, Post coital bleeding (spotting or bleeding unrelated to menstruation that occurs during or after sexual intercourse)	Don't know	Don't know	Don't know	Don't know	Don't know	Don't know	Sexual	Don't know	Genital warts	Cervical carcinoma	Don't know	11-29 Years	Don't know	Don't know	Don't know	Don't know	Don't know	Don't know	high cost, Worry about complications, Inadequate information	Medical school teachings
2019-12-26 22:31:51	Agree	Yes	Jordan University of Science and Technology	Female	20	3th years	More than 2000	Urban	Jordanian	No	Amman	No	Environmental	Infection with HPV, Poor hygiene, Family history of the disease, Old age, Contraception (Intrauterine device/oral contraceptives)	Bleeding per vagina, Discharge per vagina, Menstrual problems, Weight loss, Swelling of cervix, Post coital bleeding (spotting or bleeding unrelated to menstruation that occurs during or after sexual intercourse), Anemia	5 Years	2 Years	No	Yes	Yes	Yes	Sexual	Blood test, Pap smear	Cervical carcinoma	Genital warts	Don't know	30-50 Years	Yes	Yes	No	Two	Don't know	No	Worry about efficacy of vaccine, Inadequate information	Medical school teachings, Social media, Television
2019-12-26 22:35:50	Agree	Yes	Jordan University of Science and Technology	Male	19	3th years	1500 - 2000	Rural	Jordanian	No	Irbid	Yes	Infection	Multiple sexual partners, Infection with HPV, Poor hygiene, Old age, Contraception (Intrauterine device/oral contraceptives)	Lower abdominal pain, Bleeding per vagina, Discharge per vagina, Menstrual problems, Swelling of cervix, Post coital bleeding (spotting or bleeding unrelated to menstruation that occurs during or after sexual intercourse)	Don't know	Don't know	Don't know	Yes	Don't know	Don't know	Don't know	Blood test, Pap smear	Don't know	Don't know	Yes	30-50 Years	Don't know	Don't know	Don't know	Don't know	Don't know	Yes	high cost, Worry about complications	Medical school teachings, Social media, Internet
2019-12-26 22:41:15	Agree	Yes	Jordan University of Science and Technology	Female	21	3th years	501- 1000	Rural	Jordanian	No	Irbid	Yes	Infection	Infection with HPV, Early age of first coitus, Family history of the disease, Old age, Nulliparity (Never married)	Bleeding per vagina, Discharge per vagina, Menstrual problems, Weight loss, Swelling of cervix, Anemia	Don't know	Don't know	Don't know	Don't know	Don't know	Don't know	Sexual	PCR (Polymerase chain reaction), Biopsy	Genital warts	Cervical carcinoma	Don't know	11-29 Years	Yes	Yes	Don't know	Don't know	Don't know	Don't know	high cost, Inadequate information	Medical school teachings, Newspapers, Social media, Internet, Television
2019-12-26 22:45:59	Agree	Yes	Albalqa University	Female	21	4th years	501- 1000	Urban	Jordanian	No	Azarqa	Yes	Infection	Multiple sexual partners, Infection with HPV, Smoking	Bleeding per vagina, Discharge per vagina, Post coital bleeding (spotting or bleeding unrelated to menstruation that occurs during or after sexual intercourse), Anemia	5 Years	Don't know	No	Don't know	Yes	Yes	Sexual	Pap smear	Plantar warts	Genital warts	Don't know	11-29 Years	Don't know	Yes	No	Don't know	0.7	No	Inadequate information	Medical school teachings
2019-12-26 23:52:02	Agree	Yes	Albalqa University	Male	20	3th years	1500 - 2000	Urban	Jordanian	No	Amman	Yes	Infection	Infection with HPV, Smoking, Old age	Bleeding per vagina, Discharge per vagina, Menstrual problems, Post coital bleeding (spotting or bleeding unrelated to menstruation that occurs during or after sexual intercourse)	5 Years	2 Years	No	Don't know	Yes	Yes	Don't know	Pap smear, Biopsy	Cervical carcinoma	Don't know	Don't know	11-29 Years	Yes	Yes	Don't know	Three	0.7	No	Inadequate information	Medical school teachings
2019-12-26 23:55:54	Agree	Yes	Yarmouk University	Female	23	6th years	1500 - 2000	Rural	Jordanian	No	Irbid	No	Infection	Multiple sexual partners, Infection with HPV, Early age of first coitus, Family history of the disease	No symptoms, Bleeding per vagina, Discharge per vagina, Itching, Weight loss, Swelling of cervix, Post coital bleeding (spotting or bleeding unrelated to menstruation that occurs during or after sexual intercourse), Anemia	3 Years	5 Years	Yes	Yes	Yes	Yes	Sexual	Pap smear	Genital warts	Cervical carcinoma	Yes	11-29 Years	Don't know	Yes	Yes	Three	Don't know	Yes	high cost, Worry about complications, Inadequate information	Medical school teachings
2019-12-27 00:08:25	Agree	Yes	Jordan University of Science and Technology	Female	20	3th years	More than 2000	Urban	Non-Jordanian	No		No	Infection	Infection with HPV, Family history of the disease	Lower abdominal pain, Bleeding per vagina, Discharge per vagina, Weight loss, Post coital bleeding (spotting or bleeding unrelated to menstruation that occurs during or after sexual intercourse)	Don't know	Don't know	No	Yes	Yes	Yes	Sexual	Don't know	Plantar warts	Cervical carcinoma	Yes	11-29 Years	Don't know	Yes	Don't know	Don't know	Don't know	Yes	high cost, Worry about complications, Worry about efficacy of vaccine, Inadequate information	Medical school teachings, Books, Social media, Internet
2019-12-27 00:11:50	Agree	Yes	Yarmouk University	Female	23	6th years	501- 1000	Urban	Jordanian	No	Irbid	No	Infection	Multiple sexual partners, Infection with HPV, Early age of first coitus, Smoking, Contraception (Intrauterine device/oral contraceptives)	No symptoms, Bleeding per vagina, Weight loss, Swelling of cervix, Post coital bleeding (spotting or bleeding unrelated to menstruation that occurs during or after sexual intercourse), Anemia	3 Years	5 Years	Yes	Yes	Yes	Yes	Sexual	Pap smear, Biopsy	Genital warts	Cervical carcinoma	No	11-29 Years	Yes	No	Yes	Two	1	Yes	Inadequate information	Medical school teachings, Friends, Books
2019-12-27 00:14:18	Agree	Yes	Hashemite University	Female	21	4th years	501- 1000	Urban	Jordanian	No	Amman	No	Infection	Multiple sexual partners, Infection with HPV, Early age of first coitus, Old age	Lower abdominal pain, Bleeding per vagina, Fever, Discharge per vagina, Menstrual problems, Itching, Weight loss, Swelling of cervix, Post coital bleeding (spotting or bleeding unrelated to menstruation that occurs during or after sexual intercourse), Anemia	4 Years	2 Years	No	Yes	Don't know	Yes	Sexual	Pap smear	Genital warts	Cervical carcinoma	Yes	30-50 Years	Don't know	Yes	Don't know	One	0.9	Yes	Worry about efficacy of vaccine, Inadequate information	Medical school teachings
2019-12-27 00:42:54	Agree	Yes	Albalqa University	Female	22	5th years	1500 - 2000	Urban	Jordanian	No	Salt	Yes	Infection	Multiple sexual partners, Infection with HPV, Poor hygiene, Smoking	No symptoms, Discharge per vagina, Weight loss, Post coital bleeding (spotting or bleeding unrelated to menstruation that occurs during or after sexual intercourse), Anemia	2 Years	5 Years	No	Yes	No	Yes	Sexual	Pap smear, Biopsy	Genital warts	Cervical carcinoma	No	11-29 Years	Yes	Yes	No	Three	0.9	No	Inadequate information	Medical school teachings
2019-12-27 01:07:54	Agree	Yes	Jordan University of Science and Technology	Female	20	3th years	More than 2000	Urban	Jordanian	No	Irbid	Yes	Infection	Multiple sexual partners, Infection with HPV, Poor hygiene, Old age, Contraception (Intrauterine device/oral contraceptives)	Lower abdominal pain, Bleeding per vagina, Fever, Discharge per vagina, Menstrual problems, Itching, Weight loss, Swelling of cervix, Post coital bleeding (spotting or bleeding unrelated to menstruation that occurs during or after sexual intercourse), Anemia	3 Years	2 Years	No	No	No	Yes	Sexual	Blood test, Pap smear	Genital warts	Cervical carcinoma	Don't know	30-50 Years	Don't know	Don't know	No	Don't know	Don't know	Don't know	high cost, Worry about complications	Medical school teachings, Books, Social media, Internet, Television
2019-12-27 01:53:02	Agree	Yes	Albalqa University	Male	20	3th years	501- 1000	Rural	Jordanian	No	Irbid	No	Infection	Multiple sexual partners, Infection with HPV, Poor hygiene, Smoking, Family history of the disease, Old age, Contraception (Intrauterine device/oral contraceptives)	Lower abdominal pain, Bleeding per vagina, Fever, Menstrual problems, Weight loss, Swelling of cervix, Anemia	Don't know	Don't know	No	Yes	Yes	Yes	Sexual	Pap smear, PCR (Polymerase chain reaction)	Cervical carcinoma	Don't know	Don't know	11-29 Years	Yes	Yes	Don't know	Don't know	Don't know	Don't know	Worry about efficacy of vaccine, Inadequate information	Medical school teachings, Books, Social media, Internet
2019-12-27 02:24:14	Agree	Yes	Albalqa University	Female	20	3th years	1001 - 1499	Urban	Jordanian	No	Salt	No	Infection	Infection with HPV	Bleeding per vagina	Don't know	Don't know	No	Yes	Yes	Yes	Don't know	Pap smear	Don't know	Don't know	Yes	11-29 Years	No	Yes	No	Three	Don't know	Yes	high cost	Medical school teachings
2019-12-27 03:39:42	Agree	Yes	Albalqa University	Male	20	3th years	Less than 500	Urban	Jordanian	No	Amman	Yes	Infection	Multiple sexual partners, Infection with HPV	Menstrual problems, Weight loss	Don't know	Don't know	No	No	Yes	Yes	Sexual	Don't know	Don't know	Cervical carcinoma	Yes	11-29 Years	Don't know	Don't know	Don't know	Don't know	Don't know	Don't know	high cost, Inadequate information	Medical school teachings
2019-12-27 08:29:46	Agree	Yes	Albalqa University	Female	23	4th years	1500 - 2000	Urban	Jordanian	No	Amman	Yes	Infection	Multiple sexual partners, Infection with HPV, Poor hygiene, Early age of first coitus	Discharge per vagina, Itching, Weight loss, Post coital bleeding (spotting or bleeding unrelated to menstruation that occurs during or after sexual intercourse)	5 Years	Don't know	Yes	Yes	Yes	Don't know	Sexual	Pap smear	Genital warts	Cervical carcinoma	Don't know	0-10 Years	Yes	No	Don't know	Don't know	Don't know	Yes	high cost, Inadequate information	Medical school teachings, Social media, Internet, Television
2019-12-27 10:07:29	Agree	Yes	Jordan University of Science and Technology	Female	20	3th years	More than 2000	Urban	Jordanian	No	Irbid	Yes	Genetic	Multiple sexual partners, Infection with HPV, Smoking, Family history of the disease	Lower abdominal pain, Bleeding per vagina, Discharge per vagina, Menstrual problems, Itching, Swelling of cervix, Post coital bleeding (spotting or bleeding unrelated to menstruation that occurs during or after sexual intercourse), Anemia	5 Years	2 Years	No	Don't know	Don't know	Yes	Sexual	Blood test, Pap smear, PCR (Polymerase chain reaction)	Genital warts	Cervical carcinoma	Yes	11-29 Years	Yes	No	Don't know	Three	Don't know	Yes	high cost, Worry about complications, Worry about efficacy of vaccine	Medical school teachings, Internet
2019-12-27 10:10:43	Agree	Yes	Albalqa University	Male	20	3th years	501- 1000	Urban	Jordanian	No	Amman	No	Infection	Infection with HPV, Smoking, Family history of the disease, Old age	Bleeding per vagina, Fever, Menstrual problems, Weight loss, Post coital bleeding (spotting or bleeding unrelated to menstruation that occurs during or after sexual intercourse), Anemia	3 Years	2 Years	Yes	Yes	Yes	Yes	Environmental	Don't know	Cervical carcinoma	Cervical carcinoma	Yes	30-50 Years	Don't know	Yes	Yes	Don't know	0.9	Yes	Worry about efficacy of vaccine	Medical school teachings, Friends, Books, Internet
2019-12-27 10:55:18	Agree	Yes	Jordan University of Science and Technology	Female	20	3th years	More than 2000	Urban	Jordanian	No	Amman	Yes	Infection	Multiple sexual partners, Infection with HPV, Family history of the disease	Bleeding per vagina, Discharge per vagina, Itching, Weight loss, Post coital bleeding (spotting or bleeding unrelated to menstruation that occurs during or after sexual intercourse), Anemia	Don't know	Don't know	No	Yes	Yes	Yes	Sexual	Pap smear, PCR (Polymerase chain reaction), Biopsy	Plantar warts	Cervical carcinoma	Yes	11-29 Years	Don't know	Yes	Don't know	Don't know	Don't know	Yes	high cost	Medical school teachings
2019-12-27 11:04:46	Agree	Yes	Jordan University of Science and Technology	Male	20	3th years	501- 1000	Urban	Jordanian	No	Irbid	No	Genetic	Infection with HPV	Bleeding per vagina	Don't know	Don't know	No	No	No	Yes	Sexual	PCR (Polymerase chain reaction)	Cervical carcinoma	Genital warts	Don't know	11-29 Years	Yes	Yes	No	Two	0.7	Yes	high cost	Medical school teachings
2019-12-27 13:08:28	Agree	Yes	Jordan University of Science and Technology	Female	24	6th years	1001 - 1499	Urban	Jordanian	No	Irbid	Yes	Infection	Multiple sexual partners, Infection with HPV, Early age of first coitus, Family history of the disease	Bleeding per vagina, Discharge per vagina, Menstrual problems, Weight loss, Swelling of cervix, Post coital bleeding (spotting or bleeding unrelated to menstruation that occurs during or after sexual intercourse)	2 Years	2 Years	Yes	Yes	No	Yes	Sexual	Pap smear	Cervical carcinoma	Plantar warts	Yes	11-29 Years	Don't know	No	Don't know	One	1	Yes	high cost, Inadequate information	Medical school teachings
2019-12-27 13:21:59	Agree	Yes	Jordan University of Science and Technology	Male	20	3th years	More than 2000	Urban	Jordanian	No	Irbid	Yes	Infection	Multiple sexual partners, Infection with HPV, Poor hygiene, Old age	Bleeding per vagina, Discharge per vagina, Menstrual problems, Itching, Weight loss, Swelling of cervix, Post coital bleeding (spotting or bleeding unrelated to menstruation that occurs during or after sexual intercourse)	Don't know	Don't know	No	Yes	Yes	Yes	Sexual	PCR (Polymerase chain reaction), Biopsy	Genital warts	Cervical carcinoma	Yes	11-29 Years	No	Yes	No	Don't know	0.9	No	high cost	Medical school teachings, Newspapers, Friends, Social media, Internet
2019-12-27 13:28:11	Agree	Yes	Mutah University	Female	23	5th years	Less than 500	Rural	Jordanian	No	Ma'an	Yes	Infection	Multiple sexual partners, Infection with HPV, Poor hygiene, Early age of first coitus, Smoking, Family history of the disease, Contraception (Intrauterine device/oral contraceptives)	Lower abdominal pain, Bleeding per vagina, Discharge per vagina, Menstrual problems, Weight loss, Swelling of cervix, Post coital bleeding (spotting or bleeding unrelated to menstruation that occurs during or after sexual intercourse), Anemia	3 Years	5 Years	No	Don't know	Yes	Yes	Sexual	PCR (Polymerase chain reaction)	Genital warts	Cervical carcinoma	Don't know	11-29 Years	Yes	No	Don't know	Two	Don't know	Don't know	high cost, Worry about complications, Worry about efficacy of vaccine, Inadequate information	Medical school teachings, Internet
2019-12-27 13:39:45	Disagree
2019-12-27 13:41:49	Agree	Yes	Hashemite University	Male	24	4th years	More than 2000	Urban	Jordanian	No	Amman	Yes	Infection	Multiple sexual partners, Infection with HPV, Poor hygiene, Family history of the disease	Bleeding per vagina, Discharge per vagina, Weight loss, Post coital bleeding (spotting or bleeding unrelated to menstruation that occurs during or after sexual intercourse)	4 Years	3Years	Don't know	Yes	Don't know	Yes	Sexual	Pap smear, Biopsy	Genital warts	Cervical carcinoma	Yes	30-50 Years	Yes	Don't know	No	One	0.7	Yes	Worry about efficacy of vaccine	Social media
2019-12-27 13:50:10	Agree	Yes	Hashemite University	Male	20	4th years	1001 - 1499	Urban	Jordanian	No	Amman	Yes	Infection	Infection with HPV, Poor hygiene, Smoking, Family history of the disease	Bleeding per vagina, Discharge per vagina, Menstrual problems, Itching, Weight loss, Anemia	5 Years	2 Years	No	Don't know	Yes	Yes	Sexual	Blood test, PCR (Polymerase chain reaction)	Genital warts	Cervical carcinoma	Don't know	30-50 Years	Yes	Yes	No	Don't know	0.7	Yes	high cost, Worry about complications	Medical school teachings
2019-12-27 13:58:20	Agree	Yes	Hashemite University	Male	22	4th years	1500 - 2000	Urban	Jordanian	No	Azarqa	No	Infection	Multiple sexual partners, Infection with HPV, Poor hygiene, Family history of the disease	Lower abdominal pain, Bleeding per vagina, Menstrual problems, Itching, Weight loss, Post coital bleeding (spotting or bleeding unrelated to menstruation that occurs during or after sexual intercourse)	Don't know	Don't know	No	Yes	Yes	Yes	Sexual	Pap smear, PCR (Polymerase chain reaction)	Genital warts	Cervical carcinoma	Yes	11-29 Years	Yes	No	Yes	Two	1	Yes	Inadequate information	Medical school teachings, Books, Internet
2019-12-27 14:00:23	Agree	Yes	Hashemite University	Female	22.5	4th years	More than 2000	Urban	Non-Jordanian	No		No	Infection	Multiple sexual partners, Infection with HPV, Poor hygiene, Smoking	Bleeding per vagina, Fever, Discharge per vagina, Itching, Weight loss, Post coital bleeding (spotting or bleeding unrelated to menstruation that occurs during or after sexual intercourse)	Don't know	2 Years	Yes	Yes	Yes	Yes	Sexual	Pap smear	Don't know	Don't know	No	11-29 Years	Yes	No	No	Don't know	0.5	Yes	Worry about efficacy of vaccine, Inadequate information	Medical school teachings
2019-12-27 14:34:28	Agree	Yes	Hashemite University	Female	21	4th years	More than 2000	Urban	Jordanian	No	Amman	No	Infection	Multiple sexual partners, Infection with HPV, Early age of first coitus, Smoking, Family history of the disease, Contraception (Intrauterine device/oral contraceptives), Nulliparity (Never married)	Bleeding per vagina, Discharge per vagina, Weight loss, Post coital bleeding (spotting or bleeding unrelated to menstruation that occurs during or after sexual intercourse), Anemia	3 Years	5 Years	No	Yes	Don't know	Yes	Sexual	Pap smear	Genital warts	Cervical carcinoma	Don't know	11-29 Years	Yes	Yes	No	Two	0.9	Yes	high cost, Worry about efficacy of vaccine	Medical school teachings, Internet
2019-12-27 15:09:56	Agree	Yes	Hashemite University	Male	22	4th years	Less than 500	Urban	Jordanian	No	Azarqa	Yes	Environmental	Multiple sexual partners, Infection with HPV, Poor hygiene, Family history of the disease	Lower abdominal pain, Bleeding per vagina, Discharge per vagina, Menstrual problems, Weight loss, Swelling of cervix, Anemia	5 Years	2 Years	No	Don't know	Yes	Yes	Sexual	Blood test, PCR (Polymerase chain reaction)	Genital warts	Cervical carcinoma	Don't know	11-29 Years	Don't know	Yes	Don't know	Don't know	Don't know	Yes	Worry about complications	Internet
2019-12-27 15:22:49	Agree	Yes	Hashemite University	Female	22	4th years	More than 2000	Urban	Jordanian	No	Amman	No	Genetic	Infection with HPV, Smoking, Family history of the disease, Old age, Nulliparity (Never married)	Bleeding per vagina, Discharge per vagina, Menstrual problems, Weight loss, Post coital bleeding (spotting or bleeding unrelated to menstruation that occurs during or after sexual intercourse)	Don't know	2 Years	Yes	Yes	Don't know	Yes	Sexual	Pap smear, PCR (Polymerase chain reaction)	Cervical carcinoma	Genital warts	Don't know	11-29 Years	Yes	Yes	Don't know	Don't know	Don't know	No	Worry about efficacy of vaccine, Inadequate information	Medical school teachings
2019-12-27 15:42:14	Agree	Yes	Albalqa University	Male	21	3th years	Less than 500	Rural	Jordanian	No	Salt	No	Environmental	Infection with HPV, Family history of the disease, Contraception (Intrauterine device/oral contraceptives)	Bleeding per vagina, Swelling of cervix, Post coital bleeding (spotting or bleeding unrelated to menstruation that occurs during or after sexual intercourse), Anemia	2 Years	Don't know	No	Yes	Yes	Yes	Blood	Blood test, Pap smear, PCR (Polymerase chain reaction)	Cervical carcinoma	Genital warts	Yes	30-50 Years	No	Yes	Yes	Don't know	0.7	Don't know	high cost, Worry about complications	Medical school teachings
2019-12-27 17:20:45	Agree	Yes	Hashemite University	Male	20	4th years	More than 2000	Urban	Jordanian	No	Amman	Yes	Environmental	Multiple sexual partners, Infection with HPV, Poor hygiene, Early age of first coitus, Smoking, Family history of the disease, Old age	No symptoms, Lower abdominal pain, Bleeding per vagina	5 Years	2 Years	No	Yes	Yes	Yes	Sexual	Pap smear	Genital warts	Cervical carcinoma	Yes	11-29 Years	Yes	Yes	Yes	Don't know	Don't know	No	high cost	Medical school teachings
2019-12-27 18:40:09	Agree	Yes	Yarmouk University	Male	22	4th years	501- 1000	Urban	Jordanian	Yes	Almafrq	Yes	Infection	Multiple sexual partners, Infection with HPV, Poor hygiene, Early age of first coitus, Smoking, Family history of the disease, Old age, Contraception (Intrauterine device/oral contraceptives), Nulliparity (Never married)	Lower abdominal pain, Bleeding per vagina, Discharge per vagina, Menstrual problems, Itching, Post coital bleeding (spotting or bleeding unrelated to menstruation that occurs during or after sexual intercourse), Anemia	4 Years	2 Years	Don't know	Yes	Don't know	Don't know	Environmental	Blood test, Pap smear, Biopsy	Cervical carcinoma	Plantar warts	Yes	51 and above Years	No	No	No	Three	0.9	No	high cost	Friends
2019-12-27 18:44:01	Agree	Yes	Hashemite University	Female	23	6th years	1001 - 1499	Urban	Jordanian	No	Amman	Yes	Infection	Multiple sexual partners, Infection with HPV, Poor hygiene, Early age of first coitus, Smoking	Bleeding per vagina, Discharge per vagina, Post coital bleeding (spotting or bleeding unrelated to menstruation that occurs during or after sexual intercourse)	3 Years	2 Years	No	Yes	Yes	Yes	Don't know	Blood test, Pap smear, PCR (Polymerase chain reaction)	Genital warts	Cervical carcinoma	No	30-50 Years	Don't know	No	Yes	Four	0.7	No	high cost	Medical school teachings
2019-12-27 18:44:01	Agree	Yes	Hashemite University	Female	23	6th years	1001 - 1499	Urban	Jordanian	Yes	Azarqa	Yes	Infection	Multiple sexual partners, Infection with HPV, Early age of first coitus, Smoking, Family history of the disease, Old age	Bleeding per vagina, Itching, Post coital bleeding (spotting or bleeding unrelated to menstruation that occurs during or after sexual intercourse)	3 Years	3Years	Don't know	Don't know	No	Yes	Sexual	Blood test, Pap smear, Biopsy	Genital warts	Cervical carcinoma	Don't know	51 and above Years	Yes	Yes	Don't know	Don't know	Don't know	No	Worry about efficacy of vaccine, Inadequate information	Medical school teachings, Books, Social media
2019-12-27 18:46:29	Agree	Yes	Hashemite University	Female	23	6th years	501- 1000	Urban	Jordanian	No	Amman	No	Infection	Multiple sexual partners, Infection with HPV, Poor hygiene, Family history of the disease	No symptoms, Bleeding per vagina, Discharge per vagina, Weight loss, Swelling of cervix, Post coital bleeding (spotting or bleeding unrelated to menstruation that occurs during or after sexual intercourse)	3 Years	Don't know	No	Yes	Yes	Yes	Sexual	Pap smear, PCR (Polymerase chain reaction), Biopsy	Don't know	Cervical carcinoma	No	11-29 Years	Yes	Yes	Don't know	Don't know	Don't know	Yes	high cost, Inadequate information	Medical school teachings
2019-12-27 18:47:15	Agree	Yes	Hashemite University	Female	23	6th years	501- 1000	Urban	Jordanian	No	Amman	Yes	Infection	Multiple sexual partners, Infection with HPV, Poor hygiene, Smoking, Family history of the disease	No symptoms, Lower abdominal pain, Bleeding per vagina, Fever, Discharge per vagina, Menstrual problems, Itching, Weight loss, Swelling of cervix, Post coital bleeding (spotting or bleeding unrelated to menstruation that occurs during or after sexual intercourse)	3 Years	5 Years	Yes	Yes	Yes	Yes	Sexual	Pap smear, PCR (Polymerase chain reaction), Biopsy	Cervical carcinoma	Genital warts	Yes	11-29 Years	Don't know	Yes	Don't know	Don't know	0.9	No	high cost, Worry about complications, Worry about efficacy of vaccine, Inadequate information	Medical school teachings
2019-12-27 18:47:56	Agree	Yes	Hashemite University	Female	25	6th years	501- 1000	Urban	Jordanian	No	Almafrq	No	Infection	Multiple sexual partners, Infection with HPV, Early age of first coitus	No symptoms, Bleeding per vagina, Discharge per vagina, Weight loss, Swelling of cervix, Post coital bleeding (spotting or bleeding unrelated to menstruation that occurs during or after sexual intercourse), Anemia	3 Years	5 Years	Don't know	Yes	Don't know	Yes	Sexual	PCR (Polymerase chain reaction)	Don't know	Cervical carcinoma	Yes	11-29 Years	Don't know	Don't know	No	Don't know	Don't know	Yes	Inadequate information	Medical school teachings, Internet
2019-12-27 18:49:51	Agree	Yes	Hashemite University	Female	23	6th years	1500 - 2000	Urban	Jordanian	No	Amman	Yes	Infection	Multiple sexual partners, Infection with HPV, Smoking, Family history of the disease, Contraception (Intrauterine device/oral contraceptives)	No symptoms, Lower abdominal pain, Post coital bleeding (spotting or bleeding unrelated to menstruation that occurs during or after sexual intercourse)	3 Years	5 Years	No	Yes	Yes	Yes	Sexual	PCR (Polymerase chain reaction)	Genital warts	Cervical carcinoma	No	11-29 Years	Don't know	Yes	Don't know	Two	0.7	No	Inadequate information	Medical school teachings, Internet
2019-12-27 18:58:14	Agree	Yes	Hashemite University	Female	22	6th years	1001 - 1499	Urban	Jordanian	No	Azarqa	Yes	Infection	Infection with HPV	Bleeding per vagina	Don't know	Don't know	No	Yes	Yes	Yes	Sexual	Pap smear	Plantar warts	Cervical carcinoma	No	0-10 Years	Don't know	Don't know	Don't know	Don't know	0.7	Yes	Worry about efficacy of vaccine	Medical school teachings
2019-12-27 18:59:47	Agree	Yes	Hashemite University	Female	23	6th years	501- 1000	Rural	Jordanian	No	Salt	Yes	Infection	Multiple sexual partners, Infection with HPV, Early age of first coitus, Smoking, Family history of the disease, Contraception (Intrauterine device/oral contraceptives)	No symptoms, Lower abdominal pain, Bleeding per vagina, Discharge per vagina, Post coital bleeding (spotting or bleeding unrelated to menstruation that occurs during or after sexual intercourse), Anemia	3 Years	3Years	No	Yes	Yes	Yes	Sexual	Pap smear	Plantar warts	Cervical carcinoma	Don't know	11-29 Years	Yes	Yes	No	Two	0.9	Don't know	Worry about complications, Inadequate information	Medical school teachings, Books, Internet
2019-12-27 19:05:55	Agree	Yes	Hashemite University	Female	23	6th years	1001 - 1499	Urban	Jordanian	No	Amman	No	Infection	Multiple sexual partners, Infection with HPV, Poor hygiene, Early age of first coitus, Family history of the disease	No symptoms, Bleeding per vagina, Fever, Discharge per vagina, Itching, Weight loss, Swelling of cervix, Post coital bleeding (spotting or bleeding unrelated to menstruation that occurs during or after sexual intercourse)	3 Years	5 Years	Yes	Yes	No	Yes	Sexual	Pap smear	Cervical carcinoma	Genital warts	Yes	11-29 Years	Yes	Yes	Yes	Three	0.7	Yes	Inadequate information	Medical school teachings, Books, Internet
2019-12-27 19:07:40	Agree	Yes	Hashemite University	Female	23	6th years	1001 - 1499	Urban	Jordanian	No	Amman	No	Infection	Multiple sexual partners, Infection with HPV, Early age of first coitus, Family history of the disease, Nulliparity (Never married)	Lower abdominal pain, Bleeding per vagina, Discharge per vagina, Itching, Weight loss, Post coital bleeding (spotting or bleeding unrelated to menstruation that occurs during or after sexual intercourse)	2 Years	2 Years	No	Yes	Yes	Yes	Sexual	Pap smear, PCR (Polymerase chain reaction)	Genital warts	Cervical carcinoma	Don't know	11-29 Years	Don't know	Don't know	Don't know	Don't know	0.7	No	Inadequate information	Medical school teachings, Books, Internet
2019-12-27 19:08:54	Agree	Yes	Hashemite University	Female	23	6th years	501- 1000	Urban	Jordanian	No	Amman	Yes	Infection	Multiple sexual partners, Infection with HPV, Poor hygiene, Early age of first coitus, Smoking, Family history of the disease, Old age, Contraception (Intrauterine device/oral contraceptives)	No symptoms, Lower abdominal pain, Bleeding per vagina, Fever, Discharge per vagina, Weight loss, Swelling of cervix, Post coital bleeding (spotting or bleeding unrelated to menstruation that occurs during or after sexual intercourse)	3 Years	3Years	No	Yes	Yes	Yes	Sexual	PCR (Polymerase chain reaction), Biopsy	Genital warts	Cervical carcinoma	Yes	11-29 Years	Yes	Yes	Yes	Three	1	No	Inadequate information	Medical school teachings
2019-12-27 19:19:26	Agree	Yes	Hashemite University	Female	23	6th years	501- 1000	Rural	Jordanian	No	Jarash	Yes	Infection	Multiple sexual partners, Infection with HPV, Early age of first coitus, Smoking, Family history of the disease	Discharge per vagina, Weight loss, Post coital bleeding (spotting or bleeding unrelated to menstruation that occurs during or after sexual intercourse)	3 Years	3Years	No	Yes	Yes	Yes	Sexual	Pap smear, Biopsy	Genital warts	Cervical carcinoma	Yes	11-29 Years	Yes	Yes	Yes	Two	0.9	Yes	Worry about complications, Worry about efficacy of vaccine	Medical school teachings, Books
2019-12-27 19:30:16	Agree	Yes	Hashemite University	Female	23	6th years	1500 - 2000	Urban	Jordanian	No	Amman	Yes	Infection	Multiple sexual partners, Infection with HPV, Poor hygiene, Smoking, Family history of the disease, Contraception (Intrauterine device/oral contraceptives)	No symptoms, Bleeding per vagina, Discharge per vagina, Weight loss, Post coital bleeding (spotting or bleeding unrelated to menstruation that occurs during or after sexual intercourse), Anemia	2 Years	5 Years	No	Yes	Yes	No	Sexual	Pap smear, PCR (Polymerase chain reaction)	Genital warts	Cervical carcinoma	Yes	11-29 Years	Don't know	Yes	Yes	Don't know	Don't know	Yes	Worry about complications	Medical school teachings
2019-12-27 19:30:51	Agree	Yes	Hashemite University	Female	21	4th years	Less than 500	Urban	Jordanian	No	Irbid	Yes	Infection	Poor hygiene	Bleeding per vagina	5 Years	4 Years	No	No	Yes	Yes	Don't know	Don't know	Don't know	Don't know	Yes	0-10 Years	Yes	No	No	One	0.7	Don't know	Inadequate information	Television
2019-12-27 19:43:41	Agree	Yes	Hashemite University	Female	23	6th years	1500 - 2000	Rural	Jordanian	No	Amman	No	Infection	Multiple sexual partners, Infection with HPV, Poor hygiene, Contraception (Intrauterine device/oral contraceptives)	No symptoms, Lower abdominal pain, Bleeding per vagina, Fever, Discharge per vagina, Menstrual problems, Weight loss, Post coital bleeding (spotting or bleeding unrelated to menstruation that occurs during or after sexual intercourse), Anemia	3 Years	Don't know	No	Yes	Yes	Yes	Sexual	Pap smear, PCR (Polymerase chain reaction)	Genital warts	Cervical carcinoma	Yes	11-29 Years	Yes	No	Yes	Two	0.7	Yes	high cost, Worry about complications, Worry about efficacy of vaccine, Inadequate information	Medical school teachings
2019-12-27 19:43:43	Agree	Yes	Mutah University	Female	23	5th years	1001 - 1499	Urban	Jordanian	No	Aqaba	Yes	Infection	Multiple sexual partners, Infection with HPV, Family history of the disease, Contraception (Intrauterine device/oral contraceptives), Nulliparity (Never married)	Lower abdominal pain, Bleeding per vagina, Discharge per vagina, Menstrual problems, Post coital bleeding (spotting or bleeding unrelated to menstruation that occurs during or after sexual intercourse)	5 Years	3Years	Don't know	No	Don't know	Yes	Sexual	Don't know	Don't know	Don't know	Don't know	30-50 Years	Don't know	Don't know	Don't know	Don't know	Don't know	Don't know	high cost, Worry about complications, Worry about efficacy of vaccine, Inadequate information	Medical school teachings
2019-12-27 19:58:31	Agree	Yes	Hashemite University	Female	23	6th years	501- 1000	Urban	Jordanian	No	Amman	No	Infection	Multiple sexual partners, Infection with HPV, Early age of first coitus, Smoking	No symptoms, Lower abdominal pain, Bleeding per vagina, Discharge per vagina, Itching, Weight loss, Swelling of cervix, Post coital bleeding (spotting or bleeding unrelated to menstruation that occurs during or after sexual intercourse)	3 Years	5 Years	No	Yes	Don't know	Yes	Sexual	Pap smear, Biopsy	Genital warts	Cervical carcinoma	Yes	11-29 Years	Yes	No	Yes	Two	0.9	Yes	high cost	Books, Internet
2019-12-27 20:03:33	Agree	Yes	Hashemite University	Female	23	6th years	1001 - 1499	Rural	Jordanian	No	Amman	Yes	Infection	Multiple sexual partners, Infection with HPV, Poor hygiene	No symptoms, Lower abdominal pain, Weight loss, Post coital bleeding (spotting or bleeding unrelated to menstruation that occurs during or after sexual intercourse)	3 Years	5 Years	No	No	Yes	Yes	Sexual	PCR (Polymerase chain reaction)	Genital warts	Cervical carcinoma	Yes	11-29 Years	Don't know	No	Yes	Three	0.7	Yes	Inadequate information	Medical school teachings
2019-12-27 20:10:44	Agree	Yes	Hashemite University	Female	24	6th years	Less than 500	Urban	Jordanian	No	Amman	Yes	Infection	Multiple sexual partners, Infection with HPV, Poor hygiene, Early age of first coitus, Family history of the disease	No symptoms, Bleeding per vagina, Menstrual problems, Anemia	3 Years	5 Years	No	Yes	Yes	Yes	Sexual	Pap smear	Cervical carcinoma	Genital warts	No	11-29 Years	Don't know	Don't know	Don't know	One	0.9	Yes	high cost, Worry about complications, Inadequate information	Books
2019-12-27 20:23:39	Agree	Yes	Hashemite University	Female	22	6th years	1500 - 2000	Urban	Jordanian	No	Irbid	Yes	Infection	Multiple sexual partners, Infection with HPV, Poor hygiene, Early age of first coitus, Contraception (Intrauterine device/oral contraceptives)	No symptoms, Lower abdominal pain, Bleeding per vagina, Fever, Discharge per vagina, Post coital bleeding (spotting or bleeding unrelated to menstruation that occurs during or after sexual intercourse), Anemia	Don't know	5 Years	No	Don't know	No	Yes	Sexual	Pap smear, Biopsy	Cervical carcinoma	Genital warts	Yes	11-29 Years	Yes	No	Don't know	Three	0.9	Yes	Worry about complications, Inadequate information	Medical school teachings, Books, Internet
2019-12-27 20:23:51	Agree	Yes	Hashemite University	Female	23	6th years	1001 - 1499	Urban	Jordanian	Yes	Amman	No	Infection	Multiple sexual partners, Infection with HPV, Poor hygiene, Early age of first coitus, Smoking, Family history of the disease, Contraception (Intrauterine device/oral contraceptives)	No symptoms, Lower abdominal pain, Bleeding per vagina, Discharge per vagina, Menstrual problems, Weight loss, Post coital bleeding (spotting or bleeding unrelated to menstruation that occurs during or after sexual intercourse), Anemia	3 Years	5 Years	No	Yes	Yes	Yes	Sexual	Pap smear, PCR (Polymerase chain reaction), Biopsy	Genital warts	Cervical carcinoma	Yes	11-29 Years	Yes	No	No	Three	0.7	Don't know	high cost, Worry about complications, Worry about efficacy of vaccine, Inadequate information	Medical school teachings, Books, Internet
2019-12-27 20:23:59	Agree	Yes	Hashemite University	Female	23	6th years	1500 - 2000	Urban	Jordanian	No	Amman	No	Infection	Multiple sexual partners, Infection with HPV, Poor hygiene, Early age of first coitus, Contraception (Intrauterine device/oral contraceptives)	Lower abdominal pain, Bleeding per vagina, Discharge per vagina, Post coital bleeding (spotting or bleeding unrelated to menstruation that occurs during or after sexual intercourse)	3 Years	2 Years	Yes	Yes	Yes	Yes	Sexual	Pap smear, Biopsy	Plantar warts	Cervical carcinoma	Yes	0-10 Years	No	Yes	No	Three	0.7	No	Worry about complications, Worry about efficacy of vaccine, Inadequate information	Medical school teachings
2019-12-27 20:42:50	Agree	Yes	Hashemite University	Female	21	4th years	501- 1000	Urban	Jordanian	No	Azarqa	Yes	Infection	Multiple sexual partners, Infection with HPV, Poor hygiene, Smoking, Family history of the disease, Old age, Contraception (Intrauterine device/oral contraceptives)	Lower abdominal pain, Bleeding per vagina, Discharge per vagina, Menstrual problems, Itching, Weight loss, Swelling of cervix, Anemia	4 Years	2 Years	Don't know	Yes	Yes	Yes	Blood	Blood test, Pap smear, Biopsy	Cervical carcinoma	Cervical carcinoma	Don't know	11-29 Years	Don't know	Yes	Yes	Don't know	0.7	Yes	high cost, Worry about complications	Medical school teachings
2019-12-27 20:45:49	Agree	Yes	Hashemite University	Female	23	6th years	1500 - 2000	Urban	Jordanian	No	Irbid	No	Infection	Infection with HPV	Itching	Don't know	Don't know	Don't know	Don't know	Yes	Yes	Don't know	Pap smear	Genital warts	Cervical carcinoma	Don't know	51 and above Years	Don't know	Don't know	Don't know	Don't know	Don't know	Don't know	Inadequate information	Medical school teachings
2019-12-27 21:17:05	Agree	Yes	Jordan University of Science and Technology	Male	23	6th years	1001 - 1499	Urban	Jordanian	No	Irbid	Yes	Infection	Multiple sexual partners, Infection with HPV, Early age of first coitus, Smoking, Family history of the disease, Nulliparity (Never married)	No symptoms, Bleeding per vagina, Post coital bleeding (spotting or bleeding unrelated to menstruation that occurs during or after sexual intercourse)	5 Years	2 Years	Yes	Yes	Don't know	Yes	Sexual	Pap smear, PCR (Polymerase chain reaction), Biopsy	Plantar warts	Cervical carcinoma	Don't know	11-29 Years	Yes	No	Don't know	Don't know	1	Yes	high cost, Worry about efficacy of vaccine, Inadequate information	Medical school teachings, Books, Internet
2019-12-27 21:24:42	Agree	Yes	University of Jordan	Female	20	3th years	501- 1000	Urban	Jordanian	No	Amman	No	Genetic	Smoking, Family history of the disease, Old age	Lower abdominal pain, Bleeding per vagina, Menstrual problems, Swelling of cervix, Post coital bleeding (spotting or bleeding unrelated to menstruation that occurs during or after sexual intercourse)	Don't know	Don't know	Don't know	Don't know	Don't know	Don't know	Sexual	Pap smear	Don't know	Don't know	Don't know	11-29 Years	Don't know	Don't know	No	Don't know	Don't know	Don't know	high cost, Worry about complications, Inadequate information	Medical school teachings
2019-12-27 21:26:59	Agree	Yes	Jordan University of Science and Technology	Male	22	6th years	1001 - 1499	Rural	Jordanian	No	Irbid	No	Infection	Multiple sexual partners, Infection with HPV, Early age of first coitus, Smoking	No symptoms, Lower abdominal pain, Bleeding per vagina, Discharge per vagina, Menstrual problems, Weight loss, Swelling of cervix, Post coital bleeding (spotting or bleeding unrelated to menstruation that occurs during or after sexual intercourse)	3 Years	5 Years	No	Yes	Yes	Yes	Sexual	Pap smear, PCR (Polymerase chain reaction), Biopsy	Genital warts	Cervical carcinoma	Don't know	11-29 Years	Don't know	No	Yes	Three	0.9	No	Inadequate information	Medical school teachings
2019-12-27 21:28:20	Agree	Yes	Jordan University of Science and Technology	Male	25	6th years	More than 2000	Urban	Non-Jordanian	No		No	Infection	Multiple sexual partners, Infection with HPV, Poor hygiene, Early age of first coitus, Family history of the disease, Nulliparity (Never married)	Lower abdominal pain, Bleeding per vagina, Discharge per vagina, Menstrual problems, Weight loss, Swelling of cervix, Post coital bleeding (spotting or bleeding unrelated to menstruation that occurs during or after sexual intercourse)	2 Years	2 Years	No	Yes	Yes	Yes	Sexual	Blood test, Pap smear, PCR (Polymerase chain reaction), Biopsy	Genital warts	Cervical carcinoma	Yes	30-50 Years	Yes	Yes	Don't know	One	Don't know	Yes	high cost, Inadequate information	Medical school teachings, Internet
2019-12-27 21:29:05	Agree	Yes	Jordan University of Science and Technology	Male	28	6th years	Less than 500	Urban	Non-Jordanian	No		Yes	Infection	Multiple sexual partners, Infection with HPV, Poor hygiene, Early age of first coitus, Smoking	Bleeding per vagina, Discharge per vagina, Swelling of cervix, Post coital bleeding (spotting or bleeding unrelated to menstruation that occurs during or after sexual intercourse)	3 Years	5 Years	No	Yes	Yes	Yes	Sexual	Pap smear, PCR (Polymerase chain reaction)	Genital warts	Cervical carcinoma	Yes	11-29 Years	Yes	No	Don't know	Three	0.7	No	high cost	Medical school teachings
2019-12-27 21:29:08	Agree	Yes	Jordan University of Science and Technology	Male	22	6th years	More than 2000	Urban	Non-Jordanian	No		Yes	Infection	Multiple sexual partners, Infection with HPV, Early age of first coitus, Smoking	Bleeding per vagina, Discharge per vagina, Post coital bleeding (spotting or bleeding unrelated to menstruation that occurs during or after sexual intercourse), Anemia	2 Years	5 Years	No	Yes	Yes	Yes	Sexual	PCR (Polymerase chain reaction)	Genital warts	Cervical carcinoma	Yes	30-50 Years	Don't know	Yes	Don't know	Two	0.9	No	high cost, Inadequate information	Medical school teachings
2019-12-27 21:29:20	Agree	Yes	Jordan University of Science and Technology	Male	23	5th years	More than 2000	Urban	Jordanian	No	Amman	Yes	Infection	Multiple sexual partners, Infection with HPV	Discharge per vagina, Menstrual problems, Itching, Swelling of cervix, Post coital bleeding (spotting or bleeding unrelated to menstruation that occurs during or after sexual intercourse), Anemia	3 Years	5 Years	No	Yes	Yes	Yes	Sexual	Pap smear, Biopsy	Genital warts	Cervical carcinoma	No	11-29 Years	Yes	Yes	No	One	0.7	Yes	high cost, Worry about complications, Inadequate information	Friends, Social media
2019-12-27 21:31:46	Agree	Yes	Jordan University of Science and Technology	Male	23	6th years	More than 2000	Urban	Jordanian	No	Amman	No	Infection	Multiple sexual partners, Infection with HPV, Poor hygiene, Family history of the disease	Discharge per vagina, Weight loss, Swelling of cervix, Post coital bleeding (spotting or bleeding unrelated to menstruation that occurs during or after sexual intercourse)	2 Years	Don't know	No	Yes	Yes	Yes	Sexual	Pap smear, PCR (Polymerase chain reaction), Biopsy	Genital warts	Cervical carcinoma	Don't know	11-29 Years	Yes	Yes	No	Two	0.9	Yes	high cost	Medical school teachings, Books, Internet
2019-12-27 21:48:34	Agree	Yes	Jordan University of Science and Technology	Male	23	6th years	1001 - 1499	Urban	Jordanian	Yes	Irbid	Yes	Infection	Multiple sexual partners, Infection with HPV, Early age of first coitus, Smoking, Family history of the disease, Old age	No symptoms, Lower abdominal pain, Bleeding per vagina, Discharge per vagina, Weight loss, Swelling of cervix, Post coital bleeding (spotting or bleeding unrelated to menstruation that occurs during or after sexual intercourse), Anemia	2 Years	5 Years	No	Yes	Yes	Yes	Sexual	PCR (Polymerase chain reaction)	Genital warts	Cervical carcinoma	Yes	11-29 Years	Yes	Yes	Yes	One	0.9	Don't know	Inadequate information	Medical school teachings, Friends, Internet
2019-12-27 21:49:50	Agree	Yes	Jordan University of Science and Technology	Male	24	6th years	More than 2000	Rural	Non-Jordanian	No		No	Infection	Multiple sexual partners, Infection with HPV, Early age of first coitus, Smoking	No symptoms, Lower abdominal pain, Bleeding per vagina, Menstrual problems, Weight loss, Post coital bleeding (spotting or bleeding unrelated to menstruation that occurs during or after sexual intercourse)	3 Years	5 Years	No	Yes	Yes	Yes	Sexual	Blood test, Pap smear	Genital warts	Cervical carcinoma	Don't know	11-29 Years	Yes	No	Yes	Two	0.7	Yes	high cost	Medical school teachings
2019-12-27 21:57:21	Agree	Yes	Mutah University	Male	25	6th years	501- 1000	Rural	Jordanian	No	Irbid	Yes	Environmental	Infection with HPV, Poor hygiene, Smoking, Family history of the disease, Old age	Bleeding per vagina, Discharge per vagina, Menstrual problems, Weight loss, Swelling of cervix, Post coital bleeding (spotting or bleeding unrelated to menstruation that occurs during or after sexual intercourse)	Don't know	Don't know	Don't know	Don't know	Yes	Yes	Sexual	Blood test, Pap smear, Biopsy	Cervical carcinoma	Genital warts	Yes	11-29 Years	Yes	No	No	Don't know	0.5	Yes	high cost	Medical school teachings
2019-12-27 22:03:37	Agree	Yes	Hashemite University	Female	23	6th years	1001 - 1499	Urban	Jordanian	No	Amman	No	Infection	Multiple sexual partners, Infection with HPV, Poor hygiene, Early age of first coitus, Smoking	No symptoms, Lower abdominal pain, Bleeding per vagina, Discharge per vagina, Post coital bleeding (spotting or bleeding unrelated to menstruation that occurs during or after sexual intercourse)	3 Years	5 Years	No	No	Yes	Yes	Sexual	Pap smear, Biopsy	Genital warts	Cervical carcinoma	Yes	11-29 Years	Yes	Don't know	Don't know	Three	Don't know	Yes	high cost, Inadequate information	Medical school teachings, Books
2019-12-27 22:07:41	Agree	Yes	Hashemite University	Female	22	5th years	1500 - 2000	Urban	Jordanian	No	Amman	Yes	Infection	Multiple sexual partners, Infection with HPV, Poor hygiene, Early age of first coitus, Smoking, Family history of the disease, Old age, Contraception (Intrauterine device/oral contraceptives), Nulliparity (Never married)	No symptoms, Lower abdominal pain, Bleeding per vagina, Discharge per vagina, Weight loss, Swelling of cervix, Post coital bleeding (spotting or bleeding unrelated to menstruation that occurs during or after sexual intercourse)	3 Years	2 Years	Don't know	Yes	Don't know	Yes	Sexual	Don't know	Cervical carcinoma	Cervical carcinoma	Don't know	11-29 Years	Don't know	Yes	Yes	Don't know	0.9	Yes	Inadequate information	Medical school teachings
2019-12-27 22:12:59	Agree	Yes	Jordan University of Science and Technology	Male	23	6th years	More than 2000	Urban	Non-Jordanian	No		No	Infection	Multiple sexual partners, Infection with HPV, Poor hygiene, Early age of first coitus	Discharge per vagina, Itching	3 Years	Don't know	Don't know	Don't know	Don't know	Yes	Sexual	Pap smear	Genital warts	Cervical carcinoma	Don't know	11-29 Years	Yes	Yes	No	Don't know	Don't know	Yes	Inadequate information	Medical school teachings
2019-12-27 22:15:27	Agree	Yes	Mutah University	Male	23	6th years	More than 2000	Urban	Jordanian	No	Amman	No	Infection	Multiple sexual partners, Infection with HPV, Early age of first coitus, Smoking	Post coital bleeding (spotting or bleeding unrelated to menstruation that occurs during or after sexual intercourse)	5 Years	5 Years	No	Yes	Yes	Yes	Sexual	Pap smear	Genital warts	Cervical carcinoma	Don't know	11-29 Years	Yes	No	Yes	One	0.9	Yes	high cost	Medical school teachings, Friends
2019-12-27 22:16:41	Agree	Yes	Mutah University	Female	24	6th years	More than 2000	Rural	Jordanian	No	Ma'an	Yes	Infection	Multiple sexual partners, Infection with HPV, Early age of first coitus, Family history of the disease	No symptoms, Lower abdominal pain, Bleeding per vagina, Discharge per vagina, Weight loss, Post coital bleeding (spotting or bleeding unrelated to menstruation that occurs during or after sexual intercourse)	2 Years	5 Years	No	Yes	Yes	Yes	Sexual	Pap smear, Biopsy	Genital warts	Cervical carcinoma	Don't know	11-29 Years	Don't know	Yes	No	Don't know	Don't know	Yes	Inadequate information	Medical school teachings, Books
2019-12-27 22:24:26	Agree	Yes	Albalqa University	Male	20	3th years	1500 - 2000	Rural	Jordanian	No	Amman	No	Genetic	Infection with HPV, Family history of the disease, Old age, Contraception (Intrauterine device/oral contraceptives)	Bleeding per vagina, Discharge per vagina, Menstrual problems, Anemia	Don't know	Don't know	No	Don't know	Yes	Yes	Blood	Blood test	Don't know	Don't know	No	0-10 Years	Yes	Yes	No	Don't know	0.5	Yes	high cost	Medical school teachings
2019-12-27 22:25:50	Agree	Yes	Mutah University	Female	23	6th years	1001 - 1499	Rural	Jordanian	No	Irbid	No	Infection	Multiple sexual partners, Infection with HPV, Poor hygiene, Early age of first coitus, Family history of the disease, Old age, Contraception (Intrauterine device/oral contraceptives)	Lower abdominal pain, Bleeding per vagina, Discharge per vagina, Itching, Weight loss, Post coital bleeding (spotting or bleeding unrelated to menstruation that occurs during or after sexual intercourse)	Don't know	2 Years	Yes	Yes	Yes	Yes	Sexual	Pap smear, Biopsy	Genital warts	Cervical carcinoma	Yes	11-29 Years	Don't know	Yes	Yes	Don't know	Don't know	Yes	high cost, Worry about efficacy of vaccine	Medical school teachings
2019-12-27 22:26:30	Agree	Yes	Mutah University	Female	24	6th years	501- 1000	Rural	Jordanian	No	Ma'an	Yes	Infection	Multiple sexual partners, Infection with HPV, Smoking, Family history of the disease, Nulliparity (Never married)	Bleeding per vagina, Weight loss, Post coital bleeding (spotting or bleeding unrelated to menstruation that occurs during or after sexual intercourse), Anemia	5 Years	3Years	Don't know	Yes	Yes	Yes	Sexual	Pap smear, Biopsy	Plantar warts	Genital warts	Yes	11-29 Years	Don't know	No	No	Three	Don't know	Yes	high cost, Inadequate information	Medical school teachings
2019-12-27 22:28:11	Agree	Yes	Mutah University	Female	23	6th years	1001 - 1499	Urban	Jordanian	No	Alkarak	No	Infection	Multiple sexual partners, Infection with HPV, Early age of first coitus, Smoking	Discharge per vagina, Post coital bleeding (spotting or bleeding unrelated to menstruation that occurs during or after sexual intercourse)	3 Years	5 Years	Don't know	Yes	Yes	Yes	Sexual	PCR (Polymerase chain reaction)	Genital warts	Cervical carcinoma	Yes	11-29 Years	No	Yes	No	One	0.5	Yes	Worry about efficacy of vaccine	Medical school teachings
2019-12-27 22:30:04	Agree	Yes	Mutah University	Male	23	6th years	501- 1000	Rural	Jordanian	No	Alkarak	No	Infection	Multiple sexual partners, Infection with HPV, Early age of first coitus, Smoking, Family history of the disease	No symptoms, Bleeding per vagina, Weight loss, Post coital bleeding (spotting or bleeding unrelated to menstruation that occurs during or after sexual intercourse), Anemia	3 Years	5 Years	No	Yes	Yes	Yes	Sexual	Blood test, Pap smear, PCR (Polymerase chain reaction)	Plantar warts	Cervical carcinoma	Yes	11-29 Years	Yes	Yes	No	Don't know	Don't know	Yes	high cost	Medical school teachings
2019-12-27 22:44:50	Agree	Yes	Mutah University	Female	24	6th years	1001 - 1499	Urban	Jordanian	No	Amman	Yes	Infection	Infection with HPV, Family history of the disease, Old age, Nulliparity (Never married)	No symptoms, Bleeding per vagina, Discharge per vagina, Post coital bleeding (spotting or bleeding unrelated to menstruation that occurs during or after sexual intercourse)	3 Years	4 Years	No	Yes	Yes	Yes	Sexual	Pap smear	Genital warts	Cervical carcinoma	Don't know	11-29 Years	No	Yes	Don't know	Don't know	0.9	Yes	Inadequate information	Medical school teachings
2019-12-27 22:45:39	Agree	Yes	Mutah University	Male	23	6th years	1500 - 2000	Rural	Jordanian	No	Alkarak	Yes	Infection	Multiple sexual partners, Infection with HPV, Poor hygiene, Smoking, Family history of the disease, Old age	No symptoms, Lower abdominal pain, Bleeding per vagina, Fever, Discharge per vagina, Menstrual problems, Itching, Weight loss, Swelling of cervix, Anemia	Don't know	Don't know	No	Yes	Yes	Yes	Sexual	Blood test, Pap smear, PCR (Polymerase chain reaction), Biopsy	Genital warts	Cervical carcinoma	Yes	11-29 Years	Yes	Yes	Don't know	Don't know	Don't know	No	Worry about complications, Worry about efficacy of vaccine, Inadequate information	Medical school teachings
2019-12-27 22:48:57	Agree	Yes	Jordan University of Science and Technology	Male	22	6th years	More than 2000	Urban	Jordanian	No	Amman	No	Infection	Multiple sexual partners, Infection with HPV, Early age of first coitus, Old age	No symptoms, Bleeding per vagina, Discharge per vagina, Post coital bleeding (spotting or bleeding unrelated to menstruation that occurs during or after sexual intercourse)	2 Years	3Years	No	Yes	Yes	Yes	Sexual	Pap smear	Genital warts	Cervical carcinoma	Don't know	11-29 Years	Don't know	Yes	Yes	Don't know	Don't know	No	high cost, Inadequate information	Medical school teachings
2019-12-27 22:57:36	Agree	Yes	Mutah University	Male	24	6th years	1500 - 2000	Urban	Jordanian	No	Aqaba	Yes	Infection	Multiple sexual partners, Infection with HPV, Poor hygiene, Early age of first coitus, Family history of the disease	Bleeding per vagina, Discharge per vagina, Menstrual problems, Weight loss, Post coital bleeding (spotting or bleeding unrelated to menstruation that occurs during or after sexual intercourse), Anemia	2 Years	4 Years	Yes	Yes	Yes	Yes	Sexual	Pap smear	Genital warts	Cervical carcinoma	No	11-29 Years	Yes	Yes	Don't know	Two	Don't know	No	high cost, Inadequate information	Internet
2019-12-27 23:00:07	Agree	Yes	Mutah University	Female	23	6th years	1500 - 2000	Urban	Jordanian	No	Alkarak	Yes	Infection	Multiple sexual partners, Infection with HPV, Early age of first coitus, Smoking	Lower abdominal pain, Bleeding per vagina, Discharge per vagina, Menstrual problems, Post coital bleeding (spotting or bleeding unrelated to menstruation that occurs during or after sexual intercourse)	Don't know	2 Years	No	Yes	Yes	Yes	Sexual	Pap smear, Biopsy	Genital warts	Cervical carcinoma	Yes	30-50 Years	Yes	Yes	Yes	Don't know	0.7	No	Worry about efficacy of vaccine	Medical school teachings, Internet
2019-12-27 23:17:57	Agree	Yes	Mutah University	Female	23	6th years	More than 2000	Urban	Jordanian	No	Alkarak	Yes	Genetic	Infection with HPV, Old age, Contraception (Intrauterine device/oral contraceptives), Nulliparity (Never married)	No symptoms, Lower abdominal pain, Bleeding per vagina, Discharge per vagina, Menstrual problems, Weight loss, Post coital bleeding (spotting or bleeding unrelated to menstruation that occurs during or after sexual intercourse), Anemia	5 Years	2 Years	No	Don't know	Yes	Yes	Sexual	Pap smear, PCR (Polymerase chain reaction), Biopsy	Genital warts	Cervical carcinoma	Don't know	51 and above Years	Don't know	Yes	Yes	Don't know	0.7	Yes	high cost, Inadequate information	Medical school teachings
2019-12-27 23:23:59	Agree	Yes	Jordan University of Science and Technology	Female	23	6th years	501- 1000	Urban	Jordanian	No	Amman	No	Infection	Multiple sexual partners, Infection with HPV, Family history of the disease, Old age	Bleeding per vagina, Post coital bleeding (spotting or bleeding unrelated to menstruation that occurs during or after sexual intercourse)	5 Years	Don't know	No	Yes	Don't know	Yes	Sexual	Pap smear	Cervical carcinoma	Genital warts	Don't know	11-29 Years	Yes	Yes	No	Don't know	0.9	No	Worry about complications	Newspapers
2019-12-27 23:54:27	Agree	Yes	Mutah University	Female	23	5th years	501- 1000	Rural	Jordanian	No	Salt	No	Infection	Multiple sexual partners, Infection with HPV, Early age of first coitus, Family history of the disease, Contraception (Intrauterine device/oral contraceptives)	Bleeding per vagina, Discharge per vagina, Weight loss, Post coital bleeding (spotting or bleeding unrelated to menstruation that occurs during or after sexual intercourse), Anemia	3 Years	2 Years	No	Don't know	Don't know	Yes	Sexual	Pap smear, PCR (Polymerase chain reaction), Biopsy	Genital warts	Cervical carcinoma	Don't know	11-29 Years	Yes	Yes	Don't know	Three	Don't know	Yes	high cost, Worry about complications, Inadequate information	Medical school teachings
2019-12-28 00:09:19	Agree	Yes	Jordan University of Science and Technology	Female	23	6th years	Less than 500	Urban	Jordanian	No	Madaba	No	Infection	Multiple sexual partners, Infection with HPV, Early age of first coitus	No symptoms, Bleeding per vagina, Discharge per vagina, Swelling of cervix, Post coital bleeding (spotting or bleeding unrelated to menstruation that occurs during or after sexual intercourse)	3 Years	2 Years	No	Yes	Yes	Yes	Sexual	Pap smear, PCR (Polymerase chain reaction)	Genital warts	Cervical carcinoma	Yes	11-29 Years	Yes	Yes	Don't know	Two	0.7	No	high cost, Inadequate information	Medical school teachings, Books, Internet
2019-12-28 00:34:21	Agree	Yes	Hashemite University	Male	21	4th years	1500 - 2000	Urban	Jordanian	No	Amman	Yes	Infection	Multiple sexual partners, Infection with HPV, Poor hygiene, Early age of first coitus, Family history of the disease	Lower abdominal pain, Bleeding per vagina, Fever, Discharge per vagina, Menstrual problems, Itching, Weight loss, Swelling of cervix, Post coital bleeding (spotting or bleeding unrelated to menstruation that occurs during or after sexual intercourse), Anemia	2 Years	3Years	Don't know	Yes	Don't know	Yes	Sexual	Pap smear	Cervical carcinoma	Genital warts	Yes	11-29 Years	Don't know	Don't know	Yes	Don't know	0.9	Yes	Inadequate information	Medical school teachings
2019-12-28 01:08:01	Agree	Yes	Jordan University of Science and Technology	Female	23	6th years	Less than 500	Rural	Jordanian	No	Irbid	Yes	Infection	Multiple sexual partners, Infection with HPV, Early age of first coitus, Smoking, Family history of the disease, Old age	Lower abdominal pain, Bleeding per vagina, Discharge per vagina, Menstrual problems, Post coital bleeding (spotting or bleeding unrelated to menstruation that occurs during or after sexual intercourse)	3 Years	5 Years	No	Yes	Don't know	Yes	Sexual	Pap smear, PCR (Polymerase chain reaction)	Genital warts	Cervical carcinoma	Don't know	11-29 Years	Don't know	No	Yes	Don't know	0.7	Yes	high cost	Medical school teachings
2019-12-28 01:09:21	Agree	Yes	Jordan University of Science and Technology	Female	25	6th years	1500 - 2000	Urban	Non-Jordanian	No		No	Infection	Multiple sexual partners, Infection with HPV, Poor hygiene, Early age of first coitus	Discharge per vagina, Menstrual problems, Itching, Weight loss, Post coital bleeding (spotting or bleeding unrelated to menstruation that occurs during or after sexual intercourse), Anemia	5 Years	2 Years	No	Yes	Yes	Yes	Sexual	Pap smear	Genital warts	Cervical carcinoma	Yes	11-29 Years	Yes	Yes	No	Don't know	Don't know	Yes	Inadequate information	Medical school teachings, Social media, Internet
2019-12-28 08:28:04	Agree	Yes	Jordan University of Science and Technology	Female	23	6th years	501- 1000	Urban	Jordanian	No	Irbid	No	Infection	Multiple sexual partners, Infection with HPV, Family history of the disease	No symptoms, Bleeding per vagina, Weight loss, Post coital bleeding (spotting or bleeding unrelated to menstruation that occurs during or after sexual intercourse)	Don't know	Don't know	No	Yes	Don't know	Yes	Sexual	Pap smear, PCR (Polymerase chain reaction)	Genital warts	Cervical carcinoma	Don't know	30-50 Years	Don't know	Don't know	Don't know	Don't know	Don't know	Yes	high cost, Worry about efficacy of vaccine	Medical school teachings, Internet
2019-12-28 09:00:10	Agree	Yes	Mutah University	Female	23	6th years	501- 1000	Rural	Jordanian	No	Alkarak	Yes	Infection	Multiple sexual partners, Infection with HPV, Family history of the disease	Lower abdominal pain, Bleeding per vagina, Discharge per vagina, Itching, Swelling of cervix, Post coital bleeding (spotting or bleeding unrelated to menstruation that occurs during or after sexual intercourse)	3 Years	2 Years	No	Yes	Yes	Yes	Sexual	Pap smear	Cervical carcinoma	Genital warts	Don't know	11-29 Years	Yes	Yes	Don't know	Two	Don't know	Yes	high cost, Worry about efficacy of vaccine, Inadequate information	Medical school teachings, Social media, Internet
2019-12-28 09:49:25	Agree	Yes	Jordan University of Science and Technology	Female	23	6th years	More than 2000	Urban	Non-Jordanian	No		No	Infection	Multiple sexual partners, Infection with HPV, Early age of first coitus, Family history of the disease	No symptoms, Bleeding per vagina, Swelling of cervix, Post coital bleeding (spotting or bleeding unrelated to menstruation that occurs during or after sexual intercourse)	2 Years	Don't know	No	Yes	Don't know	Yes	Sexual	Pap smear, PCR (Polymerase chain reaction)	Don't know	Don't know	Don't know	30-50 Years	Yes	Don't know	Don't know	Don't know	Don't know	Yes	Worry about complications, Inadequate information	Medical school teachings
2019-12-28 09:56:14	Agree	Yes	Jordan University of Science and Technology	Female	23	6th years	More than 2000	Urban	Non-Jordanian	No		Yes	Infection	Multiple sexual partners, Infection with HPV, Early age of first coitus, Smoking, Family history of the disease, Nulliparity (Never married)	Bleeding per vagina, Discharge per vagina, Post coital bleeding (spotting or bleeding unrelated to menstruation that occurs during or after sexual intercourse)	3 Years	2 Years	Don't know	Don't know	Yes	Yes	Sexual	Pap smear, PCR (Polymerase chain reaction)	Genital warts	Cervical carcinoma	Don't know	11-29 Years	Don't know	Yes	Don't know	Don't know	Don't know	Yes	high cost, Worry about complications, Worry about efficacy of vaccine	Medical school teachings, Internet
2019-12-28 10:48:15	Agree	Yes	Mutah University	Female	23	6th years	1001 - 1499	Urban	Jordanian	No	Alkarak	Yes	Infection	Multiple sexual partners, Infection with HPV, Poor hygiene, Early age of first coitus, Smoking, Family history of the disease	No symptoms, Bleeding per vagina, Discharge per vagina	2 Years	5 Years	No	Yes	Don't know	Yes	Sexual	PCR (Polymerase chain reaction)	Genital warts	Cervical carcinoma	Yes	11-29 Years	Yes	Don't know	Don't know	Don't know	0.9	Yes	high cost	Medical school teachings, Internet
2019-12-28 11:33:28	Agree	Yes	Yarmouk University	Female	22	5th years	1500 - 2000	Urban	Jordanian	No	Amman	Yes	Infection	Multiple sexual partners, Infection with HPV, Smoking, Family history of the disease	Bleeding per vagina, Discharge per vagina, Menstrual problems, Itching, Weight loss, Swelling of cervix, Post coital bleeding (spotting or bleeding unrelated to menstruation that occurs during or after sexual intercourse), Anemia	5 Years	2 Years	No	Yes	Yes	Yes	Sexual	Pap smear	Genital warts	Cervical carcinoma	Yes	11-29 Years	No	Yes	Don't know	Don't know	Don't know	No	high cost, Worry about complications, Inadequate information	Medical school teachings
2019-12-28 11:58:05	Agree	Yes	Jordan University of Science and Technology	Female	20	3th years	More than 2000	Urban	Jordanian	No	Amman	Yes	Environmental	Multiple sexual partners, Infection with HPV, Early age of first coitus, Smoking, Family history of the disease, Contraception (Intrauterine device/oral contraceptives)	Lower abdominal pain, Bleeding per vagina, Discharge per vagina, Menstrual problems, Swelling of cervix, Post coital bleeding (spotting or bleeding unrelated to menstruation that occurs during or after sexual intercourse), Anemia	4 Years	2 Years	No	Yes	Yes	Yes	Sexual	Blood test, PCR (Polymerase chain reaction), Biopsy	Genital warts	Cervical carcinoma	Yes	11-29 Years	No	Yes	No	Two	0.7	Yes	Worry about complications, Worry about efficacy of vaccine	Medical school teachings, Friends, Social media
2019-12-28 12:00:33	Agree	Yes	Mutah University	Female	24	5th years	501- 1000	Rural	Jordanian	Yes	Irbid	Yes	Infection	Infection with HPV, Smoking, Family history of the disease	Lower abdominal pain, Bleeding per vagina, Weight loss, Anemia	5 Years	3Years	No	Yes	Yes	Yes	Sexual	Pap smear, Biopsy	Cervical carcinoma	Don't know	Yes	30-50 Years	Don't know	Don't know	Don't know	Three	0.9	Don't know	Inadequate information	Medical school teachings
2019-12-28 12:32:30	Agree	Yes	Yarmouk University	Male	22	4th years	More than 2000	Rural	Jordanian	No	Irbid	Yes	Genetic	Infection with HPV, Family history of the disease, Contraception (Intrauterine device/oral contraceptives)	No symptoms, Bleeding per vagina, Weight loss	5 Years	2 Years	No	Yes	Yes	Yes	Blood	Blood test, Biopsy	Genital warts	Cervical carcinoma	Don't know	11-29 Years	Don't know	Don't know	Don't know	Don't know	Don't know	Don't know	high cost, Inadequate information	Books
2019-12-28 12:46:02	Agree	Yes	Mutah University	Female	20	3th years	1001 - 1499	Urban	Jordanian	No	Alkarak	No	Genetic	Infection with HPV, Early age of first coitus, Family history of the disease, Contraception (Intrauterine device/oral contraceptives), Nulliparity (Never married)	Discharge per vagina, Menstrual problems, Swelling of cervix	Don't know	Don't know	No	Yes	Yes	Yes	Don't know	Biopsy	Cervical carcinoma	Genital warts	Don't know	11-29 Years	No	Don't know	Don't know	Don't know	Don't know	Yes	Inadequate information	Social media
2019-12-28 13:20:47	Agree	Yes	Yarmouk University	Female	22	5th years	1500 - 2000	Urban	Jordanian	No	Amman	Yes	Infection	Multiple sexual partners, Infection with HPV, Early age of first coitus, Smoking, Family history of the disease, Old age, Nulliparity (Never married)	Bleeding per vagina, Itching, Weight loss, Post coital bleeding (spotting or bleeding unrelated to menstruation that occurs during or after sexual intercourse), Anemia	5 Years	2 Years	No	No	Yes	Yes	Sexual	Pap smear	Genital warts	Cervical carcinoma	No	11-29 Years	Yes	Don't know	Yes	Three	0.9	Yes	high cost, Worry about complications	Medical school teachings
2019-12-28 13:32:07	Agree	Yes	Mutah University	Male	22	6th years	Less than 500	Urban	Jordanian	No	Amman	No	Infection	Multiple sexual partners, Infection with HPV, Poor hygiene, Early age of first coitus, Smoking	Bleeding per vagina, Discharge per vagina, Menstrual problems, Weight loss, Swelling of cervix, Post coital bleeding (spotting or bleeding unrelated to menstruation that occurs during or after sexual intercourse), Anemia	3 Years	5 Years	No	Yes	Don't know	Yes	Sexual	Blood test, PCR (Polymerase chain reaction), Biopsy	Genital warts	Cervical carcinoma	Don't know	11-29 Years	Yes	Don't know	No	Don't know	Don't know	Yes	high cost, Worry about complications, Worry about efficacy of vaccine, Inadequate information	Medical school teachings, Internet
2019-12-28 14:25:40	Agree	Yes	Jordan University of Science and Technology	Male	23	6th years	1500 - 2000	Urban	Jordanian	No	Irbid	Yes	Infection	Multiple sexual partners, Infection with HPV, Early age of first coitus, Old age	No symptoms, Bleeding per vagina, Menstrual problems, Swelling of cervix, Post coital bleeding (spotting or bleeding unrelated to menstruation that occurs during or after sexual intercourse), Anemia	3 Years	3Years	Yes	Yes	Don't know	Yes	Sexual	Pap smear	Genital warts	Cervical carcinoma	Yes	11-29 Years	Yes	No	Yes	Two	1	No	high cost	Medical school teachings, Books
2019-12-28 14:34:50	Agree	Yes	Jordan University of Science and Technology	Female	23	6th years	1001 - 1499	Urban	Non-Jordanian	No		Yes	Infection	Multiple sexual partners, Infection with HPV, Early age of first coitus	No symptoms, Lower abdominal pain, Bleeding per vagina, Discharge per vagina, Itching, Swelling of cervix, Post coital bleeding (spotting or bleeding unrelated to menstruation that occurs during or after sexual intercourse)	2 Years	3Years	No	Yes	No	Yes	Sexual	Pap smear, PCR (Polymerase chain reaction), Biopsy	Genital warts	Cervical carcinoma	Yes	30-50 Years	Don't know	Yes	Don't know	Don't know	0.9	Don't know	high cost, Inadequate information	Medical school teachings, Internet
2019-12-28 15:20:47	Agree	Yes	Hashemite University	Female	21	4th years	More than 2000	Urban	Jordanian	No	Amman	No	Infection	Multiple sexual partners, Infection with HPV, Early age of first coitus, Smoking, Family history of the disease, Nulliparity (Never married)	No symptoms, Lower abdominal pain, Bleeding per vagina, Discharge per vagina, Menstrual problems, Itching, Weight loss, Swelling of cervix, Post coital bleeding (spotting or bleeding unrelated to menstruation that occurs during or after sexual intercourse), Anemia	3 Years	5 Years	Yes	No	No	Yes	Sexual	Pap smear, Biopsy	Genital warts	Cervical carcinoma	Don't know	11-29 Years	Yes	No	No	One	0.9	Yes	Inadequate information	Medical school teachings, Books
2019-12-28 16:41:41	Agree	Yes	Mutah University	Female	24	6th years	501- 1000	Rural	Jordanian	No	Alkarak	Yes	Infection	Multiple sexual partners, Infection with HPV, Poor hygiene, Early age of first coitus, Family history of the disease	Bleeding per vagina, Menstrual problems, Post coital bleeding (spotting or bleeding unrelated to menstruation that occurs during or after sexual intercourse), Anemia	3 Years	2 Years	No	Don't know	Yes	Yes	Sexual	Pap smear, Biopsy	Cervical carcinoma	Don't know	No	30-50 Years	Don't know	Yes	No	Three	0.5	No	high cost, Worry about complications, Inadequate information	Medical school teachings, Internet
2019-12-28 17:27:03	Agree	Yes	Jordan University of Science and Technology	Female	23	6th years	1500 - 2000	Urban	Non-Jordanian	No		Yes	Infection	Multiple sexual partners, Infection with HPV, Poor hygiene, Early age of first coitus, Smoking, Family history of the disease, Old age, Contraception (Intrauterine device/oral contraceptives), Nulliparity (Never married)	No symptoms, Lower abdominal pain, Bleeding per vagina, Fever, Discharge per vagina, Itching, Weight loss, Swelling of cervix, Post coital bleeding (spotting or bleeding unrelated to menstruation that occurs during or after sexual intercourse), Anemia	3 Years	2 Years	No	Yes	Don't know	Yes	Sexual	Pap smear, Biopsy	Genital warts	Cervical carcinoma	Yes	11-29 Years	No	No	No	Three	0.9	Yes	high cost, Inadequate information	Medical school teachings, Friends, Books, Social media, Internet, Television
2019-12-28 18:10:14	Agree	Yes	Jordan University of Science and Technology	Female	23	6th years	More than 2000	Urban	Non-Jordanian	No		Yes	Genetic	Multiple sexual partners, Infection with HPV, Poor hygiene, Early age of first coitus, Smoking, Family history of the disease	Bleeding per vagina, Discharge per vagina, Post coital bleeding (spotting or bleeding unrelated to menstruation that occurs during or after sexual intercourse), Anemia	2 Years	5 Years	No	Yes	Yes	Yes	Sexual	Pap smear	Genital warts	Cervical carcinoma	Yes	11-29 Years	Yes	Yes	Don't know	Don't know	0.5	Yes	high cost	Internet
2019-12-28 20:18:50	Agree	Yes	Jordan University of Science and Technology	Male	19	3th years	More than 2000	Urban	Jordanian	No	Amman	Yes	Infection	Multiple sexual partners, Infection with HPV, Smoking, Family history of the disease, Old age, Contraception (Intrauterine device/oral contraceptives)	Lower abdominal pain, Bleeding per vagina, Discharge per vagina, Weight loss	3 Years	2 Years	No	Yes	Yes	Yes	Sexual	Don't know	Plantar warts	Cervical carcinoma	Don't know	11-29 Years	Yes	No	Yes	Don't know	Don't know	Yes	Worry about complications	Medical school teachings, Internet
2019-12-28 22:12:06	Agree	Yes	Jordan University of Science and Technology	Male	23	6th years	1500 - 2000	Urban	Jordanian	No	Amman	No	Infection	Multiple sexual partners, Infection with HPV, Early age of first coitus	No symptoms, Bleeding per vagina, Weight loss, Post coital bleeding (spotting or bleeding unrelated to menstruation that occurs during or after sexual intercourse)	Don't know	5 Years	No	Don't know	Yes	Yes	Sexual	Blood test, Pap smear, PCR (Polymerase chain reaction), Biopsy	Genital warts	Cervical carcinoma	Don't know	11-29 Years	Don't know	Don't know	Don't know	Don't know	Don't know	No	Inadequate information	Medical school teachings
2019-12-28 22:16:43	Agree	Yes	University of Jordan	Female	21	4th years	Less than 500	Urban	Jordanian	No	Amman	Yes	Infection	Multiple sexual partners, Infection with HPV, Family history of the disease	Lower abdominal pain	2 Years	2 Years	No	Yes	Yes	Yes	Sexual	Blood test	Cervical carcinoma	Genital warts	Yes	30-50 Years	Don't know	Yes	Yes	Two	0.9	Yes	high cost	Medical school teachings, Newspapers, Friends, Books, Social media, Internet, Television
2019-12-29 06:58:23	Agree	Yes	Hashemite University	Female	23	6th years	1001 - 1499	Rural	Jordanian	No	Azarqa	Yes	Infection	Multiple sexual partners, Infection with HPV, Poor hygiene, Early age of first coitus, Family history of the disease	No symptoms, Bleeding per vagina, Menstrual problems, Post coital bleeding (spotting or bleeding unrelated to menstruation that occurs during or after sexual intercourse)	5 Years	3Years	No	Yes	Yes	Yes	Sexual	PCR (Polymerase chain reaction), Biopsy	Cervical carcinoma	Genital warts	Yes	11-29 Years	Yes	Don't know	Don't know	Don't know	0.9	Don't know	Worry about complications, Worry about efficacy of vaccine	Medical school teachings
2019-12-29 17:21:54	Agree	Yes	Mutah University	Female	23	6th years	More than 2000	Urban	Jordanian	No	Amman	Yes	Infection	Multiple sexual partners, Infection with HPV, Early age of first coitus, Smoking, Family history of the disease	Post coital bleeding (spotting or bleeding unrelated to menstruation that occurs during or after sexual intercourse)	4 Years	2 Years	No	Yes	Yes	Yes	Sexual	Blood test, Pap smear	Genital warts	Cervical carcinoma	Don't know	11-29 Years	Yes	Yes	No	Don't know	Don't know	Don't know	high cost, Inadequate information	Medical school teachings, Books
2019-12-30 02:11:59	Agree	Yes	Jordan University of Science and Technology	Female	23	6th years	1500 - 2000	Urban	Jordanian	No	Irbid	No	Infection	Multiple sexual partners, Infection with HPV, Early age of first coitus, Smoking	No symptoms, Bleeding per vagina, Post coital bleeding (spotting or bleeding unrelated to menstruation that occurs during or after sexual intercourse)	3 Years	5 Years	No	Yes	Yes	Yes	Sexual	Pap smear	Genital warts	Cervical carcinoma	Yes	11-29 Years	Yes	Yes	No	Don't know	0.7	Yes	high cost	Medical school teachings
2019-12-30 08:57:22	Agree	Yes	Jordan University of Science and Technology	Female	28	3th years	501- 1000	Urban	Jordanian	No	Salt	Yes	Genetic	Multiple sexual partners, Infection with HPV, Poor hygiene, Smoking, Family history of the disease, Contraception (Intrauterine device/oral contraceptives), Nulliparity (Never married)	No symptoms, Bleeding per vagina, Discharge per vagina, Menstrual problems, Weight loss, Swelling of cervix, Post coital bleeding (spotting or bleeding unrelated to menstruation that occurs during or after sexual intercourse), Anemia	5 Years	2 Years	No	No	Yes	Yes	Sexual	PCR (Polymerase chain reaction)	Don't know	Don't know	No	11-29 Years	Don't know	Yes	No	Three	0.5	Yes	Inadequate information	Medical school teachings
2019-12-30 17:42:41	Agree	Yes	Jordan University of Science and Technology	Female	22	5th years	1001 - 1499	Rural	Jordanian	No	Irbid	Yes	Infection	Multiple sexual partners, Infection with HPV, Early age of first coitus, Smoking, Contraception (Intrauterine device/oral contraceptives)	Lower abdominal pain, Bleeding per vagina, Menstrual problems, Weight loss, Post coital bleeding (spotting or bleeding unrelated to menstruation that occurs during or after sexual intercourse), Anemia	Don't know	2 Years	Don't know	Yes	Don't know	Yes	Sexual	Pap smear, PCR (Polymerase chain reaction)	Genital warts	Cervical carcinoma	Yes	30-50 Years	Don't know	Yes	Don't know	Don't know	Don't know	Yes	high cost, Inadequate information	Medical school teachings
2019-12-30 17:43:10	Agree	Yes	Jordan University of Science and Technology	Male	22	6th years	More than 2000	Urban	Non-Jordanian	No		No	Infection	Multiple sexual partners, Infection with HPV, Poor hygiene, Early age of first coitus, Old age, Contraception (Intrauterine device/oral contraceptives)	Bleeding per vagina, Discharge per vagina, Menstrual problems, Weight loss, Post coital bleeding (spotting or bleeding unrelated to menstruation that occurs during or after sexual intercourse)	3 Years	2 Years	No	Yes	Yes	Yes	Sexual	Pap smear	Genital warts	Cervical carcinoma	Yes	11-29 Years	Yes	Yes	Don't know	One	0.7	Yes	Worry about complications	Medical school teachings, Books
2019-12-30 17:43:20	Agree	Yes	Jordan University of Science and Technology	Male	18	3th years	1500 - 2000	Rural	Jordanian	No	Irbid	No	Environmental	Multiple sexual partners, Poor hygiene, Smoking, Contraception (Intrauterine device/oral contraceptives)	No symptoms, Lower abdominal pain, Bleeding per vagina, Fever, Discharge per vagina, Menstrual problems, Itching, Weight loss, Swelling of cervix, Post coital bleeding (spotting or bleeding unrelated to menstruation that occurs during or after sexual intercourse), Anemia	Don't know	Don't know	No	Don't know	Yes	Don't know	Don't know	Don't know	Don't know	Don't know	Don't know	11-29 Years	Don't know	Don't know	Don't know	Don't know	Don't know	Don't know	Worry about complications	Medical school teachings, Newspapers, Friends, Books, Social media, Internet, Television
2019-12-30 17:44:10	Agree	Yes	Jordan University of Science and Technology	Female	22	4th years	More than 2000	Urban	Non-Jordanian	No		Yes	Infection	Multiple sexual partners, Infection with HPV, Smoking, Family history of the disease, Contraception (Intrauterine device/oral contraceptives)	Lower abdominal pain, Bleeding per vagina, Discharge per vagina, Menstrual problems, Itching, Weight loss, Swelling of cervix, Post coital bleeding (spotting or bleeding unrelated to menstruation that occurs during or after sexual intercourse), Anemia	Don't know	5 Years	Don't know	Don't know	Don't know	Yes	Sexual	Pap smear	Genital warts	Cervical carcinoma	Don't know	51 and above Years	Don't know	Don't know	Don't know	Don't know	1	Don't know	Inadequate information	Internet
2019-12-30 17:44:13	Agree	Yes	Jordan University of Science and Technology	Male	25	5th years	501- 1000	Urban	Jordanian	No	Almafrq	Yes	Infection	Multiple sexual partners, Infection with HPV, Smoking, Family history of the disease, Nulliparity (Never married)	Lower abdominal pain, Bleeding per vagina, Menstrual problems, Post coital bleeding (spotting or bleeding unrelated to menstruation that occurs during or after sexual intercourse), Anemia	5 Years	2 Years	Yes	Yes	Yes	Yes	Sexual	Pap smear, PCR (Polymerase chain reaction)	Genital warts	Cervical carcinoma	Don't know	30-50 Years	Don't know	Yes	Don't know	Don't know	0.9	Yes	high cost, Inadequate information	Medical school teachings, Internet
2019-12-30 17:45:16	Agree	Yes	Jordan University of Science and Technology	Female	19	3th years	More than 2000	Urban	Non-Jordanian	No		No	Infection	Multiple sexual partners, Infection with HPV, Poor hygiene, Contraception (Intrauterine device/oral contraceptives)	Discharge per vagina, Itching, Post coital bleeding (spotting or bleeding unrelated to menstruation that occurs during or after sexual intercourse)	3 Years	3Years	No	No	Yes	Yes	Sexual	Pap smear	Don't know	Don't know	Don't know	30-50 Years	Yes	Yes	Don't know	Don't know	Don't know	Yes	Inadequate information	Social media, Internet
2019-12-30 17:45:34	Agree	Yes	Jordan University of Science and Technology	Female	18	3th years	501- 1000	Rural	Jordanian	Yes	Irbid	Yes	Environmental	Infection with HPV, Smoking, Family history of the disease	No symptoms, Fever, Discharge per vagina, Weight loss, Anemia	3 Years	2 Years	No	Yes	Don't know	Don't know	Don't know	Don't know	Don't know	Don't know	Don't know	51 and above Years	Don't know	Don't know	Don't know	Don't know	1	Don't know	high cost, Worry about efficacy of vaccine	Internet
2019-12-30 17:45:40	Agree	Yes	Jordan University of Science and Technology	Male	21	4th years	501- 1000	Urban	Non-Jordanian	No		No	Infection	Infection with HPV, Smoking, Nulliparity (Never married)	Bleeding per vagina, Post coital bleeding (spotting or bleeding unrelated to menstruation that occurs during or after sexual intercourse)	2 Years	Don't know	Don't know	Yes	Don't know	Yes	Sexual	Don't know	Genital warts	Cervical carcinoma	Don't know	11-29 Years	Don't know	Don't know	Don't know	Don't know	Don't know	Yes	Worry about complications	Internet
2019-12-30 17:45:57	Agree	Yes	Jordan University of Science and Technology	Male	22	5th years	More than 2000	Urban	Jordanian	No	Irbid	No	Genetic	Multiple sexual partners, Infection with HPV, Family history of the disease, Old age	Bleeding per vagina, Menstrual problems, Itching, Weight loss, Post coital bleeding (spotting or bleeding unrelated to menstruation that occurs during or after sexual intercourse), Anemia	5 Years	3Years	No	Yes	Yes	Yes	Sexual	Blood test, PCR (Polymerase chain reaction)	Cervical carcinoma	Genital warts	Don't know	30-50 Years	Don't know	Yes	No	Don't know	0.7	Don't know	Worry about efficacy of vaccine, Inadequate information	Social media
2019-12-30 17:50:44	Agree	Yes	Jordan University of Science and Technology	Male	24	5th years	More than 2000	Urban	Non-Jordanian	No		No	Infection	Multiple sexual partners, Infection with HPV, Early age of first coitus, Smoking, Family history of the disease, Contraception (Intrauterine device/oral contraceptives)	Lower abdominal pain, Bleeding per vagina, Menstrual problems, Weight loss, Swelling of cervix, Post coital bleeding (spotting or bleeding unrelated to menstruation that occurs during or after sexual intercourse), Anemia	Don't know	Don't know	No	Yes	Don't know	Yes	Don't know	Blood test, Pap smear, PCR (Polymerase chain reaction)	Genital warts	Cervical carcinoma	Yes	0-10 Years	Yes	No	Yes	Don't know	0.9	Don't know	high cost, Inadequate information	Medical school teachings
2019-12-30 17:58:53	Agree	Yes	Jordan University of Science and Technology	Female	24	6th years	1001 - 1499	Rural	Jordanian	No	Irbid	No	Infection	Multiple sexual partners, Infection with HPV, Early age of first coitus, Family history of the disease, Old age	No symptoms, Bleeding per vagina, Discharge per vagina, Itching, Weight loss, Swelling of cervix, Post coital bleeding (spotting or bleeding unrelated to menstruation that occurs during or after sexual intercourse), Anemia	3 Years	2 Years	No	Yes	Yes	Yes	Sexual	Blood test, Pap smear, PCR (Polymerase chain reaction)	Genital warts	Cervical carcinoma	Don't know	11-29 Years	Don't know	Don't know	No	Don't know	Don't know	No	high cost	Medical school teachings
2019-12-30 17:58:53	Agree	Yes	Jordan University of Science and Technology	Female	20	3th years	1001 - 1499	Urban	Jordanian	No	Amman	No	Infection	Multiple sexual partners, Infection with HPV, Poor hygiene, Smoking, Family history of the disease, Contraception (Intrauterine device/oral contraceptives)	Lower abdominal pain, Bleeding per vagina, Discharge per vagina, Menstrual problems, Weight loss, Swelling of cervix, Post coital bleeding (spotting or bleeding unrelated to menstruation that occurs during or after sexual intercourse)	Don't know	Don't know	No	Yes	Yes	Yes	Sexual	Blood test, Pap smear, PCR (Polymerase chain reaction), Biopsy	Genital warts	Cervical carcinoma	Don't know	11-29 Years	Yes	Yes	No	Don't know	0.9	Yes	high cost, Worry about complications, Worry about efficacy of vaccine	Medical school teachings
2019-12-30 17:59:13	Agree	Yes	Jordan University of Science and Technology	Male	24	6th years	1500 - 2000	Rural	Jordanian	No	Irbid	Yes	Infection	Multiple sexual partners, Infection with HPV, Poor hygiene, Family history of the disease	Bleeding per vagina, Discharge per vagina, Menstrual problems, Weight loss	Don't know	Don't know	No	No	Yes	Yes	Sexual	Blood test, Pap smear	Genital warts	Cervical carcinoma	Don't know	11-29 Years	Don't know	Yes	No	Don't know	Don't know	Yes	high cost, Worry about complications	Medical school teachings
2019-12-30 18:02:18	Agree	Yes	Jordan University of Science and Technology	Male	21	4th years	More than 2000	Urban	Jordanian	No	Amman	Yes	Infection	Multiple sexual partners, Infection with HPV, Family history of the disease	Menstrual problems, Swelling of cervix	Don't know	Don't know	Don't know	Don't know	Don't know	Yes	Sexual	Pap smear	Cervical carcinoma	Genital warts	No	11-29 Years	Don't know	Don't know	No	Don't know	Don't know	No	high cost, Worry about efficacy of vaccine	Medical school teachings
2019-12-30 18:14:26	Agree	Yes	Jordan University of Science and Technology	Female	22	5th years	501- 1000	Urban	Jordanian	No	Irbid	Yes	Infection	Multiple sexual partners, Infection with HPV, Poor hygiene, Early age of first coitus, Smoking, Family history of the disease, Old age, Contraception (Intrauterine device/oral contraceptives)	No symptoms, Lower abdominal pain, Bleeding per vagina, Fever, Discharge per vagina, Menstrual problems, Itching, Weight loss, Swelling of cervix, Post coital bleeding (spotting or bleeding unrelated to menstruation that occurs during or after sexual intercourse), Anemia	3 Years	5 Years	No	Yes	No	Yes	Sexual	Pap smear, PCR (Polymerase chain reaction)	Genital warts	Cervical carcinoma	Don't know	11-29 Years	Don't know	Don't know	Don't know	One	Don't know	No	high cost, Inadequate information	Medical school teachings
2019-12-30 18:17:45	Agree	Yes	Jordan University of Science and Technology	Female	21	4th years	More than 2000	Urban	Jordanian	Yes	Irbid	No	Infection	Multiple sexual partners, Infection with HPV, Poor hygiene, Early age of first coitus	Lower abdominal pain, Bleeding per vagina, Discharge per vagina, Weight loss, Swelling of cervix, Post coital bleeding (spotting or bleeding unrelated to menstruation that occurs during or after sexual intercourse), Anemia	3 Years	5 Years	No	Yes	Yes	Yes	Sexual	Pap smear, PCR (Polymerase chain reaction)	Genital warts	Cervical carcinoma	Yes	11-29 Years	Yes	Yes	No	Three	0.9	Yes	Worry about complications	Medical school teachings, Internet
2019-12-30 18:33:45	Agree	Yes	Jordan University of Science and Technology	Male	21	4th years	More than 2000	Urban	Non-Jordanian	Yes		No	Infection	Multiple sexual partners, Poor hygiene, Smoking	Bleeding per vagina, Fever, Discharge per vagina, Weight loss	4 Years	2 Years	No	Yes	Yes	Yes	Sexual	Pap smear	Don't know	Don't know	Don't know	11-29 Years	Yes	Yes	No	Don't know	Don't know	Don't know	high cost, Inadequate information	Medical school teachings, Social media
2019-12-30 18:46:37	Agree	Yes	Jordan University of Science and Technology	Female	22	5th years	1500 - 2000	Urban	Jordanian	No	Irbid	Yes	Infection	Multiple sexual partners, Infection with HPV, Poor hygiene, Early age of first coitus, Smoking	No symptoms, Post coital bleeding (spotting or bleeding unrelated to menstruation that occurs during or after sexual intercourse)	2 Years	5 Years	Yes	Yes	No	Yes	Sexual	Pap smear	Genital warts	Cervical carcinoma	No	0-10 Years	Don't know	Don't know	Don't know	One	Don't know	Yes	Inadequate information	Medical school teachings
2019-12-30 18:52:09	Agree	Yes	Jordan University of Science and Technology	Male	22	5th years	More than 2000	Urban	Jordanian	No	Irbid	Yes	Infection	Multiple sexual partners, Infection with HPV, Early age of first coitus, Smoking, Family history of the disease, Old age	Lower abdominal pain, Bleeding per vagina, Post coital bleeding (spotting or bleeding unrelated to menstruation that occurs during or after sexual intercourse)	Don't know	Don't know	Yes	Yes	Don't know	Yes	Sexual	Pap smear	Genital warts	Cervical carcinoma	Don't know	30-50 Years	Don't know	No	No	Don't know	0.9	Yes	Inadequate information	Medical school teachings, Internet
2019-12-30 19:19:04	Agree	Yes	Jordan University of Science and Technology	Female	21	4th years	1001 - 1499	Urban	Jordanian	No	Irbid	No	Infection	Multiple sexual partners, Infection with HPV, Family history of the disease	Lower abdominal pain, Bleeding per vagina, Discharge per vagina, Menstrual problems, Weight loss, Swelling of cervix, Anemia	Don't know	Don't know	Yes	Yes	Yes	Yes	Sexual	Pap smear, Don't know	Don't know	Cervical carcinoma	No	11-29 Years	Yes	Yes	Don't know	Don't know	0.5	Yes	high cost	Medical school teachings
2019-12-30 19:20:00	Agree	Yes	Jordan University of Science and Technology	Male	19	3th years	501- 1000	Urban	Jordanian	Yes	Azarqa	No	Infection	Multiple sexual partners, Infection with HPV, Poor hygiene, Early age of first coitus, Smoking, Family history of the disease, Old age, Contraception (Intrauterine device/oral contraceptives), Nulliparity (Never married)	Lower abdominal pain, Bleeding per vagina, Discharge per vagina, Menstrual problems, Swelling of cervix, Post coital bleeding (spotting or bleeding unrelated to menstruation that occurs during or after sexual intercourse), Anemia	Don't know	Don't know	Don't know	Don't know	Don't know	Yes	Sexual	Blood test, Biopsy	Don't know	Don't know	Don't know	11-29 Years	Yes	Yes	Don't know	Don't know	0.9	Yes	high cost, Worry about efficacy of vaccine, Inadequate information	Medical school teachings, Internet
2019-12-30 19:28:53	Agree	Yes	Jordan University of Science and Technology	Male	22	5th years	More than 2000	Urban	Jordanian	No	Amman	Yes	Infection	Multiple sexual partners, Infection with HPV, Poor hygiene, Early age of first coitus, Smoking, Family history of the disease	No symptoms, Bleeding per vagina, Weight loss, Swelling of cervix, Post coital bleeding (spotting or bleeding unrelated to menstruation that occurs during or after sexual intercourse)	Don't know	Don't know	Don't know	Yes	Yes	Yes	Sexual	Blood test, Pap smear, PCR (Polymerase chain reaction), Biopsy	Genital warts	Cervical carcinoma	Don't know	11-29 Years	Don't know	Don't know	Yes	Don't know	0.5	No	high cost, Worry about complications, Inadequate information	Medical school teachings
2019-12-30 19:42:55	Agree	Yes	Jordan University of Science and Technology	Female	22	5th years	501- 1000	Urban	Jordanian	No	Amman	No	Infection	Multiple sexual partners, Infection with HPV, Early age of first coitus	Lower abdominal pain, Bleeding per vagina, Discharge per vagina, Weight loss, Swelling of cervix, Post coital bleeding (spotting or bleeding unrelated to menstruation that occurs during or after sexual intercourse), Anemia	3 Years	2 Years	No	Yes	Yes	Yes	Sexual	Pap smear, Biopsy	Genital warts	Cervical carcinoma	Don't know	30-50 Years	Don't know	Don't know	Don't know	Don't know	0.9	No	high cost	Medical school teachings
2019-12-30 19:54:53	Agree	Yes	Jordan University of Science and Technology	Male	22	5th years	More than 2000	Urban	Jordanian	No	Amman	No	Infection	Multiple sexual partners, Infection with HPV, Poor hygiene, Smoking, Family history of the disease, Old age	Lower abdominal pain, Bleeding per vagina, Menstrual problems, Weight loss, Post coital bleeding (spotting or bleeding unrelated to menstruation that occurs during or after sexual intercourse)	3 Years	2 Years	Don't know	Yes	Don't know	Yes	Sexual	Pap smear	Genital warts	Cervical carcinoma	Don't know	11-29 Years	Don't know	Don't know	Don't know	Don't know	Don't know	Yes	high cost	Medical school teachings
2019-12-30 20:05:18	Agree	Yes	Jordan University of Science and Technology	Female	20	3th years	1500 - 2000	Urban	Jordanian	No	Irbid	Yes	Infection	Multiple sexual partners, Infection with HPV, Smoking, Family history of the disease, Contraception (Intrauterine device/oral contraceptives)	Lower abdominal pain, Bleeding per vagina, Discharge per vagina, Menstrual problems, Itching, Weight loss, Swelling of cervix, Post coital bleeding (spotting or bleeding unrelated to menstruation that occurs during or after sexual intercourse), Anemia	Don't know	Don't know	No	Yes	Yes	Yes	Sexual	Blood test, PCR (Polymerase chain reaction)	Plantar warts	Cervical carcinoma	Yes	30-50 Years	No	Yes	Don't know	Don't know	Don't know	Yes	high cost, Inadequate information	Medical school teachings, Internet
2019-12-30 20:45:24	Agree	Yes	Jordan University of Science and Technology	Male	21	4th years	1001 - 1499	Urban	Jordanian	No	Irbid	No	Infection	Multiple sexual partners, Infection with HPV, Early age of first coitus, Nulliparity (Never married)	Discharge per vagina, Itching, Swelling of cervix	Don't know	Don't know	No	Yes	Don't know	Yes	Blood	Blood test, Pap smear, PCR (Polymerase chain reaction)	Genital warts	Cervical carcinoma	Yes	11-29 Years	Yes	Don't know	Don't know	Don't know	0.5	Yes	Inadequate information	Medical school teachings
2019-12-30 20:54:30	Agree	Yes	Jordan University of Science and Technology	Male	18	3th years	1500 - 2000	Rural	Jordanian	No	Irbid	No	Infection	Family history of the disease	No symptoms, Menstrual problems	2 Years	4 Years	Don't know	Don't know	Don't know	No	Don't know	Don't know	Don't know	Don't know	Don't know	30-50 Years	Don't know	Don't know	No	Four	Don't know	Yes	Worry about complications	Medical school teachings
2019-12-30 21:47:27	Agree	Yes	Jordan University of Science and Technology	Male	21	4th years	More than 2000	Urban	Jordanian	No	Irbid	No	Genetic	Infection with HPV, Poor hygiene, Early age of first coitus, Smoking, Family history of the disease, Old age, Contraception (Intrauterine device/oral contraceptives)	Lower abdominal pain, Fever, Menstrual problems, Itching, Weight loss, Swelling of cervix, Post coital bleeding (spotting or bleeding unrelated to menstruation that occurs during or after sexual intercourse), Anemia	Don't know	Don't know	No	Yes	Yes	Yes	Sexual	PCR (Polymerase chain reaction)	Genital warts	Cervical carcinoma	No	11-29 Years	Yes	Don't know	Don't know	Don't know	Don't know	Yes	high cost, Inadequate information	Medical school teachings, Books
2019-12-30 22:38:50	Agree	Yes	Jordan University of Science and Technology	Male	24	6th years	501- 1000	Urban	Non-Jordanian	No		Yes	Infection	Multiple sexual partners, Infection with HPV, Poor hygiene, Early age of first coitus, Family history of the disease	No symptoms, Lower abdominal pain, Bleeding per vagina, Discharge per vagina, Menstrual problems, Weight loss, Swelling of cervix, Post coital bleeding (spotting or bleeding unrelated to menstruation that occurs during or after sexual intercourse), Anemia	3 Years	5 Years	No	Yes	Yes	Yes	Sexual	Pap smear, Biopsy	Genital warts	Cervical carcinoma	Yes	11-29 Years	Yes	Yes	No	Three	0.9	Yes	high cost	Medical school teachings
2019-12-30 22:56:14	Agree	Yes	Jordan University of Science and Technology	Female	20	3th years	More than 2000	Urban	Jordanian	No	Irbid	Yes	Infection	Multiple sexual partners, Infection with HPV, Poor hygiene, Smoking, Contraception (Intrauterine device/oral contraceptives)	Discharge per vagina, Menstrual problems, Itching, Post coital bleeding (spotting or bleeding unrelated to menstruation that occurs during or after sexual intercourse)	Don't know	Don't know	Yes	Yes	Yes	Yes	Sexual	Blood test, Pap smear, Biopsy	Genital warts	Cervical carcinoma	Don't know	30-50 Years	Don't know	Yes	No	One	0.9	Yes	high cost, Inadequate information	Medical school teachings
2019-12-30 22:57:18	Agree	Yes	Jordan University of Science and Technology	Male	20	3th years	1001 - 1499	Urban	Jordanian	No	Irbid	No	Infection	Multiple sexual partners, Infection with HPV, Poor hygiene, Smoking, Family history of the disease, Old age, Contraception (Intrauterine device/oral contraceptives)	Lower abdominal pain, Bleeding per vagina, Fever, Discharge per vagina, Menstrual problems, Itching, Weight loss, Swelling of cervix, Post coital bleeding (spotting or bleeding unrelated to menstruation that occurs during or after sexual intercourse)	Don't know	Don't know	No	Yes	Yes	Yes	Sexual	Blood test, Pap smear, Biopsy	Don't know	Don't know	Yes	0-10 Years	Yes	Yes	No	Don't know	Don't know	Yes	high cost	Medical school teachings, Newspapers, Books, Internet
2019-12-31 03:43:21	Agree	Yes	Yarmouk University	Female	25	6th years	Less than 500	Urban	Jordanian	No	Irbid	Yes	Infection	Multiple sexual partners, Infection with HPV, Family history of the disease	Bleeding per vagina, Discharge per vagina, Itching, Swelling of cervix, Post coital bleeding (spotting or bleeding unrelated to menstruation that occurs during or after sexual intercourse), Anemia	2 Years	5 Years	No	Yes	Don't know	Yes	Don't know	Pap smear	Cervical carcinoma	Genital warts	No	11-29 Years	Don't know	Don't know	Don't know	Don't know	Don't know	Yes	high cost, Worry about complications, Worry about efficacy of vaccine, Inadequate information	Medical school teachings, Social media
2019-12-31 11:46:26	Agree	Yes	Jordan University of Science and Technology	Male	22	5th years	1001 - 1499	Urban	Non-Jordanian	No		Yes	Infection	Multiple sexual partners, Infection with HPV, Family history of the disease, Contraception (Intrauterine device/oral contraceptives)	Fever, Discharge per vagina, Itching, Swelling of cervix, Anemia	2 Years	5 Years	No	Yes	Yes	Yes	Sexual	Blood test, Pap smear, PCR (Polymerase chain reaction)	Cervical carcinoma	Genital warts	Yes	11-29 Years	No	Yes	No	Three	0.5	No	high cost, Worry about complications, Worry about efficacy of vaccine	Medical school teachings
2019-12-31 18:29:30	Agree	Yes	Jordan University of Science and Technology	Female	22	5th years	More than 2000	Urban	Jordanian	No	Amman	Yes	Infection	Multiple sexual partners, Infection with HPV, Early age of first coitus, Smoking, Family history of the disease, Old age	Lower abdominal pain, Bleeding per vagina, Discharge per vagina, Weight loss, Post coital bleeding (spotting or bleeding unrelated to menstruation that occurs during or after sexual intercourse), Anemia	Don't know	Don't know	No	Yes	Yes	Yes	Sexual	PCR (Polymerase chain reaction), Biopsy	Genital warts	Cervical carcinoma	Don't know	11-29 Years	Don't know	Don't know	Don't know	Don't know	0.7	Yes	high cost, Worry about complications, Worry about efficacy of vaccine, Inadequate information	Medical school teachings
2020-01-01 00:58:43	Agree	Yes	Jordan University of Science and Technology	Male	22	5th years	Less than 500	Urban	Jordanian	No	Amman	Yes	Genetic	Multiple sexual partners, Infection with HPV, Early age of first coitus, Smoking, Family history of the disease, Old age, Nulliparity (Never married)	No symptoms, Lower abdominal pain, Bleeding per vagina, Fever, Discharge per vagina, Menstrual problems, Itching, Weight loss, Swelling of cervix, Post coital bleeding (spotting or bleeding unrelated to menstruation that occurs during or after sexual intercourse), Anemia	5 Years	2 Years	No	Yes	Yes	Yes	Sexual	Pap smear	Genital warts	Cervical carcinoma	Yes	11-29 Years	Yes	No	Yes	One	0.9	Yes	high cost, Worry about complications, Worry about efficacy of vaccine, Inadequate information	Medical school teachings
2020-01-02 15:05:07	Agree	Yes	Jordan University of Science and Technology	Male	24	5th years	More than 2000	Urban	Non-Jordanian	No		Yes	Infection	Multiple sexual partners, Infection with HPV, Poor hygiene, Family history of the disease, Contraception (Intrauterine device/oral contraceptives)	Bleeding per vagina, Discharge per vagina, Menstrual problems, Swelling of cervix	Don't know	Don't know	Yes	Yes	Yes	Yes	Sexual	Pap smear	Genital warts	Cervical carcinoma	Don't know	30-50 Years	Don't know	Yes	Don't know	Don't know	Don't know	Yes	high cost, Inadequate information	Medical school teachings
2020-01-03 11:00:02	Agree	Yes	Albalqa University	Female	22	5th years	1001 - 1499	Urban	Jordanian	No	Amman	Yes	Infection	Multiple sexual partners, Infection with HPV, Family history of the disease, Contraception (Intrauterine device/oral contraceptives), Nulliparity (Never married)	Bleeding per vagina, Discharge per vagina, Menstrual problems, Weight loss, Anemia	3 Years	5 Years	Yes	Yes	No	No	Sexual	Pap smear, PCR (Polymerase chain reaction)	Genital warts	Cervical carcinoma	Don't know	11-29 Years	Yes	Don't know	Yes	Two	0.7	No	Inadequate information	Medical school teachings
2020-01-04 12:50:11	Agree	Yes	Albalqa University	Female	22	5th years	1001 - 1499	Urban	Jordanian	No	Irbid	No	Infection	Multiple sexual partners, Infection with HPV, Early age of first coitus, Family history of the disease, Contraception (Intrauterine device/oral contraceptives)	No symptoms, Bleeding per vagina, Discharge per vagina, Weight loss	3 Years	Don't know	Don't know	Yes	Yes	Yes	Sexual	Pap smear, Biopsy	Genital warts	Cervical carcinoma	Don't know	11-29 Years	Yes	Yes	Don't know	Two	Don't know	No	high cost, Inadequate information	Medical school teachings
2020-01-06 16:21:48	Agree	Yes	University of Jordan	Female	27	6th years	1500 - 2000	Urban	Jordanian	No	Amman	No	Infection	Multiple sexual partners, Infection with HPV	No symptoms, Bleeding per vagina, Discharge per vagina, Menstrual problems, Itching, Swelling of cervix, Post coital bleeding (spotting or bleeding unrelated to menstruation that occurs during or after sexual intercourse), Anemia	5 Years	3Years	No	Yes	Yes	Yes	Sexual	Pap smear, Biopsy	Genital warts	Don't know	Yes	11-29 Years	Don't know	Yes	Yes	Don't know	1	No	Worry about efficacy of vaccine	Medical school teachings
2020-01-06 16:31:25	Agree	Yes	University of Jordan	Male	25	4th years	501- 1000	Urban	Jordanian	No	Amman	Yes	Infection	Multiple sexual partners, Infection with HPV, Family history of the disease	Lower abdominal pain, Itching	Don't know	Don't know	No	Yes	Yes	Yes	Sexual	Pap smear	Genital warts	Cervical carcinoma	Don't know	11-29 Years	Don't know	Yes	Don't know	Don't know	0.7	Yes	Worry about complications, Inadequate information	Medical school teachings
2020-01-15 01:27:42	Agree	Yes	Jordan University of Science and Technology	Female	20	3th years	1500 - 2000	Urban	Jordanian	No	Amman	Yes	Infection	Multiple sexual partners, Infection with HPV, Poor hygiene, Family history of the disease, Old age	Lower abdominal pain, Bleeding per vagina, Fever, Menstrual problems, Weight loss, Swelling of cervix	3 Years	2 Years	Yes	Yes	Don't know	Yes	Sexual	Blood test	Don't know	Don't know	Yes	11-29 Years	No	No	No	Three	0.7	Yes	high cost, Inadequate information	Friends, Social media
2020-01-22 19:19:07	Agree	Yes	Jordan University of Science and Technology	Male	24	6th years	More than 2000	Urban	Jordanian	No	Irbid	Yes	Genetic	Multiple sexual partners, Infection with HPV, Poor hygiene, Early age of first coitus, Family history of the disease, Nulliparity (Never married)	Lower abdominal pain, Bleeding per vagina, Fever, Discharge per vagina, Menstrual problems, Itching	Don't know	2 Years	Yes	Yes	Yes	Yes	Sexual	Blood test, Pap smear, PCR (Polymerase chain reaction), Biopsy	Genital warts	Genital warts	Yes	11-29 Years	Yes	Yes	Yes	Don't know	Don't know	Yes	Worry about complications	Medical school teachings
2020-01-22 19:29:22	Agree	Yes	Jordan University of Science and Technology	Male	24	6th years	More than 2000	Urban	Jordanian	No	Irbid	Yes	Infection	Multiple sexual partners, Infection with HPV, Early age of first coitus, Smoking, Family history of the disease, Old age, Contraception (Intrauterine device/oral contraceptives)	Lower abdominal pain, Bleeding per vagina, Itching, Swelling of cervix	2 Years	5 Years	Yes	Yes	Yes	Yes	Sexual	Blood test, Pap smear, PCR (Polymerase chain reaction)	Genital warts	Cervical carcinoma	Yes	11-29 Years	Yes	Yes	No	Don't know	0.9	Yes	Inadequate information	Medical school teachings
2020-01-22 19:30:24	Agree	Yes	Jordan University of Science and Technology	Male	24	6th years	Less than 500	Urban	Jordanian	No	Irbid	No	Infection	Multiple sexual partners, Infection with HPV, Poor hygiene, Early age of first coitus, Smoking	Lower abdominal pain, Bleeding per vagina, Discharge per vagina, Itching, Weight loss, Post coital bleeding (spotting or bleeding unrelated to menstruation that occurs during or after sexual intercourse)	3 Years	5 Years	No	Yes	Yes	Yes	Sexual	Pap smear, Biopsy	Genital warts	Cervical carcinoma	Yes	11-29 Years	No	No	Yes	Three	Don't know	Yes	high cost, Inadequate information	Medical school teachings, Books
2020-01-22 20:09:07	Agree	Yes	Jordan University of Science and Technology	Male	25	6th years	More than 2000	Urban	Non-Jordanian	Yes		Yes	Genetic	Smoking, Family history of the disease, Nulliparity (Never married)	Bleeding per vagina, Menstrual problems	Don't know	Don't know	No	Don't know	Don't know	Don't know	Don't know	Pap smear	Don't know	Don't know	Don't know	11-29 Years	Don't know	Don't know	Don't know	Don't know	Don't know	Don't know	high cost, Worry about complications, Inadequate information	Medical school teachings, Newspapers, Friends, Books, Social media, Internet, Television
2020-01-22 23:43:24	Agree	Yes	Jordan University of Science and Technology	Male	26	6th years	1001 - 1499	Rural	Non-Jordanian	No		No	Genetic	Infection with HPV, Poor hygiene, Early age of first coitus, Family history of the disease, Nulliparity (Never married)	Menstrual problems, Post coital bleeding (spotting or bleeding unrelated to menstruation that occurs during or after sexual intercourse)	Don't know	Don't know	Don't know	Don't know	Don't know	Don't know	Environmental	Pap smear	Cervical carcinoma	Genital warts	Yes	0-10 Years	Yes	No	Yes	Three	0.9	Yes	Worry about complications, Inadequate information	Medical school teachings, Newspapers, Books, Social media, Internet, Television
2020-01-23 20:48:51	Agree	Yes	Jordan University of Science and Technology	Male	21	4th years	More than 2000	Urban	Jordanian	No	Irbid	Yes	Infection	Multiple sexual partners, Infection with HPV, Family history of the disease, Old age, Contraception (Intrauterine device/oral contraceptives)	Lower abdominal pain, Bleeding per vagina, Discharge per vagina, Menstrual problems, Weight loss	Don't know	Don't know	Don't know	Don't know	Don't know	Yes	Sexual	Pap smear	Don't know	Genital warts	Don't know	11-29 Years	Yes	Yes	Don't know	Don't know	Don't know	Yes	Inadequate information	Medical school teachings, Social media
2020-02-03 23:21:36	Agree	Yes	Yarmouk University	Male	24	6th years	More than 2000	Urban	Jordanian	No	Amman	No	Infection	Multiple sexual partners, Infection with HPV, Early age of first coitus, Smoking, Family history of the disease, Contraception (Intrauterine device/oral contraceptives)	No symptoms, Bleeding per vagina, Discharge per vagina, Itching, Weight loss, Post coital bleeding (spotting or bleeding unrelated to menstruation that occurs during or after sexual intercourse), Anemia	3 Years	3Years	No	Yes	Yes	Yes	Sexual	Pap smear, Biopsy	Genital warts	Cervical carcinoma	Yes	11-29 Years	Yes	Don't know	Don't know	Two	0.9	Yes	Worry about complications	Medical school teachings, Books
2020-02-03 23:22:07	Agree	Yes	Yarmouk University	Female	23	5th years	More than 2000	Rural	Jordanian	No	Irbid	Yes	Infection	Multiple sexual partners, Infection with HPV, Poor hygiene, Early age of first coitus, Family history of the disease	No symptoms, Post coital bleeding (spotting or bleeding unrelated to menstruation that occurs during or after sexual intercourse)	3 Years	2 Years	No	Yes	Yes	Yes	Sexual	Pap smear	Genital warts	Cervical carcinoma	Don't know	11-29 Years	Yes	Don't know	Don't know	Don't know	0.9	Yes	Inadequate information	Medical school teachings
2020-02-03 23:23:43	Agree	Yes	Yarmouk University	Female	24	6th years	1500 - 2000	Rural	Jordanian	No	Irbid	No	Infection	Multiple sexual partners, Infection with HPV, Early age of first coitus, Smoking, Contraception (Intrauterine device/oral contraceptives)	No symptoms, Lower abdominal pain, Bleeding per vagina, Fever, Discharge per vagina, Weight loss, Swelling of cervix, Post coital bleeding (spotting or bleeding unrelated to menstruation that occurs during or after sexual intercourse)	3 Years	5 Years	No	Yes	Yes	Yes	Sexual	Pap smear, PCR (Polymerase chain reaction), Biopsy	Genital warts	Cervical carcinoma	Yes	11-29 Years	Yes	No	Yes	Three	0.7	Yes	high cost	Medical school teachings
2020-02-03 23:54:35	Agree	Yes	Yarmouk University	Female	22	4th years	1001 - 1499	Urban	Jordanian	No	Irbid	Yes	Infection	Multiple sexual partners, Infection with HPV, Early age of first coitus, Smoking, Family history of the disease, Old age, Contraception (Intrauterine device/oral contraceptives)	Lower abdominal pain, Bleeding per vagina, Discharge per vagina, Itching, Swelling of cervix, Post coital bleeding (spotting or bleeding unrelated to menstruation that occurs during or after sexual intercourse), Anemia	5 Years	2 Years	No	Yes	Yes	Yes	Sexual	Pap smear	Plantar warts	Genital warts	Don't know	11-29 Years	Yes	No	Yes	Don't know	0.7	No	Inadequate information	Medical school teachings
2020-02-03 23:57:15	Agree	Yes	Yarmouk University	Female	23	5th years	501- 1000	Urban	Jordanian	No	Irbid	No	Infection	Multiple sexual partners, Infection with HPV, Smoking	Discharge per vagina, Menstrual problems, Weight loss, Post coital bleeding (spotting or bleeding unrelated to menstruation that occurs during or after sexual intercourse)	3 Years	5 Years	Yes	Yes	Don't know	Yes	Sexual	Pap smear, PCR (Polymerase chain reaction)	Genital warts	Cervical carcinoma	Yes	11-29 Years	Yes	Don't know	Yes	Four	Don't know	Yes	high cost, Inadequate information	Medical school teachings
2020-02-03 23:59:18	Agree	Yes	Yarmouk University	Male	24	6th years	Less than 500	Rural	Jordanian	No	Irbid	Yes	Infection	Multiple sexual partners, Infection with HPV, Early age of first coitus, Smoking, Family history of the disease	No symptoms, Bleeding per vagina, Discharge per vagina, Itching, Swelling of cervix, Post coital bleeding (spotting or bleeding unrelated to menstruation that occurs during or after sexual intercourse), Anemia	3 Years	5 Years	No	Yes	Yes	Yes	Sexual	Biopsy	Genital warts	Cervical carcinoma	Yes	11-29 Years	Yes	No	Yes	Three	0.7	Yes	high cost	Medical school teachings
2020-02-04 00:10:01	Agree	Yes	Yarmouk University	Female	21	3th years	501- 1000	Rural	Jordanian	No	Ajl'on	Yes	Infection	Multiple sexual partners, Infection with HPV, Poor hygiene, Early age of first coitus, Smoking, Family history of the disease	Lower abdominal pain, Bleeding per vagina, Menstrual problems	Don't know	Don't know	Don't know	Don't know	Yes	Yes	Sexual	Pap smear	Plantar warts	Don't know	Don't know	11-29 Years	Don't know	Yes	Don't know	Don't know	Don't know	Yes	Inadequate information	Medical school teachings
2020-02-04 00:51:44	Agree	Yes	Yarmouk University	Male	24	6th years	More than 2000	Urban	Jordanian	No	Amman	Yes	Infection	Multiple sexual partners, Infection with HPV, Early age of first coitus, Smoking, Family history of the disease	No symptoms, Bleeding per vagina, Post coital bleeding (spotting or bleeding unrelated to menstruation that occurs during or after sexual intercourse)	5 Years	Don't know	No	Yes	Yes	Yes	Sexual	Pap smear	Genital warts	Cervical carcinoma	Don't know	11-29 Years	Yes	No	No	Don't know	Don't know	Yes	Inadequate information	Medical school teachings
2020-02-04 09:37:42	Agree	Yes	Yarmouk University	Female	24	6th years	More than 2000	Urban	Non-Jordanian	No		No	Infection	Multiple sexual partners, Infection with HPV, Poor hygiene, Early age of first coitus, Smoking	No symptoms, Lower abdominal pain, Bleeding per vagina, Discharge per vagina, Post coital bleeding (spotting or bleeding unrelated to menstruation that occurs during or after sexual intercourse)	5 Years	2 Years	No	Don't know	Yes	Yes	Sexual	Pap smear, Biopsy	Genital warts	Cervical carcinoma	Don't know	11-29 Years	Don't know	Don't know	No	Two	Don't know	Don't know	Worry about complications, Inadequate information	Internet
2020-02-04 18:32:46	Agree	Yes	Yarmouk University	Female	23	4th years	501- 1000	Urban	Jordanian	No	Irbid	No	Environmental	Multiple sexual partners, Infection with HPV, Smoking, Family history of the disease, Old age	No symptoms, Lower abdominal pain, Bleeding per vagina, Itching, Weight loss, Swelling of cervix, Post coital bleeding (spotting or bleeding unrelated to menstruation that occurs during or after sexual intercourse), Anemia	Don't know	2 Years	No	Yes	Yes	Yes	Sexual	Pap smear, PCR (Polymerase chain reaction)	Cervical carcinoma	Genital warts	Yes	30-50 Years	Yes	Don't know	Don't know	Don't know	0.7	Don't know	high cost, Inadequate information	Medical school teachings, Internet
2020-02-04 18:45:06	Agree	Yes	Yarmouk University	Female	20	4th years	1500 - 2000	Urban	Jordanian	No	Irbid	Yes	Genetic	Multiple sexual partners, Infection with HPV, Early age of first coitus, Family history of the disease, Old age, Contraception (Intrauterine device/oral contraceptives)	Lower abdominal pain, Bleeding per vagina, Discharge per vagina, Menstrual problems, Itching, Weight loss, Swelling of cervix, Post coital bleeding (spotting or bleeding unrelated to menstruation that occurs during or after sexual intercourse)	4 Years	2 Years	No	Don't know	Yes	Yes	Sexual	Biopsy	Genital warts	Cervical carcinoma	No	51 and above Years	Yes	Yes	Yes	Three	1	No	high cost, Worry about complications	Medical school teachings, Internet
2020-02-04 21:31:09	Agree	Yes	Yarmouk University	Female	23	6th years	1500 - 2000	Urban	Jordanian	No	Irbid	Yes	Infection	Multiple sexual partners, Infection with HPV, Smoking	No symptoms, Bleeding per vagina, Discharge per vagina, Swelling of cervix, Post coital bleeding (spotting or bleeding unrelated to menstruation that occurs during or after sexual intercourse)	Don't know	Don't know	Yes	Yes	Don't know	No	Sexual	PCR (Polymerase chain reaction)	Plantar warts	Cervical carcinoma	Yes	0-10 Years	Yes	Don't know	Don't know	One	Don't know	Yes	high cost	Medical school teachings
2020-02-05 16:52:17	Disagree
2020-02-06 11:31:19	Agree	Yes	Yarmouk University	Female	23	6th years	1500 - 2000	Urban	Non-Jordanian	No		Yes	Infection	Multiple sexual partners, Infection with HPV, Early age of first coitus, Contraception (Intrauterine device/oral contraceptives)	No symptoms, Bleeding per vagina, Discharge per vagina, Menstrual problems, Post coital bleeding (spotting or bleeding unrelated to menstruation that occurs during or after sexual intercourse)	5 Years	3Years	No	Yes	Yes	Yes	Sexual	Pap smear, PCR (Polymerase chain reaction), Biopsy	Genital warts	Cervical carcinoma	Don't know	11-29 Years	Yes	Yes	Don't know	Don't know	Don't know	Yes	Inadequate information	Medical school teachings
2020-02-06 15:20:28	Agree	Yes	Yarmouk University	Female	23	5th years	1500 - 2000	Urban	Jordanian	No	Irbid	No	Infection	Multiple sexual partners, Infection with HPV, Poor hygiene, Early age of first coitus, Smoking, Family history of the disease, Contraception (Intrauterine device/oral contraceptives)	No symptoms, Post coital bleeding (spotting or bleeding unrelated to menstruation that occurs during or after sexual intercourse), Anemia	Don't know	Don't know	Yes	Yes	Yes	Yes	Sexual	Pap smear, PCR (Polymerase chain reaction)	Genital warts	Cervical carcinoma	Don't know	11-29 Years	Yes	Yes	Don't know	Don't know	Don't know	Yes	high cost, Inadequate information	Social media
2020-02-07 15:20:43	Agree	Yes	Yarmouk University	Female	22	4th years	1001 - 1499	Urban	Jordanian	No	Irbid	Yes	Environmental	Multiple sexual partners, Infection with HPV, Smoking, Family history of the disease, Contraception (Intrauterine device/oral contraceptives)	Bleeding per vagina, Menstrual problems, Weight loss, Post coital bleeding (spotting or bleeding unrelated to menstruation that occurs during or after sexual intercourse), Anemia	5 Years	Don't know	No	Yes	Yes	Yes	Sexual	Don't know	Cervical carcinoma	Plantar warts	No	30-50 Years	Don't know	Don't know	Don't know	Don't know	Don't know	Yes	high cost	Internet
2020-02-26 20:26:47	Agree	Yes	Jordan University of Science and Technology	Male	24	6th years	Less than 500	Urban	Jordanian	No	Irbid	Yes	Infection	Multiple sexual partners, Infection with HPV, Poor hygiene, Early age of first coitus, Smoking	Bleeding per vagina, Weight loss, Swelling of cervix, Post coital bleeding (spotting or bleeding unrelated to menstruation that occurs during or after sexual intercourse)	3 Years	5 Years	No	Yes	Don't know	Yes	Sexual	Pap smear, PCR (Polymerase chain reaction), Biopsy	Genital warts	Cervical carcinoma	No	0-10 Years	Yes	Don't know	Don't know	Three	0.9	Yes	high cost	Medical school teachings
2020-02-26 20:29:57	Agree	Yes	Jordan University of Science and Technology	Male	23	6th years	1500 - 2000	Urban	Non-Jordanian	Yes		Yes	Infection	Multiple sexual partners, Infection with HPV, Poor hygiene, Early age of first coitus, Smoking, Family history of the disease	No symptoms, Bleeding per vagina, Menstrual problems, Weight loss, Post coital bleeding (spotting or bleeding unrelated to menstruation that occurs during or after sexual intercourse), Anemia	3 Years	Don't know	Yes	Yes	Yes	Yes	Sexual	PCR (Polymerase chain reaction)	Genital warts	Cervical carcinoma	Don't know	11-29 Years	Yes	Yes	No	Three	0.9	Yes	Inadequate information	Medical school teachings, Books
2020-02-26 20:33:05	Agree	Yes	Jordan University of Science and Technology	Female	23	5th years	1500 - 2000	Urban	Jordanian	No	Irbid	Yes	Genetic	Multiple sexual partners, Infection with HPV, Poor hygiene, Early age of first coitus, Smoking, Family history of the disease, Old age, Contraception (Intrauterine device/oral contraceptives), Nulliparity (Never married)	Bleeding per vagina, Discharge per vagina, Menstrual problems, Weight loss, Swelling of cervix, Post coital bleeding (spotting or bleeding unrelated to menstruation that occurs during or after sexual intercourse), Anemia	Don't know	2 Years	Don't know	Don't know	Don't know	Yes	Sexual	Pap smear, PCR (Polymerase chain reaction)	Genital warts	Cervical carcinoma	Don't know	11-29 Years	Don't know	Don't know	No	Don't know	Don't know	Yes	high cost, Worry about complications, Inadequate information	Medical school teachings, Books
2020-02-26 20:33:40	Agree	Yes	Jordan University of Science and Technology	Male	24	5th years	More than 2000	Urban	Non-Jordanian	No		No	Infection	Infection with HPV, Early age of first coitus, Family history of the disease	Lower abdominal pain, Bleeding per vagina, Discharge per vagina, Menstrual problems, Post coital bleeding (spotting or bleeding unrelated to menstruation that occurs during or after sexual intercourse), Anemia	Don't know	Don't know	No	Yes	Yes	Yes	Oro-fecal	Blood test, Pap smear	Plantar warts	Cervical carcinoma	Yes	11-29 Years	Yes	Don't know	Yes	Don't know	0.9	Yes	Inadequate information	Medical school teachings, Social media
2020-02-26 20:38:09	Agree	Yes	Jordan University of Science and Technology	Male	23	6th years	More than 2000	Urban	Jordanian	No	Kuwait	No	Infection	Multiple sexual partners, Infection with HPV, Early age of first coitus, Smoking	No symptoms, Bleeding per vagina, Post coital bleeding (spotting or bleeding unrelated to menstruation that occurs during or after sexual intercourse)	3 Years	2 Years	No	Yes	Yes	Yes	Sexual	PCR (Polymerase chain reaction)	Genital warts	Cervical carcinoma	Don't know	11-29 Years	Yes	No	Yes	Three	0.9	Yes	high cost, Inadequate information	Medical school teachings
2020-02-26 20:39:44	Agree	Yes	Jordan University of Science and Technology	Male	22	5th years	1001 - 1499	Urban	Jordanian	No	Irbid	Yes	Genetic	Multiple sexual partners, Infection with HPV, Poor hygiene, Smoking, Family history of the disease, Old age	Bleeding per vagina	2 Years	2 Years	Yes	Yes	Yes	Yes	Environmental	Biopsy	Don't know	Don't know	No	0-10 Years	Don't know	Don't know	Don't know	Don't know	Don't know	Don't know	Worry about efficacy of vaccine	Medical school teachings
2020-02-26 20:41:03	Agree	Yes	Jordan University of Science and Technology	Female	23	5th years	501- 1000	Rural	Jordanian	No	Amman	No	Infection	Multiple sexual partners, Infection with HPV, Early age of first coitus	No symptoms, Lower abdominal pain, Bleeding per vagina, Post coital bleeding (spotting or bleeding unrelated to menstruation that occurs during or after sexual intercourse), Anemia	3 Years	Don't know	No	Yes	Yes	Yes	Sexual	Pap smear, Biopsy	Genital warts	Cervical carcinoma	Don't know	30-50 Years	Yes	Yes	Don't know	Don't know	0.9	No	high cost	Medical school teachings
2020-02-26 21:16:38	Agree	Yes	Jordan University of Science and Technology	Male	22	5th years	More than 2000	Urban	Jordanian	No	Irbid	Yes	Infection	Multiple sexual partners, Infection with HPV, Poor hygiene, Smoking, Family history of the disease, Old age	Bleeding per vagina, Menstrual problems, Weight loss, Post coital bleeding (spotting or bleeding unrelated to menstruation that occurs during or after sexual intercourse), Anemia	2 Years	3Years	No	Yes	Don't know	Yes	Sexual	Pap smear, PCR (Polymerase chain reaction)	Genital warts	Cervical carcinoma	Don't know	11-29 Years	Don't know	Don't know	Don't know	Don't know	Don't know	Yes	Inadequate information	Medical school teachings
2020-02-26 21:17:12	Agree	Yes	Jordan University of Science and Technology	Male	23	5th years	More than 2000	Urban	Non-Jordanian	Yes		Yes	Infection	Multiple sexual partners, Infection with HPV, Early age of first coitus, Smoking, Family history of the disease	Discharge per vagina, Weight loss, Post coital bleeding (spotting or bleeding unrelated to menstruation that occurs during or after sexual intercourse)	3 Years	Don't know	No	Yes	Don't know	Don't know	Don't know	Pap smear, PCR (Polymerase chain reaction), Biopsy	Plantar warts	Genital warts	Yes	11-29 Years	Yes	Don't know	No	Don't know	0.9	No	Inadequate information	Medical school teachings, Books, Internet
2020-02-26 21:46:12	Agree	Yes	University of Jordan	Female	23	5th years	1500 - 2000	Urban	Non-Jordanian	No		Yes	Infection	Multiple sexual partners, Infection with HPV	Bleeding per vagina, Discharge per vagina, Weight loss, Post coital bleeding (spotting or bleeding unrelated to menstruation that occurs during or after sexual intercourse)	3 Years	2 Years	Yes	Yes	Yes	Yes	Sexual	Pap smear	Genital warts	Cervical carcinoma	No	11-29 Years	Yes	No	No	Two	1	Yes	Worry about complications	Medical school teachings
2020-02-26 23:50:14	Agree	Yes	Jordan University of Science and Technology	Male	22	5th years	More than 2000	Urban	Non-Jordanian	No		Yes	Genetic	Infection with HPV, Smoking, Family history of the disease, Old age, Nulliparity (Never married)	Lower abdominal pain, Bleeding per vagina, Menstrual problems, Weight loss, Swelling of cervix, Post coital bleeding (spotting or bleeding unrelated to menstruation that occurs during or after sexual intercourse), Anemia	Don't know	Don't know	Don't know	Don't know	Don't know	Yes	Sexual	Pap smear, PCR (Polymerase chain reaction)	Genital warts	Plantar warts	No	11-29 Years	Yes	No	No	Don't know	Don't know	No	high cost	Medical school teachings
2020-02-27 10:35:13	Agree	Yes	Jordan University of Science and Technology	Female	25	6th years	501- 1000	Urban	Jordanian	No	Irbid	Yes	Infection	Multiple sexual partners, Infection with HPV, Poor hygiene, Early age of first coitus, Smoking, Old age	No symptoms, Lower abdominal pain, Bleeding per vagina, Discharge per vagina, Menstrual problems, Weight loss, Post coital bleeding (spotting or bleeding unrelated to menstruation that occurs during or after sexual intercourse)	3 Years	3Years	No	Yes	Yes	Yes	Sexual	Pap smear, Biopsy	Genital warts	Cervical carcinoma	Yes	30-50 Years	Don't know	Yes	No	Three	0.7	Yes	high cost, Worry about complications	Medical school teachings
2020-03-06 18:06:51	Agree	Yes	Yarmouk University	Female	24	6th years	501- 1000	Urban	Jordanian	No	Amman	No	Infection	Multiple sexual partners, Infection with HPV, Smoking	Lower abdominal pain, Bleeding per vagina, Discharge per vagina, Menstrual problems, Weight loss, Swelling of cervix, Post coital bleeding (spotting or bleeding unrelated to menstruation that occurs during or after sexual intercourse), Anemia	3 Years	5 Years	No	Yes	Yes	Yes	Sexual	Pap smear, PCR (Polymerase chain reaction), Biopsy	Plantar warts	Cervical carcinoma	No	11-29 Years	Yes	Yes	Yes	Three	0.9	Yes	Inadequate information	Medical school teachings
2020-03-06 22:36:50	Agree	Yes	Yarmouk University	Male	24	6th years	1500 - 2000	Urban	Jordanian	No	Irbid	No	Infection	Multiple sexual partners, Infection with HPV, Smoking, Family history of the disease	Lower abdominal pain, Bleeding per vagina, Discharge per vagina, Post coital bleeding (spotting or bleeding unrelated to menstruation that occurs during or after sexual intercourse)	Don't know	3Years	No	Yes	Yes	Yes	Sexual	Pap smear	Genital warts	Cervical carcinoma	Don't know	11-29 Years	Don't know	Yes	Don't know	Don't know	0.7	Yes	Inadequate information	Medical school teachings, Books, Internet
2020-03-06 22:38:33	Agree	Yes	Yarmouk University	Female	23	6th years	501- 1000	Rural	Jordanian	No	Irbid	Yes	Infection	Infection with HPV	Swelling of cervix	3 Years	5 Years	No	No	Yes	Yes	Sexual	Pap smear	Plantar warts	Genital warts	Yes	11-29 Years	Yes	No	No	Don't know	0.7	Yes	high cost, Worry about complications	Medical school teachings
2020-03-06 22:42:24	Agree	Yes	Yarmouk University	Male	23	6th years	More than 2000	Urban	Jordanian	No	Irbid	No	Infection	Multiple sexual partners, Infection with HPV, Poor hygiene, Smoking, Family history of the disease	Bleeding per vagina, Discharge per vagina, Menstrual problems, Itching, Weight loss, Swelling of cervix, Post coital bleeding (spotting or bleeding unrelated to menstruation that occurs during or after sexual intercourse)	3 Years	2 Years	No	Yes	Yes	Yes	Sexual	Pap smear, Biopsy	Plantar warts	Genital warts	Don't know	11-29 Years	No	Yes	Don't know	Three	Don't know	Yes	high cost, Worry about complications	Medical school teachings
2020-03-06 22:42:32	Agree	Yes	Yarmouk University	Male	22	6th years	More than 2000	Rural	Jordanian	No	Irbid	Yes	Infection	Infection with HPV	Lower abdominal pain, Bleeding per vagina, Discharge per vagina	3 Years	2 Years	Don't know	Don't know	Don't know	Yes	Sexual	Don't know	Genital warts	Cervical carcinoma	Don't know	11-29 Years	Don't know	Don't know	Don't know	Don't know	Don't know	Yes	high cost, Worry about complications, Worry about efficacy of vaccine, Inadequate information	Medical school teachings, Books, Internet
2020-03-06 22:43:44	Agree	Yes	Yarmouk University	Male	24	6th years	501- 1000	Rural	Jordanian	No	Irbid	No	Infection	Multiple sexual partners, Infection with HPV, Poor hygiene, Smoking	Bleeding per vagina, Discharge per vagina, Weight loss, Post coital bleeding (spotting or bleeding unrelated to menstruation that occurs during or after sexual intercourse)	2 Years	5 Years	Yes	Yes	Don't know	Yes	Sexual	Pap smear, Biopsy	Plantar warts	Cervical carcinoma	Don't know	11-29 Years	Don't know	Don't know	Don't know	Two	1	Yes	Inadequate information	Medical school teachings
2020-03-06 22:43:56	Agree	Yes	Yarmouk University	Male	23	6th years	1500 - 2000	Urban	Jordanian	No	Irbid	Yes	Infection	Multiple sexual partners, Infection with HPV, Poor hygiene, Early age of first coitus, Smoking, Family history of the disease, Old age, Nulliparity (Never married)	No symptoms, Bleeding per vagina, Discharge per vagina, Menstrual problems, Itching, Swelling of cervix, Post coital bleeding (spotting or bleeding unrelated to menstruation that occurs during or after sexual intercourse)	2 Years	5 Years	Yes	Yes	Yes	Yes	Sexual	Pap smear, PCR (Polymerase chain reaction), Biopsy	Genital warts	Cervical carcinoma	Don't know	11-29 Years	Yes	Yes	Don't know	Four	0.9	Yes	high cost	Medical school teachings, Internet
2020-03-06 22:44:57	Agree	Yes	Yarmouk University	Male	24	6th years	1001 - 1499	Urban	Jordanian	No	Irbid	Yes	Infection	Multiple sexual partners, Infection with HPV, Poor hygiene, Early age of first coitus, Smoking, Family history of the disease	No symptoms, Bleeding per vagina, Discharge per vagina, Menstrual problems, Weight loss, Post coital bleeding (spotting or bleeding unrelated to menstruation that occurs during or after sexual intercourse), Anemia	2 Years	3Years	No	Yes	Don't know	Yes	Sexual	Pap smear, Biopsy	Genital warts	Cervical carcinoma	Don't know	11-29 Years	No	Yes	Don't know	Two	0.9	No	high cost, Worry about complications, Worry about efficacy of vaccine, Inadequate information	Medical school teachings
2020-03-06 22:47:27	Agree	Yes	Yarmouk University	Female	25	6th years	1001 - 1499	Rural	Jordanian	No	Amman	Yes	Infection	Multiple sexual partners, Infection with HPV, Poor hygiene, Smoking, Family history of the disease, Contraception (Intrauterine device/oral contraceptives)	Lower abdominal pain, Bleeding per vagina, Discharge per vagina, Itching, Swelling of cervix, Post coital bleeding (spotting or bleeding unrelated to menstruation that occurs during or after sexual intercourse)	5 Years	5 Years	No	Yes	Don't know	Yes	Sexual	Pap smear	Plantar warts	Genital warts	No	11-29 Years	Yes	Yes	No	Three	0.9	Yes	Worry about complications	Medical school teachings, Books
2020-03-06 22:51:05	Agree	Yes	Yarmouk University	Female	23	6th years	Less than 500	Rural	Jordanian	No	Irbid	Yes	Infection	Multiple sexual partners, Infection with HPV, Early age of first coitus, Smoking, Family history of the disease, Contraception (Intrauterine device/oral contraceptives)	No symptoms, Bleeding per vagina, Weight loss, Post coital bleeding (spotting or bleeding unrelated to menstruation that occurs during or after sexual intercourse)	3 Years	5 Years	No	Yes	Yes	Yes	Sexual	Blood test, Pap smear, PCR (Polymerase chain reaction), Biopsy	Genital warts	Cervical carcinoma	Yes	0-10 Years	Yes	No	Don't know	Three	0.7	No	high cost, Worry about complications, Worry about efficacy of vaccine, Inadequate information	Medical school teachings, Newspapers, Internet
2020-03-06 22:55:21	Agree	Yes	Yarmouk University	Male	26	6th years	501- 1000	Urban	Jordanian	No	Irbid	Yes	Infection	Multiple sexual partners, Infection with HPV, Poor hygiene, Family history of the disease	Menstrual problems, Post coital bleeding (spotting or bleeding unrelated to menstruation that occurs during or after sexual intercourse)	5 Years	3Years	Yes	Yes	Yes	Yes	Sexual	Pap smear	Genital warts	Cervical carcinoma	Don't know	11-29 Years	Yes	No	No	Three	0.7	Yes	high cost	Medical school teachings
2020-03-06 23:00:21	Agree	Yes	Yarmouk University	Male	23	6th years	1001 - 1499	Urban	Jordanian	No	Amman	Yes	Infection	Multiple sexual partners, Infection with HPV, Poor hygiene, Early age of first coitus, Smoking	Bleeding per vagina, Swelling of cervix, Post coital bleeding (spotting or bleeding unrelated to menstruation that occurs during or after sexual intercourse)	3 Years	5 Years	No	Yes	Don't know	Yes	Sexual	Blood test, Pap smear, Biopsy	Genital warts	Cervical carcinoma	Don't know	11-29 Years	Yes	Yes	Don't know	Don't know	0.9	Yes	high cost, Inadequate information	Medical school teachings
2020-03-06 23:04:47	Agree	Yes	Yarmouk University	Female	23	6th years	1001 - 1499	Rural	Jordanian	No	Irbid	Yes	Infection	Multiple sexual partners, Infection with HPV, Early age of first coitus, Smoking	No symptoms, Lower abdominal pain, Bleeding per vagina, Discharge per vagina, Weight loss, Swelling of cervix, Post coital bleeding (spotting or bleeding unrelated to menstruation that occurs during or after sexual intercourse), Anemia	2 Years	3Years	Don't know	Yes	Yes	Yes	Sexual	Pap smear	Genital warts	Cervical carcinoma	No	11-29 Years	Don't know	Don't know	Don't know	Don't know	Don't know	Don't know	Inadequate information	Medical school teachings
2020-03-06 23:05:24	Agree	Yes	Yarmouk University	Female	23	6th years	1500 - 2000	Urban	Jordanian	No	Irbid	No	Infection	Multiple sexual partners, Infection with HPV, Smoking, Family history of the disease	Bleeding per vagina, Discharge per vagina, Menstrual problems, Post coital bleeding (spotting or bleeding unrelated to menstruation that occurs during or after sexual intercourse), Anemia	4 Years	Don't know	No	Yes	Yes	Yes	Sexual	Pap smear, Biopsy	Cervical carcinoma	Cervical carcinoma	Yes	11-29 Years	Yes	No	No	Two	0.7	No	Inadequate information	Medical school teachings
2020-03-06 23:06:13	Agree	Yes	Yarmouk University	Female	25	6th years	1001 - 1499	Urban	Jordanian	No	Amman	Yes	Infection	Multiple sexual partners, Infection with HPV, Family history of the disease	Lower abdominal pain, Bleeding per vagina, Discharge per vagina, Menstrual problems, Weight loss, Post coital bleeding (spotting or bleeding unrelated to menstruation that occurs during or after sexual intercourse), Anemia	3 Years	5 Years	Yes	Yes	Yes	Yes	Sexual	Pap smear	Genital warts	Cervical carcinoma	No	11-29 Years	Yes	Yes	Yes	Three	Don't know	Yes	high cost, Worry about efficacy of vaccine	Medical school teachings, Books, Internet
2020-03-06 23:07:17	Agree	Yes	Yarmouk University	Female	23	6th years	501- 1000	Urban	Jordanian	No	Irbid	No	Infection	Multiple sexual partners, Infection with HPV, Poor hygiene, Family history of the disease, Old age	Bleeding per vagina, Menstrual problems, Weight loss, Swelling of cervix, Post coital bleeding (spotting or bleeding unrelated to menstruation that occurs during or after sexual intercourse), Anemia	Don't know	Don't know	No	Yes	Yes	Yes	Sexual	Pap smear	Genital warts	Cervical carcinoma	No	11-29 Years	Don't know	Don't know	Yes	Two	Don't know	Yes	high cost, Inadequate information	Medical school teachings
2020-03-06 23:10:56	Agree	Yes	Yarmouk University	Female	23	6th years	1500 - 2000	Urban	Jordanian	No	Irbid	Yes	Infection	Multiple sexual partners, Infection with HPV, Smoking, Family history of the disease	No symptoms, Lower abdominal pain, Bleeding per vagina, Post coital bleeding (spotting or bleeding unrelated to menstruation that occurs during or after sexual intercourse)	2 Years	2 Years	Yes	Yes	Don't know	Don't know	Environmental	Pap smear	Genital warts	Cervical carcinoma	Don't know	11-29 Years	Yes	Don't know	Don't know	One	0.9	Yes	high cost	Medical school teachings, Internet
2020-03-06 23:13:33	Agree	Yes	Yarmouk University	Female	25	6th years	Less than 500	Rural	Jordanian	No	Amman	Yes	Infection	Multiple sexual partners, Infection with HPV, Smoking, Contraception (Intrauterine device/oral contraceptives)	No symptoms, Lower abdominal pain, Bleeding per vagina, Post coital bleeding (spotting or bleeding unrelated to menstruation that occurs during or after sexual intercourse)	3 Years	5 Years	Don't know	Yes	Yes	Yes	Sexual	Don't know	Genital warts	Cervical carcinoma	No	11-29 Years	Yes	Don't know	Yes	Two	Don't know	Yes	Worry about complications, Inadequate information	Medical school teachings
2020-03-06 23:19:47	Agree	Yes	Yarmouk University	Male	23	6th years	501- 1000	Urban	Jordanian	No	Jarash	Yes	Infection	Multiple sexual partners, Infection with HPV, Poor hygiene, Early age of first coitus, Smoking, Family history of the disease, Contraception (Intrauterine device/oral contraceptives), Nulliparity (Never married)	Lower abdominal pain, Discharge per vagina, Menstrual problems, Itching, Weight loss, Post coital bleeding (spotting or bleeding unrelated to menstruation that occurs during or after sexual intercourse)	5 Years	2 Years	Yes	Yes	Don't know	Yes	Sexual	Blood test, Pap smear	Plantar warts	Genital warts	Yes	0-10 Years	Don't know	No	Don't know	Two	0.9	Yes	high cost	Medical school teachings
2020-03-06 23:21:29	Agree	Yes	Yarmouk University	Female	23	6th years	501- 1000	Rural	Jordanian	No	Irbid	Yes	Infection	Multiple sexual partners, Infection with HPV, Early age of first coitus, Smoking, Contraception (Intrauterine device/oral contraceptives), Nulliparity (Never married)	No symptoms, Lower abdominal pain, Discharge per vagina, Menstrual problems, Weight loss, Swelling of cervix, Post coital bleeding (spotting or bleeding unrelated to menstruation that occurs during or after sexual intercourse)	3 Years	5 Years	No	Yes	Yes	Yes	Sexual	Pap smear, PCR (Polymerase chain reaction)	Genital warts	Cervical carcinoma	Yes	11-29 Years	Yes	Yes	Yes	Two	0.7	No	high cost	Medical school teachings
2020-03-06 23:21:48	Agree	Yes	Yarmouk University	Female	25	6th years	1500 - 2000	Rural	Jordanian	No	Irbid	Yes	Infection	Multiple sexual partners, Infection with HPV, Poor hygiene, Smoking, Family history of the disease	No symptoms, Bleeding per vagina, Discharge per vagina, Menstrual problems, Itching	3 Years	5 Years	No	Yes	Yes	Yes	Sexual	Pap smear	Genital warts	Cervical carcinoma	No	11-29 Years	No	No	No	Three	0.7	Yes	Inadequate information	Medical school teachings
2020-03-06 23:24:03	Agree	Yes	Yarmouk University	Female	24	6th years	1001 - 1499	Rural	Jordanian	No	Irbid	Yes	Infection	Multiple sexual partners, Infection with HPV, Early age of first coitus, Smoking, Family history of the disease, Old age, Contraception (Intrauterine device/oral contraceptives)	Bleeding per vagina, Menstrual problems, Weight loss, Post coital bleeding (spotting or bleeding unrelated to menstruation that occurs during or after sexual intercourse)	5 Years	2 Years	No	Yes	Yes	Yes	Sexual	Pap smear	Plantar warts	Cervical carcinoma	Don't know	30-50 Years	Don't know	Yes	No	Two	0.7	No	high cost	Medical school teachings
2020-03-06 23:30:31	Agree	Yes	Yarmouk University	Female	25	6th years	1001 - 1499	Rural	Jordanian	No	Irbid	No	Infection	Multiple sexual partners, Infection with HPV, Smoking, Family history of the disease	No symptoms, Bleeding per vagina, Discharge per vagina, Post coital bleeding (spotting or bleeding unrelated to menstruation that occurs during or after sexual intercourse)	5 Years	5 Years	No	Yes	Yes	Yes	Sexual	Pap smear	Genital warts	Cervical carcinoma	No	11-29 Years	Yes	Yes	Yes	Don't know	0.9	Yes	high cost, Inadequate information	Medical school teachings
2020-03-06 23:34:15	Agree	Yes	Yarmouk University	Female	23	5th years	Less than 500	Urban	Jordanian	No	Irbid	Yes	Infection	Multiple sexual partners, Infection with HPV, Poor hygiene, Smoking, Contraception (Intrauterine device/oral contraceptives)	No symptoms, Bleeding per vagina, Discharge per vagina, Menstrual problems, Itching, Swelling of cervix, Post coital bleeding (spotting or bleeding unrelated to menstruation that occurs during or after sexual intercourse)	3 Years	5 Years	Yes	Yes	Yes	Yes	Sexual	Pap smear	Genital warts	Don't know	Yes	30-50 Years	Don't know	Don't know	Yes	Don't know	0.7	Don't know	Worry about complications	Books
2020-03-06 23:34:19	Agree	Yes	Yarmouk University	Female	22	6th years	Less than 500	Urban	Jordanian	No	Irbid	Yes	Infection	Multiple sexual partners, Infection with HPV, Poor hygiene, Family history of the disease, Old age	No symptoms, Bleeding per vagina, Discharge per vagina, Menstrual problems, Weight loss, Swelling of cervix, Post coital bleeding (spotting or bleeding unrelated to menstruation that occurs during or after sexual intercourse), Anemia	3 Years	2 Years	No	Yes	Yes	Yes	Sexual	Pap smear, PCR (Polymerase chain reaction)	Genital warts	Cervical carcinoma	No	11-29 Years	Yes	No	Yes	Don't know	Don't know	No	Inadequate information	Medical school teachings, Newspapers, Friends, Books, Social media, Television
2020-03-06 23:36:50	Agree	Yes	Yarmouk University	Female	23	6th years	501- 1000	Urban	Jordanian	No	Amman	No	Genetic	Multiple sexual partners, Infection with HPV, Smoking, Family history of the disease	No symptoms, Bleeding per vagina, Itching, Weight loss, Swelling of cervix, Post coital bleeding (spotting or bleeding unrelated to menstruation that occurs during or after sexual intercourse)	5 Years	2 Years	Don't know	Yes	Yes	Yes	Sexual	Blood test, Pap smear, PCR (Polymerase chain reaction), Biopsy	Genital warts	Cervical carcinoma	Yes	11-29 Years	Yes	Don't know	Don't know	Two	0.7	Yes	Inadequate information	Medical school teachings, Friends
2020-03-06 23:39:28	Agree	Yes	Yarmouk University	Male	24	6th years	More than 2000	Urban	Jordanian	No	Irbid	No	Infection	Multiple sexual partners, Infection with HPV, Poor hygiene, Early age of first coitus, Smoking, Family history of the disease, Old age, Contraception (Intrauterine device/oral contraceptives), Nulliparity (Never married)	Lower abdominal pain, Bleeding per vagina, Fever, Discharge per vagina, Menstrual problems, Weight loss, Swelling of cervix, Post coital bleeding (spotting or bleeding unrelated to menstruation that occurs during or after sexual intercourse), Anemia	4 Years	2 Years	Yes	Yes	Yes	Yes	Sexual	Pap smear	Genital warts	Cervical carcinoma	Yes	11-29 Years	Yes	Yes	Yes	Two	0.7	Yes	Inadequate information	Medical school teachings, Books, Internet
2020-03-06 23:46:16	Agree	Yes	Yarmouk University	Female	24	6th years	501- 1000	Urban	Jordanian	No	Irbid	Yes	Infection	Multiple sexual partners, Infection with HPV, Early age of first coitus, Smoking, Contraception (Intrauterine device/oral contraceptives)	No symptoms, Bleeding per vagina, Discharge per vagina, Itching, Post coital bleeding (spotting or bleeding unrelated to menstruation that occurs during or after sexual intercourse)	Don't know	Don't know	Yes	Yes	Don't know	Yes	Sexual	Blood test, Pap smear	Genital warts	Cervical carcinoma	Yes	11-29 Years	Don't know	Yes	Don't know	Don't know	0.9	Yes	Worry about efficacy of vaccine	Medical school teachings, Books, Social media, Internet
2020-03-06 23:48:17	Agree	Yes	Yarmouk University	Female	23	6th years	501- 1000	Urban	Jordanian	No	Irbid	Yes	Infection	Multiple sexual partners, Infection with HPV	Discharge per vagina, Itching	2 Years	Don't know	No	Yes	Yes	Yes	Sexual	Pap smear, Biopsy	Genital warts	Cervical carcinoma	No	11-29 Years	No	Yes	Don't know	One	0.5	Yes	Inadequate information	Medical school teachings, Friends, Internet
2020-03-07 00:03:59	Agree	Yes	Yarmouk University	Female	24	6th years	501- 1000	Rural	Jordanian	No	Irbid	Yes	Infection	Multiple sexual partners, Infection with HPV, Smoking	Lower abdominal pain, Bleeding per vagina, Itching, Swelling of cervix, Post coital bleeding (spotting or bleeding unrelated to menstruation that occurs during or after sexual intercourse), Anemia	3 Years	5 Years	No	No	Yes	Yes	Sexual	Pap smear	Genital warts	Cervical carcinoma	Don't know	11-29 Years	Yes	Yes	No	Two	0.9	No	high cost, Inadequate information	Medical school teachings, Books, Internet
2020-03-07 00:15:08	Agree	Yes	Yarmouk University	Female	23	6th years	501- 1000	Urban	Jordanian	No	Irbid	Yes	Infection	Multiple sexual partners, Infection with HPV, Smoking, Family history of the disease, Nulliparity (Never married)	No symptoms, Bleeding per vagina, Discharge per vagina, Menstrual problems, Swelling of cervix, Post coital bleeding (spotting or bleeding unrelated to menstruation that occurs during or after sexual intercourse), Anemia	2 Years	5 Years	No	Yes	No	Yes	Sexual	Pap smear	Plantar warts	Genital warts	No	11-29 Years	Don't know	Don't know	No	Don't know	Don't know	No	Inadequate information	Medical school teachings, Friends
2020-03-07 00:26:27	Agree	Yes	Yarmouk University	Female	23	6th years	1500 - 2000	Urban	Jordanian	No	Irbid	Yes	Infection	Multiple sexual partners, Infection with HPV, Family history of the disease, Old age	Bleeding per vagina, Discharge per vagina, Weight loss, Post coital bleeding (spotting or bleeding unrelated to menstruation that occurs during or after sexual intercourse), Anemia	5 Years	2 Years	No	Yes	Yes	Yes	Sexual	Pap smear	Genital warts	Cervical carcinoma	Yes	11-29 Years	Don't know	Don't know	Yes	One	0.9	Yes	Inadequate information	Medical school teachings
2020-03-07 00:31:29	Agree	Yes	Yarmouk University	Female	23	6th years	1001 - 1499	Rural	Jordanian	No	Jarash	Yes	Infection	Multiple sexual partners, Infection with HPV, Smoking, Family history of the disease, Contraception (Intrauterine device/oral contraceptives)	No symptoms, Discharge per vagina, Post coital bleeding (spotting or bleeding unrelated to menstruation that occurs during or after sexual intercourse)	3 Years	2 Years	Yes	Yes	Yes	Yes	Sexual	Pap smear, PCR (Polymerase chain reaction), Biopsy	Genital warts	Cervical carcinoma	Don't know	11-29 Years	Yes	No	Yes	Three	Don't know	Yes	high cost	Medical school teachings, Books
2020-03-07 00:31:59	Agree	Yes	Yarmouk University	Female	24	6th years	1001 - 1499	Urban	Jordanian	No	Irbid	Yes	Infection	Multiple sexual partners, Infection with HPV, Early age of first coitus, Smoking, Family history of the disease	No symptoms, Lower abdominal pain, Bleeding per vagina, Discharge per vagina, Menstrual problems, Weight loss, Swelling of cervix, Post coital bleeding (spotting or bleeding unrelated to menstruation that occurs during or after sexual intercourse)	2 Years	Don't know	No	Yes	No	Don't know	Sexual	Pap smear	Plantar warts	Cervical carcinoma	Don't know	11-29 Years	Don't know	Yes	No	Don't know	0.9	Yes	high cost	Medical school teachings, Internet
2020-03-07 00:47:37	Agree	Yes	Yarmouk University	Male	24	6th years	More than 2000	Urban	Jordanian	No	Amman	Yes	Infection	Multiple sexual partners, Infection with HPV, Poor hygiene, Contraception (Intrauterine device/oral contraceptives)	No symptoms, Bleeding per vagina, Discharge per vagina, Weight loss, Swelling of cervix, Post coital bleeding (spotting or bleeding unrelated to menstruation that occurs during or after sexual intercourse), Anemia	3 Years	5 Years	No	Yes	Yes	Yes	Sexual	Pap smear, PCR (Polymerase chain reaction), Biopsy	Genital warts	Cervical carcinoma	Don't know	11-29 Years	Don't know	Don't know	Yes	Don't know	Don't know	Yes	Inadequate information	Medical school teachings
2020-03-07 02:25:02	Agree	Yes	Yarmouk University	Male	24	6th years	1500 - 2000	Rural	Jordanian	No	Irbid	Yes	Infection	Multiple sexual partners, Infection with HPV, Poor hygiene, Early age of first coitus, Smoking	No symptoms, Bleeding per vagina, Weight loss, Swelling of cervix, Post coital bleeding (spotting or bleeding unrelated to menstruation that occurs during or after sexual intercourse), Anemia	3 Years	5 Years	Yes	Yes	Yes	Yes	Sexual	Pap smear, PCR (Polymerase chain reaction), Biopsy	Genital warts	Cervical carcinoma	Don't know	0-10 Years	Yes	No	No	Don't know	0.9	Yes	high cost	Medical school teachings
2020-03-07 05:01:55	Agree	Yes	Yarmouk University	Female	25	6th years	1500 - 2000	Urban	Jordanian	No	Irbid	Yes	Infection	Multiple sexual partners, Infection with HPV, Poor hygiene, Early age of first coitus, Smoking, Family history of the disease, Old age	No symptoms, Lower abdominal pain, Bleeding per vagina, Fever, Discharge per vagina, Menstrual problems, Itching, Weight loss, Swelling of cervix, Post coital bleeding (spotting or bleeding unrelated to menstruation that occurs during or after sexual intercourse), Anemia	3 Years	5 Years	No	Yes	Yes	Yes	Sexual	Blood test, Pap smear, PCR (Polymerase chain reaction), Biopsy	Genital warts	Cervical carcinoma	Yes	11-29 Years	Yes	Yes	No	Two	0.9	Yes	high cost, Worry about complications, Worry about efficacy of vaccine, Inadequate information	Medical school teachings, Newspapers, Friends, Books, Social media, Internet, Television
2020-03-07 07:11:00	Agree	Yes	Yarmouk University	Female	24	6th years	1500 - 2000	Urban	Jordanian	No	Irbid	Yes	Infection	Infection with HPV, Smoking, Family history of the disease, Old age, Contraception (Intrauterine device/oral contraceptives)	Fever, Menstrual problems, Weight loss	2 Years	4 Years	No	Yes	Yes	Yes	Sexual	Pap smear	Genital warts	Cervical carcinoma	Yes	11-29 Years	Don't know	Yes	Don't know	One	0.9	Yes	Inadequate information	Medical school teachings
2020-03-07 07:12:36	Agree	Yes	Yarmouk University	Female	24	6th years	501- 1000	Rural	Jordanian	No	Irbid	No	Infection	Multiple sexual partners, Infection with HPV, Poor hygiene, Early age of first coitus, Smoking, Family history of the disease, Contraception (Intrauterine device/oral contraceptives)	No symptoms, Bleeding per vagina, Discharge per vagina, Swelling of cervix, Post coital bleeding (spotting or bleeding unrelated to menstruation that occurs during or after sexual intercourse)	2 Years	3Years	No	Yes	Yes	Yes	Sexual	Pap smear	Genital warts	Cervical carcinoma	No	11-29 Years	Yes	Yes	Yes	One	0.9	Yes	high cost	Medical school teachings
2020-03-07 07:43:51	Agree	Yes	Yarmouk University	Female	23	6th years	1001 - 1499	Urban	Jordanian	No	Irbid	No	Infection	Multiple sexual partners, Infection with HPV, Early age of first coitus, Smoking, Family history of the disease	Lower abdominal pain, Bleeding per vagina, Discharge per vagina, Menstrual problems, Itching, Weight loss, Swelling of cervix, Post coital bleeding (spotting or bleeding unrelated to menstruation that occurs during or after sexual intercourse)	3 Years	Don't know	No	Yes	Yes	Yes	Sexual	Blood test, Pap smear, PCR (Polymerase chain reaction), Biopsy	Plantar warts	Genital warts	Yes	11-29 Years	Don't know	No	Don't know	Don't know	Don't know	No	Inadequate information	Medical school teachings
2020-03-07 08:53:56	Agree	Yes	Yarmouk University	Female	23	6th years	1001 - 1499	Urban	Jordanian	No	Amman	Yes	Infection	Multiple sexual partners, Infection with HPV, Early age of first coitus, Smoking	Lower abdominal pain, Bleeding per vagina, Discharge per vagina, Itching, Post coital bleeding (spotting or bleeding unrelated to menstruation that occurs during or after sexual intercourse), Anemia	5 Years	2 Years	No	Yes	Yes	Yes	Sexual	Pap smear, PCR (Polymerase chain reaction), Biopsy	Genital warts	Cervical carcinoma	Yes	11-29 Years	Yes	No	Don't know	Two	0.7	Yes	Inadequate information	Medical school teachings
2020-03-07 09:04:09	Agree	Yes	Yarmouk University	Female	24	6th years	501- 1000	Urban	Jordanian	No	Irbid	No	Infection	Multiple sexual partners, Infection with HPV, Smoking	Bleeding per vagina, Discharge per vagina, Post coital bleeding (spotting or bleeding unrelated to menstruation that occurs during or after sexual intercourse), Anemia	3 Years	5 Years	No	Yes	Yes	Yes	Sexual	Pap smear, Biopsy	Genital warts	Cervical carcinoma	Yes	11-29 Years	No	Don't know	Yes	Three	0.7	Yes	high cost	Medical school teachings
2020-03-07 09:41:14	Agree	Yes	Yarmouk University	Female	24	6th years	More than 2000	Urban	Jordanian	No	Almafrq	Yes	Infection	Multiple sexual partners, Infection with HPV, Poor hygiene, Early age of first coitus, Smoking, Family history of the disease, Old age, Contraception (Intrauterine device/oral contraceptives), Nulliparity (Never married)	No symptoms, Bleeding per vagina, Fever, Weight loss, Post coital bleeding (spotting or bleeding unrelated to menstruation that occurs during or after sexual intercourse), Anemia	3 Years	5 Years	Don't know	Yes	Yes	Yes	Sexual	PCR (Polymerase chain reaction)	Genital warts	Cervical carcinoma	Don't know	11-29 Years	Yes	Don't know	Don't know	Don't know	0.9	Don't know	high cost	Medical school teachings
2020-03-07 10:21:02	Agree	Yes	Yarmouk University	Female	25	6th years	1500 - 2000	Rural	Jordanian	No	Irbid	No	Infection	Multiple sexual partners, Infection with HPV, Smoking, Contraception (Intrauterine device/oral contraceptives)	Bleeding per vagina, Discharge per vagina, Menstrual problems, Itching, Weight loss, Post coital bleeding (spotting or bleeding unrelated to menstruation that occurs during or after sexual intercourse)	5 Years	5 Years	No	Yes	Yes	Yes	Sexual	Pap smear	Genital warts	Cervical carcinoma	Yes	0-10 Years	Yes	No	Yes	Two	0.7	Yes	high cost	Medical school teachings, Books
2020-03-07 11:13:07	Agree	Yes	Yarmouk University	Female	23	6th years	501- 1000	Urban	Jordanian	No	Irbid	Yes	Infection	Multiple sexual partners, Infection with HPV, Family history of the disease, Contraception (Intrauterine device/oral contraceptives)	No symptoms, Bleeding per vagina, Swelling of cervix	2 Years	Don't know	No	Yes	Yes	Yes	Sexual	Pap smear, PCR (Polymerase chain reaction)	Genital warts	Cervical carcinoma	Yes	11-29 Years	Don't know	No	Don't know	Don't know	0.7	Yes	Inadequate information	Medical school teachings
2020-03-07 13:37:49	Agree	Yes	Yarmouk University	Female	23	6th years	More than 2000	Urban	Jordanian	No	Irbid	No	Infection	Multiple sexual partners, Infection with HPV, Smoking, Family history of the disease	Bleeding per vagina, Discharge per vagina, Weight loss, Swelling of cervix, Post coital bleeding (spotting or bleeding unrelated to menstruation that occurs during or after sexual intercourse)	4 Years	2 Years	No	Yes	Don't know	Yes	Sexual	Pap smear	Genital warts	Cervical carcinoma	Yes	11-29 Years	Yes	Yes	Yes	Three	1	No	high cost	Medical school teachings
2020-03-07 13:45:40	Agree	Yes	Yarmouk University	Female	24	6th years	501- 1000	Rural	Jordanian	No	Ajl'on	Yes	Infection	Multiple sexual partners, Infection with HPV, Poor hygiene, Smoking, Family history of the disease, Old age	No symptoms, Lower abdominal pain, Bleeding per vagina, Discharge per vagina, Post coital bleeding (spotting or bleeding unrelated to menstruation that occurs during or after sexual intercourse)	5 Years	2 Years	Yes	Yes	Yes	Yes	Sexual	Blood test, Pap smear	Genital warts	Cervical carcinoma	Don't know	11-29 Years	Don't know	Yes	Don't know	Two	0.9	Yes	high cost, Worry about efficacy of vaccine, Inadequate information	Medical school teachings, Books
2020-03-07 14:01:16	Agree	Yes	Yarmouk University	Male	24	6th years	More than 2000	Urban	Jordanian	Yes	Jarash	Yes	Infection	Multiple sexual partners, Infection with HPV, Poor hygiene, Early age of first coitus, Smoking, Family history of the disease, Old age, Contraception (Intrauterine device/oral contraceptives), Nulliparity (Never married)	No symptoms, Lower abdominal pain, Bleeding per vagina, Fever, Discharge per vagina, Menstrual problems, Itching, Weight loss, Swelling of cervix, Post coital bleeding (spotting or bleeding unrelated to menstruation that occurs during or after sexual intercourse), Anemia	3 Years	5 Years	No	Yes	Yes	Yes	Sexual	PCR (Polymerase chain reaction)	Genital warts	Cervical carcinoma	Yes	11-29 Years	Yes	Yes	No	Don't know	0.7	Yes	Inadequate information	Medical school teachings, Newspapers, Books
2020-03-07 14:09:00	Agree	Yes	Hashemite University	Male	25	6th years	1001 - 1499	Urban	Jordanian	No	Amman	No	Infection	Multiple sexual partners, Infection with HPV, Poor hygiene	Post coital bleeding (spotting or bleeding unrelated to menstruation that occurs during or after sexual intercourse)	2 Years	5 Years	No	Yes	Yes	Yes	Sexual	PCR (Polymerase chain reaction)	Genital warts	Cervical carcinoma	Yes	30-50 Years	Don't know	Don't know	No	Don't know	Don't know	No	high cost	Medical school teachings
2020-03-07 14:23:14	Agree	Yes	Hashemite University	Male	25	6th years	More than 2000	Urban	Jordanian	No	Amman	Yes	Infection	Multiple sexual partners, Infection with HPV, Poor hygiene, Early age of first coitus, Smoking, Old age	Bleeding per vagina, Discharge per vagina, Menstrual problems, Itching, Post coital bleeding (spotting or bleeding unrelated to menstruation that occurs during or after sexual intercourse)	Don't know	Don't know	No	Yes	Yes	Yes	Sexual	Pap smear, Biopsy	Don't know	Cervical carcinoma	Don't know	11-29 Years	Yes	Don't know	Don't know	Don't know	Don't know	No	high cost, Inadequate information	Medical school teachings
2020-03-08 16:49:46	Agree	Yes	Yarmouk University	Female	23	6th years	501- 1000	Urban	Jordanian	No	Amman	Yes	Infection	Multiple sexual partners, Infection with HPV, Poor hygiene, Smoking, Family history of the disease, Nulliparity (Never married)	No symptoms, Bleeding per vagina, Fever, Menstrual problems, Weight loss, Swelling of cervix, Post coital bleeding (spotting or bleeding unrelated to menstruation that occurs during or after sexual intercourse), Anemia	Don't know	2 Years	No	Yes	Yes	Yes	Sexual	Pap smear	Plantar warts	Cervical carcinoma	Yes	11-29 Years	Don't know	Don't know	Don't know	Three	Don't know	Yes	Inadequate information	Medical school teachings
2020-03-08 21:03:02	Agree	Yes	Jordan University of Science and Technology	Male	20	3th years	1500 - 2000	Rural	Jordanian	No	Ajl'on	Yes	Infection	Multiple sexual partners, Infection with HPV	Bleeding per vagina, Swelling of cervix, Anemia	5 Years	3Years	Yes	Yes	No	Yes	Sexual	Blood test, PCR (Polymerase chain reaction)	Genital warts	Cervical carcinoma	Don't know	11-29 Years	No	Yes	No	Don't know	0.7	Yes	high cost, Inadequate information	Medical school teachings
2020-03-08 21:13:43	Agree	Yes	Jordan University of Science and Technology	Male	20	3th years	Less than 500	Rural	Jordanian	No	Irbid	Yes	Infection	Infection with HPV	Discharge per vagina, Menstrual problems, Itching, Swelling of cervix	Don't know	Don't know	Don't know	Yes	Don't know	Yes	Sexual	Biopsy	Cervical carcinoma	Genital warts	Don't know	11-29 Years	Don't know	Don't know	Don't know	Don't know	0.7	Don't know	Inadequate information	Books, Internet
2020-03-08 21:15:28	Agree	Yes	Jordan University of Science and Technology	Male	20	3th years	501- 1000	Urban	Jordanian	No	Ajl'on	Yes	Genetic	Multiple sexual partners, Infection with HPV, Smoking, Family history of the disease, Old age, Contraception (Intrauterine device/oral contraceptives)	Discharge per vagina, Menstrual problems, Swelling of cervix	2 Years	5 Years	No	Yes	No	Yes	Sexual	PCR (Polymerase chain reaction)	Cervical carcinoma	Plantar warts	Yes	30-50 Years	Yes	Yes	Yes	Don't know	0.5	Yes	Worry about efficacy of vaccine	Social media
2020-03-08 21:17:16	Agree	Yes	Jordan University of Science and Technology	Male	21	3th years	501- 1000	Rural	Jordanian	No	Irbid	Yes	Genetic	Infection with HPV, Poor hygiene, Smoking, Family history of the disease, Old age	Lower abdominal pain, Discharge per vagina, Menstrual problems, Weight loss, Swelling of cervix, Anemia	Don't know	Don't know	No	No	Yes	Don't know	Sexual	PCR (Polymerase chain reaction)	Plantar warts	Cervical carcinoma	Don't know	0-10 Years	Yes	Yes	Yes	Don't know	Don't know	Yes	high cost, Inadequate information	Medical school teachings, Books, Social media, Internet
2020-03-08 21:18:01	Agree	Yes	Hashemite University	Male	21	3th years	More than 2000	Urban	Jordanian	No	Azarqa	Yes	Infection	Multiple sexual partners, Infection with HPV, Early age of first coitus	Bleeding per vagina, Menstrual problems, Weight loss, Swelling of cervix, Post coital bleeding (spotting or bleeding unrelated to menstruation that occurs during or after sexual intercourse)	Don't know	Don't know	No	Yes	Yes	Yes	Sexual	Blood test, Pap smear, PCR (Polymerase chain reaction), Biopsy	Genital warts	Cervical carcinoma	Yes	11-29 Years	Yes	Yes	No	Don't know	0.9	Yes	high cost	Medical school teachings, Books, Internet
2020-03-08 21:20:18	Agree	Yes	Jordan University of Science and Technology	Male	20	3th years	1001 - 1499	Rural	Jordanian	No	Ajl'on	Yes	Infection	Infection with HPV, Smoking, Family history of the disease, Old age	Lower abdominal pain, Fever, Menstrual problems, Itching, Swelling of cervix, Post coital bleeding (spotting or bleeding unrelated to menstruation that occurs during or after sexual intercourse), Anemia	5 Years	2 Years	Don't know	Yes	Yes	Yes	Sexual	Blood test, Biopsy	Don't know	Don't know	Yes	0-10 Years	Yes	Yes	No	Two	0.9	Yes	high cost, Worry about complications, Worry about efficacy of vaccine	Medical school teachings, Books, Social media
2020-03-08 21:41:42	Agree	Yes	Jordan University of Science and Technology	Female	20	4th years	1500 - 2000	Urban	Jordanian	No	Irbid	No	Infection	Infection with HPV	Lower abdominal pain, Bleeding per vagina, Discharge per vagina, Menstrual problems, Weight loss	Don't know	Don't know	No	Yes	Yes	Yes	Sexual	Don't know	Don't know	Cervical carcinoma	Don't know	11-29 Years	Yes	Don't know	Yes	Don't know	Don't know	Yes	Worry about complications	Social media
2020-03-08 21:44:38	Agree	Yes	Jordan University of Science and Technology	Male	21	3th years	1500 - 2000	Rural	Jordanian	No	Irbid	Yes	Infection	Multiple sexual partners, Infection with HPV, Poor hygiene, Family history of the disease, Contraception (Intrauterine device/oral contraceptives), Nulliparity (Never married)	Bleeding per vagina, Discharge per vagina, Menstrual problems, Swelling of cervix, Post coital bleeding (spotting or bleeding unrelated to menstruation that occurs during or after sexual intercourse)	4 Years	2 Years	Don't know	Yes	Yes	Yes	Sexual	Blood test	Don't know	Don't know	Don't know	11-29 Years	Don't know	Yes	No	Three	Don't know	Yes	Worry about complications, Worry about efficacy of vaccine	Medical school teachings, Internet
2020-03-08 21:44:56	Agree	Yes	Jordan University of Science and Technology	Male	20	3th years	1001 - 1499	Urban	Non-Jordanian	No		Yes	Infection	Multiple sexual partners, Infection with HPV, Old age	Lower abdominal pain, Menstrual problems, Swelling of cervix	3 Years	2 Years	No	Yes	Yes	Yes	Sexual	Blood test, Pap smear, PCR (Polymerase chain reaction)	Genital warts	Cervical carcinoma	Yes	11-29 Years	No	Don't know	Yes	Three	0.7	Yes	high cost, Worry about complications	Medical school teachings, Books
2020-03-08 21:46:25	Agree	Yes	Jordan University of Science and Technology	Female	20	3th years	More than 2000	Urban	Non-Jordanian	No		No	Infection	Multiple sexual partners, Infection with HPV, Family history of the disease	Lower abdominal pain, Bleeding per vagina, Discharge per vagina, Menstrual problems, Post coital bleeding (spotting or bleeding unrelated to menstruation that occurs during or after sexual intercourse), Anemia	Don't know	Don't know	No	Yes	Yes	Yes	Sexual	Don't know	Genital warts	Cervical carcinoma	Yes	11-29 Years	Don't know	Don't know	Don't know	Don't know	Don't know	Yes	Worry about complications	Medical school teachings
2020-03-08 21:47:30	Agree	Yes	Hashemite University	Female	21	3th years	Less than 500	Urban	Jordanian	No	Azarqa	Yes	Infection	Multiple sexual partners, Infection with HPV, Early age of first coitus, Family history of the disease, Contraception (Intrauterine device/oral contraceptives)	Lower abdominal pain, Bleeding per vagina, Menstrual problems, Swelling of cervix, Post coital bleeding (spotting or bleeding unrelated to menstruation that occurs during or after sexual intercourse), Anemia	5 Years	2 Years	No	Yes	Yes	Yes	Sexual	Pap smear, Biopsy	Genital warts	Cervical carcinoma	No	30-50 Years	Yes	Yes	Don't know	Don't know	0.7	Yes	Worry about complications, Inadequate information	Medical school teachings, Books, Internet
2020-03-08 21:47:36	Agree	Yes	Hashemite University	Female	21	3th years	1500 - 2000	Urban	Jordanian	No	Madaba	Yes	Infection	Infection with HPV	Bleeding per vagina, Weight loss, Swelling of cervix	3 Years	3Years	No	Yes	Yes	Yes	Sexual	Pap smear, PCR (Polymerase chain reaction), Biopsy	Genital warts	Cervical carcinoma	No	11-29 Years	Don't know	Don't know	Don't know	Don't know	Don't know	Yes	high cost	Medical school teachings
2020-03-08 21:48:53	Agree	Yes	Hashemite University	Male	21	3th years	501- 1000	Urban	Jordanian	No	Amman	Yes	Infection	Multiple sexual partners, Infection with HPV	No symptoms, Bleeding per vagina, Itching	2 Years	2 Years	No	Yes	No	Yes	Sexual	Pap smear, PCR (Polymerase chain reaction), Biopsy	Genital warts	Cervical carcinoma	Don't know	11-29 Years	Don't know	Don't know	Don't know	Don't know	0.9	Yes	Inadequate information	Internet
2020-03-08 21:50:40	Agree	Yes	Jordan University of Science and Technology	Male	22	3th years	More than 2000	Rural	Jordanian	Yes	Bayt yafa	Yes	Genetic	Infection with HPV, Poor hygiene, Smoking, Family history of the disease, Old age	Fever, Menstrual problems, Itching, Weight loss, Swelling of cervix, Post coital bleeding (spotting or bleeding unrelated to menstruation that occurs during or after sexual intercourse), Anemia	Don't know	Don't know	No	Yes	Yes	Yes	Blood	Blood test, Pap smear, PCR (Polymerase chain reaction)	Cervical carcinoma	Cervical carcinoma	Don't know	30-50 Years	Don't know	Don't know	Don't know	Three	Don't know	Don't know	Inadequate information	Friends, Social media, Internet
2020-03-08 21:51:35	Agree	Yes	Jordan University of Science and Technology	Female	21	3th years	More than 2000	Urban	Jordanian	No	Azarqa	Yes	Infection	Infection with HPV, Poor hygiene, Contraception (Intrauterine device/oral contraceptives)	Discharge per vagina, Menstrual problems, Itching	Don't know	Don't know	Don't know	Don't know	Yes	Yes	Sexual	Blood test, PCR (Polymerase chain reaction)	Plantar warts	Cervical carcinoma	No	11-29 Years	Don't know	Yes	Don't know	Don't know	Don't know	Yes	high cost, Worry about complications, Inadequate information	Medical school teachings, Internet
2020-03-08 21:51:36	Agree	Yes	Jordan University of Science and Technology	Male	20	3th years	More than 2000	Rural	Jordanian	No	Irbid	Yes	Genetic	Multiple sexual partners, Infection with HPV, Family history of the disease, Old age	Bleeding per vagina, Weight loss, Anemia	Don't know	Don't know	No	No	Don't know	Yes	Sexual	PCR (Polymerase chain reaction), Biopsy	Genital warts	Cervical carcinoma	Yes	11-29 Years	Yes	No	No	Don't know	Don't know	No	high cost	Medical school teachings, Internet
2020-03-08 21:56:01	Agree	Yes	Jordan University of Science and Technology	Female	20	3th years	More than 2000	Urban	Jordanian	No	Irbid	Yes	Infection	Multiple sexual partners, Infection with HPV, Contraception (Intrauterine device/oral contraceptives)	Lower abdominal pain, Bleeding per vagina, Menstrual problems, Post coital bleeding (spotting or bleeding unrelated to menstruation that occurs during or after sexual intercourse)	Don't know	Don't know	Don't know	Yes	Yes	Yes	Sexual	Blood test, PCR (Polymerase chain reaction)	Genital warts	Cervical carcinoma	Yes	11-29 Years	Don't know	No	No	Three	0.5	Yes	Inadequate information	Medical school teachings
2020-03-08 22:02:25	Agree	Yes	Jordan University of Science and Technology	Female	20	3th years	More than 2000	Urban	Jordanian	No	Amman	Yes	Infection	Multiple sexual partners, Infection with HPV, Poor hygiene, Family history of the disease	Bleeding per vagina, Discharge per vagina, Menstrual problems, Swelling of cervix, Post coital bleeding (spotting or bleeding unrelated to menstruation that occurs during or after sexual intercourse), Anemia	Don't know	Don't know	No	Yes	Don't know	Yes	Sexual	Pap smear, PCR (Polymerase chain reaction), Biopsy	Genital warts	Cervical carcinoma	Don't know	11-29 Years	Yes	Don't know	Don't know	Don't know	Don't know	Yes	Inadequate information	Social media, Internet
2020-03-08 22:14:02	Agree	Yes	Hashemite University	Male	21	3th years	501- 1000	Urban	Jordanian	No	Amman	Yes	Infection	Multiple sexual partners, Infection with HPV, Early age of first coitus	Bleeding per vagina, Post coital bleeding (spotting or bleeding unrelated to menstruation that occurs during or after sexual intercourse)	3 Years	3Years	No	Yes	Yes	Yes	Sexual	Pap smear	Genital warts	Cervical carcinoma	No	11-29 Years	Yes	Yes	Yes	Don't know	0.7	Yes	high cost, Inadequate information	Books
2020-03-08 22:14:07	Agree	Yes	Hashemite University	Female	20	3th years	Less than 500	Rural	Jordanian	No	Jarash	Yes	Infection	Infection with HPV	Bleeding per vagina, Menstrual problems, Post coital bleeding (spotting or bleeding unrelated to menstruation that occurs during or after sexual intercourse)	Don't know	Don't know	Yes	Yes	Don't know	Yes	Sexual	Pap smear, PCR (Polymerase chain reaction)	Genital warts	Cervical carcinoma	Yes	0-10 Years	Yes	No	Don't know	Don't know	0.7	Yes	high cost, Inadequate information	Medical school teachings, Books, Social media, Internet
2020-03-08 22:30:17	Agree	Yes	Hashemite University	Male	20	3th years	501- 1000	Rural	Jordanian	No	Ajl'on	Yes	Environmental	Multiple sexual partners, Infection with HPV, Poor hygiene, Early age of first coitus, Smoking, Family history of the disease, Old age, Contraception (Intrauterine device/oral contraceptives), Nulliparity (Never married)	No symptoms	Don't know	2 Years	Yes	Don't know	Yes	Yes	Sexual	Blood test, Pap smear, PCR (Polymerase chain reaction), Biopsy	Genital warts	Cervical carcinoma	Don't know	11-29 Years	Yes	Don't know	Don't know	One	0.7	Yes	Worry about complications, Inadequate information	Medical school teachings, Social media
2020-03-08 22:34:20	Agree	Yes	Hashemite University	Male	21	3th years	Less than 500	Urban	Jordanian	No	Amman	Yes	Infection	Multiple sexual partners, Infection with HPV, Family history of the disease	Bleeding per vagina, Menstrual problems	Don't know	Don't know	No	Yes	Yes	Yes	Sexual	Pap smear, PCR (Polymerase chain reaction)	Genital warts	Cervical carcinoma	Yes	11-29 Years	Don't know	Yes	Yes	Don't know	0.9	Yes	high cost, Inadequate information	Medical school teachings
2020-03-08 22:44:04	Agree	Yes	Hashemite University	Male	20	3th years	1500 - 2000	Urban	Jordanian	No	Amman	Yes	Environmental	Multiple sexual partners, Infection with HPV, Family history of the disease	Lower abdominal pain, Bleeding per vagina, Menstrual problems, Post coital bleeding (spotting or bleeding unrelated to menstruation that occurs during or after sexual intercourse)	Don't know	Don't know	No	Yes	Yes	Yes	Sexual	PCR (Polymerase chain reaction)	Genital warts	Cervical carcinoma	Yes	0-10 Years	Yes	No	Yes	Don't know	0.9	Yes	Worry about complications, Inadequate information	Medical school teachings, Newspapers, Books
2020-03-08 22:50:48	Agree	Yes	Jordan University of Science and Technology	Female	21	3th years	1500 - 2000	Urban	Jordanian	No	Madaba	No	Infection	Multiple sexual partners, Infection with HPV, Poor hygiene, Smoking, Family history of the disease, Contraception (Intrauterine device/oral contraceptives)	Bleeding per vagina, Discharge per vagina, Menstrual problems, Itching, Post coital bleeding (spotting or bleeding unrelated to menstruation that occurs during or after sexual intercourse)	Don't know	2 Years	No	Don't know	Yes	Yes	Sexual	Blood test, Pap smear	Don't know	Don't know	No	11-29 Years	No	Yes	No	Don't know	Don't know	Yes	high cost, Worry about complications, Worry about efficacy of vaccine, Inadequate information	Medical school teachings, Social media, Internet
2020-03-08 22:58:58	Agree	Yes	Hashemite University	Female	20	3th years	501- 1000	Urban	Jordanian	No	Amman	No	Infection	Multiple sexual partners, Infection with HPV, Poor hygiene	Bleeding per vagina, Itching, Swelling of cervix, Post coital bleeding (spotting or bleeding unrelated to menstruation that occurs during or after sexual intercourse), Anemia	Don't know	2 Years	No	Yes	Yes	Yes	Sexual	Pap smear, PCR (Polymerase chain reaction), Biopsy	Genital warts	Cervical carcinoma	No	0-10 Years	Yes	Don't know	No	Don't know	0.9	Yes	Worry about complications, Worry about efficacy of vaccine	Medical school teachings
2020-03-08 23:01:23	Agree	Yes	Jordan University of Science and Technology	Female	21	3th years	1001 - 1499	Rural	Jordanian	No	Irbid	Yes	Infection	Multiple sexual partners, Infection with HPV, Family history of the disease	Bleeding per vagina, Menstrual problems, Weight loss, Anemia	Don't know	Don't know	Don't know	Don't know	Don't know	Yes	Sexual	PCR (Polymerase chain reaction)	Plantar warts	Plantar warts	Don't know	11-29 Years	Don't know	Don't know	Don't know	Don't know	Don't know	Yes	Inadequate information	Medical school teachings, Books, Internet
2020-03-09 00:02:06	Agree	Yes	Hashemite University	Female	20	3th years	1001 - 1499	Urban	Jordanian	No	Azarqa	Yes	Infection	Multiple sexual partners, Infection with HPV, Family history of the disease	Lower abdominal pain, Bleeding per vagina, Discharge per vagina, Menstrual problems, Swelling of cervix, Post coital bleeding (spotting or bleeding unrelated to menstruation that occurs during or after sexual intercourse)	Don't know	2 Years	Yes	Yes	No	Yes	Sexual	Pap smear	Genital warts	Cervical carcinoma	Don't know	11-29 Years	Yes	Yes	Don't know	One	0.9	Yes	high cost, Inadequate information	Medical school teachings, Social media
2020-03-09 00:22:45	Agree	Yes	Jordan University of Science and Technology	Female	21	3th years	More than 2000	Urban	Jordanian	No	Amman	No	Infection	Multiple sexual partners, Infection with HPV, Poor hygiene, Early age of first coitus, Smoking, Family history of the disease, Old age, Contraception (Intrauterine device/oral contraceptives)	Lower abdominal pain, Bleeding per vagina, Discharge per vagina, Menstrual problems, Itching, Weight loss, Swelling of cervix, Post coital bleeding (spotting or bleeding unrelated to menstruation that occurs during or after sexual intercourse)	5 Years	2 Years	No	Yes	Yes	Yes	Sexual	Pap smear, PCR (Polymerase chain reaction)	Genital warts	Cervical carcinoma	Don't know	11-29 Years	Don't know	Yes	No	Don't know	0.7	No	Worry about complications, Worry about efficacy of vaccine	Medical school teachings, Books, Internet
2020-03-09 00:45:00	Agree	Yes	Hashemite University	Male	21	3th years	1001 - 1499	Urban	Jordanian	No	Azarqa	No	Infection	Multiple sexual partners, Infection with HPV, Early age of first coitus, Family history of the disease, Nulliparity (Never married)	Lower abdominal pain, Bleeding per vagina, Discharge per vagina, Menstrual problems, Itching, Swelling of cervix, Post coital bleeding (spotting or bleeding unrelated to menstruation that occurs during or after sexual intercourse)	Don't know	Don't know	No	No	Yes	Yes	Sexual	Pap smear, PCR (Polymerase chain reaction)	Genital warts	Cervical carcinoma	Don't know	11-29 Years	Don't know	Yes	Don't know	Don't know	Don't know	Yes	high cost, Inadequate information	Medical school teachings, Books
2020-03-09 07:52:03	Agree	Yes	Hashemite University	Female	21	3th years	501- 1000	Urban	Jordanian	No	Amman	No	Infection	Multiple sexual partners, Infection with HPV, Poor hygiene	Lower abdominal pain, Bleeding per vagina	2 Years	Don't know	No	Yes	Yes	Don't know	Sexual	Pap smear, PCR (Polymerase chain reaction)	Genital warts	Cervical carcinoma	Don't know	0-10 Years	Yes	Don't know	Don't know	Don't know	Don't know	Yes	high cost, Inadequate information	Medical school teachings
2020-03-09 08:43:07	Agree	Yes	Jordan University of Science and Technology	Male	23	3th years	1001 - 1499	Rural	Non-Jordanian	No		No	Infection	Multiple sexual partners, Infection with HPV, Smoking, Family history of the disease	Bleeding per vagina, Fever, Discharge per vagina, Itching, Swelling of cervix, Post coital bleeding (spotting or bleeding unrelated to menstruation that occurs during or after sexual intercourse)	Don't know	Don't know	No	Yes	Yes	Yes	Sexual	Blood test	Cervical carcinoma	Don't know	Don't know	11-29 Years	Don't know	Don't know	No	Don't know	Don't know	Yes	Worry about complications, Worry about efficacy of vaccine, Inadequate information	Medical school teachings, Books, Social media, Internet
2020-03-09 14:51:45	Agree	Yes	Hashemite University	Male	21	3th years	More than 2000	Urban	Jordanian	No	Amman	Yes	Infection	Multiple sexual partners, Infection with HPV, Early age of first coitus, Contraception (Intrauterine device/oral contraceptives)	Lower abdominal pain, Bleeding per vagina, Weight loss, Post coital bleeding (spotting or bleeding unrelated to menstruation that occurs during or after sexual intercourse)	Don't know	Don't know	Yes	Yes	Yes	Yes	Sexual	Pap smear	Genital warts	Cervical carcinoma	Yes	30-50 Years	Don't know	Don't know	Don't know	Don't know	0.9	Don't know	Inadequate information	Medical school teachings, Books, Social media
2020-03-09 15:01:35	Agree	Yes	Jordan University of Science and Technology	Female	20	3th years	1500 - 2000	Urban	Jordanian	No	Amman	No	Environmental	Multiple sexual partners, Infection with HPV, Smoking, Family history of the disease	Discharge per vagina, Weight loss, Post coital bleeding (spotting or bleeding unrelated to menstruation that occurs during or after sexual intercourse)	Don't know	Don't know	Don't know	Yes	Don't know	Yes	Sexual	Blood test, Pap smear	Plantar warts	Cervical carcinoma	Don't know	30-50 Years	Don't know	Don't know	No	Don't know	Don't know	Don't know	Worry about efficacy of vaccine, Inadequate information	Medical school teachings
2020-03-09 15:04:13	Agree	Yes	Jordan University of Science and Technology	Male	21	3th years	More than 2000	Urban	Jordanian	No	Amman	Yes	Infection	Infection with HPV, Smoking, Family history of the disease, Old age	Lower abdominal pain, Bleeding per vagina, Weight loss, Anemia	Don't know	2 Years	No	Yes	Don't know	Yes	Environmental	Pap smear	Genital warts	Cervical carcinoma	Don't know	0-10 Years	Don't know	Yes	Yes	One	0.9	Yes	Worry about complications, Worry about efficacy of vaccine	Medical school teachings, Friends
2020-03-09 15:55:50	Agree	Yes	Yarmouk University	Female	24	6th years	1001 - 1499	Rural	Jordanian	No	Jarash	Yes	Infection	Infection with HPV	No symptoms	5 Years	2 Years	No	Yes	Yes	Don't know	Sexual	PCR (Polymerase chain reaction)	Genital warts	Cervical carcinoma	Don't know	11-29 Years	Yes	Yes	Yes	Don't know	0.5	Yes	high cost	Medical school teachings
2020-03-09 16:50:04	Agree	Yes	Hashemite University	Female	20	3th years	1500 - 2000	Urban	Jordanian	No	Amman	Yes	Infection	Multiple sexual partners, Infection with HPV, Poor hygiene, Early age of first coitus, Smoking, Family history of the disease, Old age, Contraception (Intrauterine device/oral contraceptives), Nulliparity (Never married)	No symptoms, Lower abdominal pain, Bleeding per vagina, Discharge per vagina, Menstrual problems, Weight loss, Swelling of cervix, Post coital bleeding (spotting or bleeding unrelated to menstruation that occurs during or after sexual intercourse)	2 Years	2 Years	No	Yes	Yes	Yes	Sexual	Pap smear, PCR (Polymerase chain reaction), Biopsy	Genital warts	Cervical carcinoma	Yes	11-29 Years	Yes	Don't know	Yes	Two	0.9	Yes	high cost, Inadequate information	Medical school teachings, Social media, Internet
2020-03-09 21:51:46	Agree	Yes	Jordan University of Science and Technology	Male	20	3th years	1500 - 2000	Urban	Jordanian	No	Amman	Yes	Infection	Multiple sexual partners, Infection with HPV, Poor hygiene, Early age of first coitus	Bleeding per vagina, Post coital bleeding (spotting or bleeding unrelated to menstruation that occurs during or after sexual intercourse), Anemia	3 Years	5 Years	Don't know	Yes	Don't know	Yes	Sexual	Pap smear	Genital warts	Cervical carcinoma	Yes	0-10 Years	Yes	No	No	Don't know	Don't know	Yes	Inadequate information	Medical school teachings
2020-03-10 23:50:28	Agree	Yes	Hashemite University	Female	21	3th years	More than 2000	Rural	Non-Jordanian	Yes		Yes	Environmental	Family history of the disease, Contraception (Intrauterine device/oral contraceptives)	No symptoms	2 Years	2 Years	No	Don't know	Yes	No	Sexual	Biopsy	Genital warts	Cervical carcinoma	Don't know	11-29 Years	Yes	Yes	Yes	Three	0.5	Yes	Inadequate information	Medical school teachings, Books
2020-03-11 03:07:17	Agree	Yes	Hashemite University	Female	20	3th years	501- 1000	Urban	Jordanian	No	Azarqa	Yes	Infection	Multiple sexual partners, Infection with HPV, Poor hygiene, Early age of first coitus	Lower abdominal pain, Bleeding per vagina, Weight loss, Swelling of cervix, Post coital bleeding (spotting or bleeding unrelated to menstruation that occurs during or after sexual intercourse), Anemia	Don't know	Don't know	Yes	Yes	Yes	Yes	Sexual	Pap smear, PCR (Polymerase chain reaction), Biopsy	Genital warts	Cervical carcinoma	Yes	11-29 Years	Yes	No	Don't know	Three	0.9	No	Inadequate information	Internet
2020-03-20 11:46:07	Agree	Yes	University of Jordan	Male	23	6th years	More than 2000	Urban	Jordanian	No	Amman	Yes	Infection	Multiple sexual partners, Infection with HPV, Poor hygiene, Early age of first coitus, Smoking, Family history of the disease, Nulliparity (Never married)	No symptoms, Lower abdominal pain, Bleeding per vagina, Discharge per vagina, Menstrual problems, Itching, Weight loss, Swelling of cervix, Post coital bleeding (spotting or bleeding unrelated to menstruation that occurs during or after sexual intercourse)	3 Years	3Years	No	Yes	Yes	Yes	Sexual	Pap smear	Don't know	Don't know	Don't know	11-29 Years	Don't know	Don't know	Don't know	Don't know	Don't know	Don't know	high cost	Medical school teachings
2020-03-20 11:48:07	Agree	Yes	University of Jordan	Male	23	6th years	1001 - 1499	Urban	Jordanian	No	Azarqa	No	Infection	Multiple sexual partners, Infection with HPV, Poor hygiene, Early age of first coitus, Smoking, Family history of the disease, Old age	Lower abdominal pain, Bleeding per vagina, Discharge per vagina, Menstrual problems, Itching, Weight loss, Post coital bleeding (spotting or bleeding unrelated to menstruation that occurs during or after sexual intercourse)	5 Years	Don't know	No	Yes	No	Yes	Sexual	Pap smear	Don't know	Don't know	Don't know	11-29 Years	Yes	Yes	No	Don't know	0.9	Yes	high cost	Medical school teachings, Social media
2020-03-20 11:50:27	Agree	Yes	University of Jordan	Male	23	6th years	More than 2000	Urban	Jordanian	No	Amman	No	Infection	Multiple sexual partners, Infection with HPV, Poor hygiene, Early age of first coitus, Smoking, Family history of the disease, Contraception (Intrauterine device/oral contraceptives), Nulliparity (Never married)	No symptoms, Lower abdominal pain, Bleeding per vagina, Discharge per vagina, Menstrual problems, Itching, Weight loss, Swelling of cervix, Post coital bleeding (spotting or bleeding unrelated to menstruation that occurs during or after sexual intercourse), Anemia	3 Years	2 Years	No	Yes	Yes	Yes	Sexual	Pap smear, PCR (Polymerase chain reaction), Biopsy	Genital warts	Cervical carcinoma	Yes	0-10 Years	Yes	Yes	No	Three	0.7	Yes	Worry about complications, Worry about efficacy of vaccine	Medical school teachings
2020-03-20 11:51:13	Agree	Yes	University of Jordan	Female	23	6th years	More than 2000	Urban	Jordanian	Yes	Amman	Yes	Infection	Multiple sexual partners, Infection with HPV, Early age of first coitus, Smoking, Contraception (Intrauterine device/oral contraceptives)	Bleeding per vagina, Discharge per vagina, Menstrual problems, Post coital bleeding (spotting or bleeding unrelated to menstruation that occurs during or after sexual intercourse), Anemia	3 Years	5 Years	Yes	Yes	Don't know	Yes	Sexual	Pap smear, PCR (Polymerase chain reaction), Biopsy	Don't know	Don't know	Yes	11-29 Years	Yes	Don't know	Don't know	One	0.9	Yes	Inadequate information	Medical school teachings
2020-03-20 11:51:29	Agree	Yes	University of Jordan	Female	23	6th years	1001 - 1499	Urban	Jordanian	No	Amman	No	Infection	Multiple sexual partners, Infection with HPV, Early age of first coitus, Smoking, Family history of the disease	No symptoms, Bleeding per vagina, Discharge per vagina, Itching, Weight loss, Post coital bleeding (spotting or bleeding unrelated to menstruation that occurs during or after sexual intercourse), Anemia	3 Years	2 Years	No	Yes	Yes	Yes	Sexual	Pap smear, PCR (Polymerase chain reaction), Biopsy	Genital warts	Cervical carcinoma	Don't know	11-29 Years	Yes	Yes	Yes	Three	0.5	Yes	high cost, Worry about efficacy of vaccine	Medical school teachings
2020-03-20 11:54:35	Agree	Yes	University of Jordan	Male	23	6th years	More than 2000	Urban	Jordanian	No	Amman	Yes	Infection	Multiple sexual partners, Infection with HPV, Poor hygiene, Early age of first coitus, Smoking, Family history of the disease	Lower abdominal pain, Bleeding per vagina, Discharge per vagina, Menstrual problems, Itching, Post coital bleeding (spotting or bleeding unrelated to menstruation that occurs during or after sexual intercourse)	Don't know	Don't know	Don't know	Yes	Don't know	Yes	Sexual	Blood test, Pap smear	Genital warts	Cervical carcinoma	Yes	11-29 Years	Yes	Don't know	Don't know	Don't know	Don't know	Don't know	Inadequate information	Medical school teachings, Books, Internet
2020-03-20 11:54:44	Agree	Yes	University of Jordan	Female	24	5th years	1500 - 2000	Urban	Jordanian	No	Amman	No	Infection	Multiple sexual partners, Infection with HPV, Poor hygiene, Old age, Nulliparity (Never married)	Lower abdominal pain, Bleeding per vagina, Discharge per vagina, Weight loss, Anemia	5 Years	2 Years	No	No	No	Yes	Sexual	Pap smear	Genital warts	Cervical carcinoma	Yes	30-50 Years	Don't know	Yes	Yes	Three	0.7	Yes	Inadequate information	Medical school teachings
2020-03-20 11:55:00	Agree	Yes	University of Jordan	Female	23	5th years	More than 2000	Urban	Jordanian	No	Amman	No	Environmental	Multiple sexual partners, Infection with HPV, Smoking, Family history of the disease	No symptoms, Lower abdominal pain, Bleeding per vagina, Discharge per vagina, Menstrual problems, Swelling of cervix, Post coital bleeding (spotting or bleeding unrelated to menstruation that occurs during or after sexual intercourse), Anemia	Don't know	Don't know	No	No	No	No	Sexual	Don't know	Don't know	Don't know	Don't know	30-50 Years	Yes	Don't know	Don't know	Don't know	Don't know	Don't know	Inadequate information	Medical school teachings
2020-03-20 11:55:39	Agree	Yes	Jordan University of Science and Technology	Male	22	5th years	More than 2000	Urban	Jordanian	No	Amman	Yes	Infection	Multiple sexual partners, Infection with HPV, Early age of first coitus, Smoking, Contraception (Intrauterine device/oral contraceptives), Nulliparity (Never married)	No symptoms, Weight loss, Post coital bleeding (spotting or bleeding unrelated to menstruation that occurs during or after sexual intercourse)	3 Years	Don't know	Yes	Yes	Don't know	Yes	Sexual	Pap smear	Genital warts	Cervical carcinoma	No	11-29 Years	Yes	Don't know	Don't know	Don't know	Don't know	Yes	Inadequate information	Medical school teachings
2020-03-20 11:58:06	Agree	Yes	University of Jordan	Female	22	5th years	501- 1000	Urban	Jordanian	No	Amman	No	Infection	Multiple sexual partners, Infection with HPV, Early age of first coitus, Smoking, Nulliparity (Never married)	No symptoms, Bleeding per vagina, Discharge per vagina, Menstrual problems, Weight loss, Post coital bleeding (spotting or bleeding unrelated to menstruation that occurs during or after sexual intercourse)	2 Years	4 Years	No	Yes	Yes	Yes	Sexual	PCR (Polymerase chain reaction)	Genital warts	Cervical carcinoma	Don't know	11-29 Years	Yes	Don't know	Don't know	Don't know	Don't know	No	Inadequate information	Medical school teachings, Books, Social media, Internet
2020-03-20 11:58:32	Agree	Yes	University of Jordan	Female	25	6th years	1001 - 1499	Urban	Jordanian	No	Amman	Yes	Infection	Multiple sexual partners, Infection with HPV, Smoking, Family history of the disease, Old age, Nulliparity (Never married)	Lower abdominal pain, Bleeding per vagina, Discharge per vagina, Weight loss, Anemia	3 Years	5 Years	No	Yes	Yes	Yes	Sexual	Pap smear	Genital warts	Cervical carcinoma	Yes	11-29 Years	Yes	No	No	Three	0.7	Yes	Worry about complications, Worry about efficacy of vaccine	Internet
2020-03-20 12:00:23	Agree	Yes	University of Jordan	Male	22	5th years	1500 - 2000	Urban	Jordanian	No	Amman	Yes	Infection	Multiple sexual partners, Infection with HPV, Poor hygiene, Early age of first coitus, Smoking, Family history of the disease	No symptoms, Lower abdominal pain, Bleeding per vagina, Discharge per vagina, Itching, Weight loss, Post coital bleeding (spotting or bleeding unrelated to menstruation that occurs during or after sexual intercourse), Anemia	2 Years	5 Years	No	Yes	Yes	Yes	Sexual	PCR (Polymerase chain reaction)	Genital warts	Cervical carcinoma	Yes	11-29 Years	Yes	No	Yes	Three	0.9	Yes	high cost, Inadequate information	Medical school teachings
2020-03-20 12:02:13	Agree	Yes	University of Jordan	Male	24	6th years	More than 2000	Urban	Jordanian	No	Balqa	No	Infection	Multiple sexual partners, Infection with HPV, Poor hygiene, Early age of first coitus, Smoking, Family history of the disease, Old age, Contraception (Intrauterine device/oral contraceptives), Nulliparity (Never married)	No symptoms, Lower abdominal pain, Bleeding per vagina, Fever, Discharge per vagina, Menstrual problems, Itching, Weight loss, Swelling of cervix, Post coital bleeding (spotting or bleeding unrelated to menstruation that occurs during or after sexual intercourse), Anemia	3 Years	3Years	No	No	Yes	Yes	Sexual	Pap smear, PCR (Polymerase chain reaction)	Genital warts	Cervical carcinoma	No	11-29 Years	Yes	No	Yes	Don't know	Don't know	Yes	high cost, Worry about complications, Worry about efficacy of vaccine, Inadequate information	Medical school teachings, Newspapers, Friends, Books, Social media, Internet, Television
2020-03-20 12:02:27	Agree	Yes	University of Jordan	Male	23	5th years	More than 2000	Urban	Jordanian	No	Amman	Yes	Infection	Multiple sexual partners, Infection with HPV, Early age of first coitus, Family history of the disease, Contraception (Intrauterine device/oral contraceptives), Nulliparity (Never married)	Lower abdominal pain, Discharge per vagina, Menstrual problems, Weight loss, Post coital bleeding (spotting or bleeding unrelated to menstruation that occurs during or after sexual intercourse), Anemia	2 Years	5 Years	No	Yes	Don't know	Yes	Sexual	Pap smear, Biopsy	Don't know	Don't know	Don't know	11-29 Years	Yes	Yes	Don't know	Don't know	Don't know	No	Worry about complications, Inadequate information	Medical school teachings
2020-03-20 12:03:56	Agree	Yes	University of Jordan	Female	22	5th years	501- 1000	Urban	Jordanian	No	Amman	Yes	Infection	Multiple sexual partners, Infection with HPV, Early age of first coitus, Smoking, Family history of the disease, Old age, Contraception (Intrauterine device/oral contraceptives)	No symptoms, Lower abdominal pain, Bleeding per vagina, Discharge per vagina, Menstrual problems, Post coital bleeding (spotting or bleeding unrelated to menstruation that occurs during or after sexual intercourse), Anemia	3 Years	5 Years	No	Yes	Yes	Yes	Sexual	Pap smear, PCR (Polymerase chain reaction), Biopsy	Cervical carcinoma	Genital warts	Don't know	11-29 Years	Yes	Yes	Yes	Don't know	0.5	Yes	high cost, Inadequate information	Medical school teachings, Internet
2020-03-20 12:06:52	Agree	Yes	University of Jordan	Female	23	5th years	1500 - 2000	Urban	Jordanian	No	Amman	Yes	Infection	Multiple sexual partners, Infection with HPV, Smoking, Family history of the disease	No symptoms, Weight loss, Post coital bleeding (spotting or bleeding unrelated to menstruation that occurs during or after sexual intercourse)	2 Years	Don't know	Don't know	Yes	Don't know	Yes	Sexual	Pap smear, Biopsy	Genital warts	Cervical carcinoma	Don't know	11-29 Years	Yes	Don't know	No	Don't know	0.9	No	high cost	Medical school teachings, Books
2020-03-20 12:09:50	Agree	Yes	University of Jordan	Female	25	6th years	501- 1000	Urban	Jordanian	No	Amman	Yes	Infection	Multiple sexual partners, Infection with HPV	Bleeding per vagina, Discharge per vagina, Post coital bleeding (spotting or bleeding unrelated to menstruation that occurs during or after sexual intercourse)	2 Years	5 Years	Yes	Yes	Don't know	Yes	Sexual	Pap smear	Don't know	Don't know	Yes	11-29 Years	Don't know	Yes	Don't know	Don't know	0.9	Yes	high cost	Medical school teachings
2020-03-20 12:10:34	Agree	Yes	University of Jordan	Female	24	6th years	501- 1000	Urban	Jordanian	No	Amman	No	Infection	Multiple sexual partners, Infection with HPV, Poor hygiene, Early age of first coitus, Smoking, Family history of the disease	Post coital bleeding (spotting or bleeding unrelated to menstruation that occurs during or after sexual intercourse)	3 Years	3Years	Yes	Yes	Don't know	Yes	Sexual	Pap smear, PCR (Polymerase chain reaction)	Genital warts	Cervical carcinoma	Don't know	11-29 Years	Yes	No	No	Don't know	Don't know	Yes	high cost	Books, Internet
2020-03-20 12:14:41	Agree	Yes	University of Jordan	Female	23	6th years	More than 2000	Urban	Non-Jordanian	No		Yes	Infection	Multiple sexual partners, Infection with HPV, Early age of first coitus, Smoking, Contraception (Intrauterine device/oral contraceptives)	No symptoms, Bleeding per vagina, Post coital bleeding (spotting or bleeding unrelated to menstruation that occurs during or after sexual intercourse), Anemia	2 Years	5 Years	No	Yes	Yes	Yes	Sexual	Pap smear	Genital warts	Cervical carcinoma	Don't know	11-29 Years	Yes	No	No	One	Don't know	Yes	Inadequate information	Medical school teachings
2020-03-20 12:15:50	Agree	Yes	University of Jordan	Female	24	6th years	More than 2000	Urban	Jordanian	No	Amman	Yes	Infection	Multiple sexual partners, Infection with HPV, Poor hygiene, Early age of first coitus, Smoking, Family history of the disease, Old age, Contraception (Intrauterine device/oral contraceptives)	Lower abdominal pain, Bleeding per vagina, Discharge per vagina, Menstrual problems, Itching, Weight loss, Swelling of cervix, Post coital bleeding (spotting or bleeding unrelated to menstruation that occurs during or after sexual intercourse)	3 Years	5 Years	No	Yes	Yes	Yes	Sexual	Pap smear	Don't know	Don't know	Don't know	11-29 Years	Yes	Don't know	No	Two	Don't know	No	Inadequate information	Medical school teachings, Books
2020-03-20 12:17:41	Agree	Yes	University of Jordan	Female	24	6th years	More than 2000	Urban	Jordanian	No	Amman	No	Infection	Multiple sexual partners, Infection with HPV, Early age of first coitus, Smoking, Nulliparity (Never married)	No symptoms, Lower abdominal pain, Bleeding per vagina, Discharge per vagina, Menstrual problems, Weight loss, Swelling of cervix, Post coital bleeding (spotting or bleeding unrelated to menstruation that occurs during or after sexual intercourse), Anemia	5 Years	3Years	Yes	Yes	Yes	Yes	Sexual	Pap smear, PCR (Polymerase chain reaction), Biopsy	Genital warts	Cervical carcinoma	Yes	11-29 Years	Yes	Don't know	No	Three	0.9	Yes	high cost	Medical school teachings
2020-03-20 12:20:02	Agree	Yes	University of Jordan	Male	22	5th years	More than 2000	Urban	Jordanian	No	Amman	No	Infection	Multiple sexual partners, Infection with HPV, Poor hygiene, Early age of first coitus, Smoking, Family history of the disease, Old age	Lower abdominal pain, Bleeding per vagina, Discharge per vagina, Itching, Weight loss, Swelling of cervix, Post coital bleeding (spotting or bleeding unrelated to menstruation that occurs during or after sexual intercourse), Anemia	3 Years	2 Years	Yes	Yes	Yes	Yes	Sexual	Pap smear	Genital warts	Cervical carcinoma	Yes	30-50 Years	Yes	No	Don't know	Don't know	0.9	No	Inadequate information	Medical school teachings
2020-03-20 12:20:31	Agree	Yes	University of Jordan	Male	23	6th years	1500 - 2000	Urban	Non-Jordanian	No		No	Infection	Multiple sexual partners, Infection with HPV, Early age of first coitus, Nulliparity (Never married)	Bleeding per vagina, Discharge per vagina, Menstrual problems, Swelling of cervix, Post coital bleeding (spotting or bleeding unrelated to menstruation that occurs during or after sexual intercourse), Anemia	3 Years	2 Years	No	Yes	Yes	Yes	Sexual	Blood test, Pap smear, PCR (Polymerase chain reaction), Biopsy	Genital warts	Cervical carcinoma	Don't know	11-29 Years	Yes	No	Yes	Two	0.9	Yes	high cost, Inadequate information	Medical school teachings, Internet
2020-03-20 12:22:51	Agree	Yes	University of Jordan	Female	22	5th years	More than 2000	Urban	Jordanian	No	Amman	Yes	Infection	Multiple sexual partners, Infection with HPV, Poor hygiene, Early age of first coitus, Smoking, Family history of the disease	Bleeding per vagina, Discharge per vagina, Menstrual problems, Itching, Weight loss, Post coital bleeding (spotting or bleeding unrelated to menstruation that occurs during or after sexual intercourse), Anemia	2 Years	Don't know	Don't know	Don't know	Don't know	Yes	Sexual	Pap smear, PCR (Polymerase chain reaction), Biopsy	Don't know	Don't know	Don't know	11-29 Years	Don't know	Don't know	Don't know	Don't know	Don't know	Don't know	Inadequate information	Social media, Internet
2020-03-20 12:23:23	Agree	Yes	University of Jordan	Female	23	6th years	1500 - 2000	Urban	Jordanian	No	Azarqa	Yes	Infection	Multiple sexual partners, Infection with HPV, Poor hygiene, Early age of first coitus, Smoking, Family history of the disease, Old age, Contraception (Intrauterine device/oral contraceptives)	Lower abdominal pain, Bleeding per vagina, Fever, Discharge per vagina, Itching, Weight loss, Swelling of cervix, Post coital bleeding (spotting or bleeding unrelated to menstruation that occurs during or after sexual intercourse)	5 Years	2 Years	Yes	Yes	Yes	Yes	Sexual	Blood test, Pap smear, Biopsy	Genital warts	Cervical carcinoma	Yes	11-29 Years	Yes	No	Don't know	Three	0.7	Yes	Inadequate information	Medical school teachings, Books, Internet
2020-03-20 12:23:35	Agree	Yes	University of Jordan	Male	24	6th years	More than 2000	Urban	Jordanian	No	Amman	Yes	Infection	Multiple sexual partners, Infection with HPV, Early age of first coitus, Smoking, Contraception (Intrauterine device/oral contraceptives)	No symptoms, Bleeding per vagina, Discharge per vagina, Weight loss, Anemia	2 Years	3Years	No	Yes	Yes	Yes	Sexual	Pap smear, Biopsy	Genital warts	Cervical carcinoma	Don't know	11-29 Years	Yes	Don't know	Yes	Two	0.7	No	Inadequate information	Medical school teachings, Books
2020-03-20 12:23:54	Agree	Yes	University of Jordan	Female	22	5th years	1500 - 2000	Urban	Jordanian	No	Azarqa	Yes	Infection	Multiple sexual partners, Infection with HPV, Early age of first coitus, Smoking, Family history of the disease, Old age	No symptoms, Lower abdominal pain, Bleeding per vagina, Fever, Discharge per vagina, Menstrual problems, Itching, Weight loss, Swelling of cervix, Post coital bleeding (spotting or bleeding unrelated to menstruation that occurs during or after sexual intercourse), Anemia	2 Years	2 Years	No	Yes	Yes	Yes	Sexual	Pap smear, Biopsy	Genital warts	Cervical carcinoma	Yes	11-29 Years	Yes	No	Yes	One	0.9	Yes	Worry about complications	Medical school teachings
2020-03-20 12:24:18	Agree	Yes	University of Jordan	Female	24	6th years	More than 2000	Rural	Jordanian	No	Salt	Yes	Infection	Multiple sexual partners, Infection with HPV, Poor hygiene, Early age of first coitus, Smoking, Family history of the disease, Old age, Contraception (Intrauterine device/oral contraceptives), Nulliparity (Never married)	No symptoms, Bleeding per vagina, Discharge per vagina, Menstrual problems, Post coital bleeding (spotting or bleeding unrelated to menstruation that occurs during or after sexual intercourse)	Don't know	Don't know	Yes	Yes	Yes	Yes	Sexual	Blood test, Pap smear	Genital warts	Cervical carcinoma	No	11-29 Years	Yes	Don't know	Don't know	Three	Don't know	Yes	high cost	Medical school teachings, Internet
2020-03-20 12:24:25	Agree	Yes	University of Jordan	Female	23	5th years	1001 - 1499	Urban	Jordanian	No	Amman	Yes	Infection	Multiple sexual partners, Infection with HPV, Early age of first coitus, Smoking, Family history of the disease	Menstrual problems, Weight loss, Swelling of cervix, Post coital bleeding (spotting or bleeding unrelated to menstruation that occurs during or after sexual intercourse)	3 Years	Don't know	No	Yes	Yes	Don't know	Sexual	Pap smear, PCR (Polymerase chain reaction), Biopsy	Genital warts	Cervical carcinoma	Don't know	11-29 Years	Don't know	Yes	No	Don't know	Don't know	Yes	high cost, Worry about efficacy of vaccine	Medical school teachings, Books
2020-03-20 12:24:38	Agree	Yes	University of Jordan	Female	24	5th years	1500 - 2000	Urban	Non-Jordanian	No		No	Infection	Multiple sexual partners, Infection with HPV, Early age of first coitus, Smoking, Family history of the disease	Bleeding per vagina, Discharge per vagina, Post coital bleeding (spotting or bleeding unrelated to menstruation that occurs during or after sexual intercourse)	2 Years	3Years	Yes	Yes	Yes	Yes	Sexual	Pap smear	Genital warts	Cervical carcinoma	Yes	11-29 Years	Yes	Yes	Don't know	Don't know	1	Don't know	Worry about efficacy of vaccine, Inadequate information	Medical school teachings, Internet
2020-03-20 12:25:58	Agree	Yes	University of Jordan	Female	21	5th years	1001 - 1499	Urban	Jordanian	No	Amman	Yes	Genetic	Multiple sexual partners, Infection with HPV, Poor hygiene, Smoking, Family history of the disease, Contraception (Intrauterine device/oral contraceptives)	Lower abdominal pain, Bleeding per vagina, Menstrual problems, Weight loss, Post coital bleeding (spotting or bleeding unrelated to menstruation that occurs during or after sexual intercourse)	Don't know	Don't know	Don't know	Don't know	Don't know	Don't know	Don't know	Don't know	Don't know	Don't know	Don't know	0-10 Years	Don't know	Don't know	Don't know	Don't know	Don't know	Yes	high cost, Worry about complications, Inadequate information	Medical school teachings, Internet
2020-03-20 12:37:18	Agree	Yes	University of Jordan	Female	23	5th years	1001 - 1499	Urban	Jordanian	No	Amman	No	Infection	Multiple sexual partners, Infection with HPV, Early age of first coitus	Bleeding per vagina, Discharge per vagina, Menstrual problems, Post coital bleeding (spotting or bleeding unrelated to menstruation that occurs during or after sexual intercourse)	2 Years	3Years	No	Yes	Yes	Yes	Sexual	Pap smear, PCR (Polymerase chain reaction)	Genital warts	Cervical carcinoma	Don't know	11-29 Years	Yes	Don't know	Don't know	One	0.9	Yes	Inadequate information	Medical school teachings
2020-03-20 12:44:20	Agree	Yes	University of Jordan	Female	25	6th years	More than 2000	Urban	Jordanian	No	Amman	Yes	Infection	Multiple sexual partners, Infection with HPV, Early age of first coitus, Smoking	No symptoms, Bleeding per vagina, Discharge per vagina, Weight loss, Anemia	2 Years	5 Years	No	Yes	Yes	Yes	Sexual	Pap smear, PCR (Polymerase chain reaction), Biopsy	Genital warts	Cervical carcinoma	Yes	11-29 Years	Yes	Yes	Yes	One	0.9	Yes	Worry about complications, Worry about efficacy of vaccine	Medical school teachings, Friends
2020-03-20 12:47:43	Agree	Yes	University of Jordan	Male	23	6th years	1500 - 2000	Urban	Jordanian	No	Amman	No	Infection	Multiple sexual partners, Infection with HPV, Early age of first coitus, Smoking, Family history of the disease	Bleeding per vagina, Discharge per vagina, Itching, Weight loss, Swelling of cervix, Post coital bleeding (spotting or bleeding unrelated to menstruation that occurs during or after sexual intercourse)	2 Years	5 Years	No	Yes	Yes	Yes	Sexual	Pap smear, PCR (Polymerase chain reaction)	Genital warts	Cervical carcinoma	Don't know	11-29 Years	No	Don't know	No	Two	0.7	No	Inadequate information	Medical school teachings, Books, Internet
2020-03-20 12:56:12	Agree	Yes	University of Jordan	Female	22	5th years	More than 2000	Urban	Jordanian	No	Amman	No	Infection	Multiple sexual partners, Infection with HPV, Early age of first coitus	Bleeding per vagina, Itching, Post coital bleeding (spotting or bleeding unrelated to menstruation that occurs during or after sexual intercourse)	2 Years	3Years	No	No	Yes	Yes	Sexual	Pap smear	Genital warts	Cervical carcinoma	Don't know	11-29 Years	Yes	Don't know	No	Don't know	Don't know	Yes	Inadequate information	Medical school teachings, Books
2020-03-20 13:01:55	Agree	Yes	University of Jordan	Female	21	5th years	More than 2000	Urban	Jordanian	No	Amman	No	Infection	Multiple sexual partners, Infection with HPV, Poor hygiene, Early age of first coitus, Smoking, Family history of the disease, Old age	No symptoms, Lower abdominal pain, Bleeding per vagina, Fever, Discharge per vagina, Menstrual problems, Itching, Weight loss, Swelling of cervix, Post coital bleeding (spotting or bleeding unrelated to menstruation that occurs during or after sexual intercourse), Anemia	2 Years	3Years	Don't know	Yes	No	Yes	Sexual	Pap smear, PCR (Polymerase chain reaction), Biopsy	Genital warts	Cervical carcinoma	Don't know	11-29 Years	Yes	Yes	Don't know	Don't know	Don't know	Yes	Inadequate information	Medical school teachings, Internet
2020-03-20 13:09:51	Agree	Yes	University of Jordan	Female	23	6th years	501- 1000	Urban	Jordanian	Yes	Amman	No	Infection	Multiple sexual partners, Infection with HPV, Poor hygiene, Early age of first coitus, Smoking, Family history of the disease, Nulliparity (Never married)	No symptoms, Bleeding per vagina, Discharge per vagina, Menstrual problems, Itching, Weight loss, Post coital bleeding (spotting or bleeding unrelated to menstruation that occurs during or after sexual intercourse), Anemia	3 Years	5 Years	No	Yes	Yes	Yes	Sexual	PCR (Polymerase chain reaction)	Genital warts	Cervical carcinoma	Don't know	11-29 Years	Yes	Yes	Yes	Don't know	0.9	Yes	high cost	Medical school teachings, Friends, Books, Social media, Internet
2020-03-20 13:12:02	Agree	Yes	University of Jordan	Male	23	5th years	1001 - 1499	Urban	Jordanian	No	Amman	Yes	Infection	Multiple sexual partners, Infection with HPV, Poor hygiene, Early age of first coitus, Smoking, Family history of the disease, Old age, Contraception (Intrauterine device/oral contraceptives)	No symptoms, Lower abdominal pain, Bleeding per vagina, Itching, Swelling of cervix	3 Years	5 Years	Yes	Yes	Don't know	Yes	Sexual	Blood test, Pap smear, PCR (Polymerase chain reaction), Biopsy	Genital warts	Cervical carcinoma	Don't know	0-10 Years	Yes	Yes	Don't know	Don't know	Don't know	Yes	Inadequate information	Medical school teachings
2020-03-20 13:14:26	Disagree
2020-03-20 13:14:46	Disagree
2020-03-20 13:15:26	Agree	Yes	University of Jordan	Female	22	5th years	More than 2000	Rural	Jordanian	No	Amman	Yes	Genetic	Multiple sexual partners, Infection with HPV, Smoking, Family history of the disease	No symptoms, Bleeding per vagina, Discharge per vagina, Post coital bleeding (spotting or bleeding unrelated to menstruation that occurs during or after sexual intercourse)	3 Years	5 Years	No	No	Yes	Yes	Sexual	Pap smear	Genital warts	Cervical carcinoma	No	11-29 Years	No	Yes	No	Three	Don't know	No	Inadequate information	Medical school teachings
2020-03-20 13:21:26	Agree	Yes	University of Jordan	Female	23	5th years	501- 1000	Urban	Non-Jordanian	No		Yes	Infection	Multiple sexual partners, Infection with HPV, Poor hygiene, Early age of first coitus, Smoking	No symptoms, Bleeding per vagina, Discharge per vagina, Weight loss, Post coital bleeding (spotting or bleeding unrelated to menstruation that occurs during or after sexual intercourse), Anemia	2 Years	5 Years	Don't know	Don't know	Don't know	Yes	Sexual	Pap smear, PCR (Polymerase chain reaction)	Genital warts	Cervical carcinoma	Don't know	11-29 Years	Don't know	Don't know	Don't know	Don't know	Don't know	Yes	high cost, Inadequate information	Medical school teachings
2020-03-20 13:27:17	Agree	Yes	University of Jordan	Male	23	6th years	1001 - 1499	Urban	Jordanian	No	Amman	Yes	Infection	Multiple sexual partners, Infection with HPV, Poor hygiene, Early age of first coitus, Smoking, Family history of the disease, Contraception (Intrauterine device/oral contraceptives)	No symptoms, Lower abdominal pain, Bleeding per vagina, Fever, Discharge per vagina, Menstrual problems, Itching, Weight loss, Post coital bleeding (spotting or bleeding unrelated to menstruation that occurs during or after sexual intercourse), Anemia	3 Years	5 Years	No	Yes	Yes	Yes	Sexual	Pap smear, PCR (Polymerase chain reaction)	Genital warts	Cervical carcinoma	Don't know	11-29 Years	Yes	Don't know	Don't know	Three	Don't know	Yes	high cost, Worry about complications	Medical school teachings, Books
2020-03-20 13:31:34	Agree	Yes	University of Jordan	Female	23	5th years	More than 2000	Urban	Jordanian	No	Amman	No	Infection	Multiple sexual partners, Infection with HPV, Poor hygiene, Early age of first coitus, Smoking, Family history of the disease, Contraception (Intrauterine device/oral contraceptives)	No symptoms, Lower abdominal pain, Bleeding per vagina, Discharge per vagina, Post coital bleeding (spotting or bleeding unrelated to menstruation that occurs during or after sexual intercourse)	3 Years	5 Years	No	Yes	Don't know	Yes	Sexual	Pap smear, Biopsy	Genital warts	Cervical carcinoma	Don't know	11-29 Years	Yes	Don't know	Don't know	One	0.9	No	Worry about complications, Worry about efficacy of vaccine, Inadequate information	Medical school teachings
2020-03-20 13:36:06	Agree	Yes	University of Jordan	Male	22	5th years	1001 - 1499	Urban	Jordanian	No	Madaba	Yes	Infection	Multiple sexual partners, Infection with HPV, Poor hygiene, Early age of first coitus, Smoking, Family history of the disease, Contraception (Intrauterine device/oral contraceptives)	Bleeding per vagina, Discharge per vagina, Menstrual problems, Itching, Swelling of cervix	Don't know	2 Years	Yes	Yes	Yes	Yes	Sexual	Blood test, Pap smear	Cervical carcinoma	Genital warts	Don't know	11-29 Years	Yes	Yes	Yes	Two	0.9	Yes	high cost, Inadequate information	Medical school teachings, Books, Internet
2020-03-20 13:48:44	Agree	Yes	University of Jordan	Male	24	6th years	1001 - 1499	Urban	Non-Jordanian	No		Yes	Infection	Multiple sexual partners, Infection with HPV, Early age of first coitus, Family history of the disease, Contraception (Intrauterine device/oral contraceptives)	Bleeding per vagina, Discharge per vagina, Itching, Post coital bleeding (spotting or bleeding unrelated to menstruation that occurs during or after sexual intercourse)	3 Years	2 Years	Yes	Yes	No	Yes	Sexual	Pap smear, PCR (Polymerase chain reaction), Biopsy	Genital warts	Cervical carcinoma	Don't know	0-10 Years	Don't know	Don't know	Yes	Don't know	0.7	Yes	high cost, Worry about efficacy of vaccine	Medical school teachings, Internet
2020-03-20 13:50:19	Agree	Yes	University of Jordan	Female	24	6th years	1500 - 2000	Urban	Jordanian	No	Almafrq	No	Infection	Multiple sexual partners, Infection with HPV, Early age of first coitus, Smoking, Family history of the disease	Bleeding per vagina	3 Years	5 Years	No	Yes	Yes	Yes	Sexual	PCR (Polymerase chain reaction)	Genital warts	Cervical carcinoma	Yes	11-29 Years	Don't know	No	Don't know	Don't know	0.9	Yes	Inadequate information	Medical school teachings, Internet
2020-03-20 13:53:25	Agree	Yes	University of Jordan	Male	24	6th years	1001 - 1499	Urban	Jordanian	No	Amman	No	Infection	Multiple sexual partners, Infection with HPV, Early age of first coitus, Smoking	No symptoms, Bleeding per vagina, Menstrual problems, Weight loss, Swelling of cervix, Post coital bleeding (spotting or bleeding unrelated to menstruation that occurs during or after sexual intercourse), Anemia	3 Years	3Years	Yes	Yes	Yes	Yes	Sexual	Pap smear, PCR (Polymerase chain reaction)	Genital warts	Cervical carcinoma	Don't know	11-29 Years	No	No	No	One	1	Yes	Inadequate information	Medical school teachings
2020-03-20 14:05:45	Agree	Yes	University of Jordan	Female	26	6th years	Less than 500	Urban	Non-Jordanian	No		No	Infection	Multiple sexual partners, Infection with HPV, Early age of first coitus, Smoking	No symptoms, Lower abdominal pain, Bleeding per vagina, Discharge per vagina, Menstrual problems, Weight loss, Post coital bleeding (spotting or bleeding unrelated to menstruation that occurs during or after sexual intercourse), Anemia	3 Years	3Years	Yes	Yes	Yes	Yes	Sexual	Pap smear, Biopsy	Genital warts	Cervical carcinoma	Don't know	11-29 Years	Yes	No	No	Two	0.9	Yes	Worry about complications	Books
2020-03-20 14:27:33	Agree	Yes	University of Jordan	Female	25	5th years	501- 1000	Urban	Jordanian	No	Amman	Yes	Infection	Multiple sexual partners, Infection with HPV, Early age of first coitus, Smoking, Family history of the disease, Contraception (Intrauterine device/oral contraceptives)	No symptoms, Lower abdominal pain, Bleeding per vagina, Discharge per vagina, Menstrual problems, Weight loss, Swelling of cervix, Post coital bleeding (spotting or bleeding unrelated to menstruation that occurs during or after sexual intercourse), Anemia	3 Years	5 Years	No	Yes	Yes	Yes	Sexual	Pap smear, PCR (Polymerase chain reaction)	Genital warts	Cervical carcinoma	No	11-29 Years	Yes	Yes	Yes	Two	0.9	Don't know	high cost, Worry about complications	Medical school teachings, Internet
2020-03-20 14:37:00	Agree	Yes	University of Jordan	Female	24	6th years	More than 2000	Urban	Jordanian	No	Amman	Yes	Infection	Multiple sexual partners, Infection with HPV, Early age of first coitus, Smoking, Family history of the disease	No symptoms, Lower abdominal pain, Bleeding per vagina, Itching, Weight loss, Swelling of cervix, Post coital bleeding (spotting or bleeding unrelated to menstruation that occurs during or after sexual intercourse), Anemia	3 Years	3Years	No	Yes	Yes	Yes	Sexual	Pap smear, PCR (Polymerase chain reaction), Biopsy	Genital warts	Cervical carcinoma	Yes	11-29 Years	Yes	Yes	No	One	0.9	Yes	high cost	Medical school teachings
2020-03-20 14:39:04	Agree	Yes	University of Jordan	Male	23	6th years	1500 - 2000	Urban	Non-Jordanian	No		Yes	Infection	Multiple sexual partners, Infection with HPV, Early age of first coitus, Smoking, Family history of the disease, Contraception (Intrauterine device/oral contraceptives), Nulliparity (Never married)	Lower abdominal pain, Bleeding per vagina, Discharge per vagina, Weight loss, Swelling of cervix, Post coital bleeding (spotting or bleeding unrelated to menstruation that occurs during or after sexual intercourse)	3 Years	4 Years	No	No	Yes	Yes	Sexual	Pap smear	Genital warts	Cervical carcinoma	Yes	11-29 Years	Don't know	Don't know	Don't know	Don't know	0.9	Yes	high cost	Medical school teachings
2020-03-20 14:43:58	Agree	Yes	University of Jordan	Female	24	6th years	More than 2000	Urban	Jordanian	No	Ma'an	Yes	Infection	Multiple sexual partners, Infection with HPV, Early age of first coitus, Smoking, Family history of the disease, Old age	No symptoms, Lower abdominal pain, Bleeding per vagina, Discharge per vagina, Menstrual problems, Itching, Weight loss, Swelling of cervix, Post coital bleeding (spotting or bleeding unrelated to menstruation that occurs during or after sexual intercourse), Anemia	4 Years	3Years	Don't know	Yes	Yes	Yes	Sexual	Pap smear, PCR (Polymerase chain reaction)	Don't know	Don't know	Don't know	11-29 Years	No	Yes	No	Don't know	Don't know	Yes	Inadequate information	Medical school teachings, Social media
2020-03-20 15:01:25	Agree	Yes	University of Jordan	Female	23	6th years	More than 2000	Urban	Jordanian	No	Amman	Yes	Infection	Multiple sexual partners, Infection with HPV, Smoking, Family history of the disease	No symptoms, Bleeding per vagina, Discharge per vagina, Itching, Weight loss, Swelling of cervix, Post coital bleeding (spotting or bleeding unrelated to menstruation that occurs during or after sexual intercourse), Anemia	Don't know	Don't know	No	No	Yes	Yes	Sexual	Blood test, Pap smear, PCR (Polymerase chain reaction), Biopsy	Genital warts	Cervical carcinoma	Don't know	11-29 Years	Yes	Don't know	Don't know	Don't know	Don't know	No	Inadequate information	Medical school teachings
2020-03-20 15:10:00	Agree	Yes	University of Jordan	Male	23	6th years	More than 2000	Urban	Non-Jordanian	No		No	Infection	Multiple sexual partners, Infection with HPV, Early age of first coitus, Smoking, Family history of the disease, Contraception (Intrauterine device/oral contraceptives)	Bleeding per vagina, Discharge per vagina, Menstrual problems, Weight loss, Swelling of cervix, Post coital bleeding (spotting or bleeding unrelated to menstruation that occurs during or after sexual intercourse)	3 Years	5 Years	No	Yes	Yes	Yes	Sexual	Blood test, Pap smear, Biopsy	Genital warts	Cervical carcinoma	Yes	11-29 Years	Yes	No	Yes	Two	0.9	Yes	high cost, Inadequate information	Medical school teachings, Books
2020-03-20 15:34:29	Agree	Yes	University of Jordan	Female	23	6th years	501- 1000	Urban	Jordanian	No	Amman	No	Infection	Multiple sexual partners, Infection with HPV, Family history of the disease	Bleeding per vagina, Menstrual problems, Post coital bleeding (spotting or bleeding unrelated to menstruation that occurs during or after sexual intercourse), Anemia	3 Years	5 Years	No	Yes	Yes	Yes	Sexual	Pap smear, PCR (Polymerase chain reaction)	Plantar warts	Cervical carcinoma	Don't know	30-50 Years	Yes	Don't know	Don't know	Don't know	Don't know	Don't know	high cost, Worry about complications, Worry about efficacy of vaccine, Inadequate information	Medical school teachings, Internet
2020-03-20 16:33:06	Agree	Yes	University of Jordan	Female	23	5th years	More than 2000	Urban	Jordanian	No	Amman	No	Infection	Multiple sexual partners, Infection with HPV, Early age of first coitus, Smoking, Family history of the disease	Lower abdominal pain, Bleeding per vagina, Discharge per vagina, Menstrual problems, Weight loss, Swelling of cervix, Post coital bleeding (spotting or bleeding unrelated to menstruation that occurs during or after sexual intercourse), Anemia	3 Years	Don't know	No	Yes	Yes	Yes	Sexual	Blood test, PCR (Polymerase chain reaction)	Genital warts	Cervical carcinoma	Yes	11-29 Years	Don't know	Yes	No	Don't know	0.9	Yes	high cost, Worry about complications, Inadequate information	Medical school teachings
2020-03-20 17:52:10	Agree	Yes	University of Jordan	Male	22	5th years	1500 - 2000	Urban	Jordanian	No	Amman	Yes	Genetic	Infection with HPV, Smoking, Family history of the disease, Old age, Contraception (Intrauterine device/oral contraceptives), Nulliparity (Never married)	Lower abdominal pain, Menstrual problems, Weight loss, Post coital bleeding (spotting or bleeding unrelated to menstruation that occurs during or after sexual intercourse), Anemia	Don't know	2 Years	No	Yes	Yes	Yes	Oro-fecal	PCR (Polymerase chain reaction)	Genital warts	Cervical carcinoma	Don't know	11-29 Years	Don't know	Yes	Don't know	Don't know	0.7	Yes	high cost, Worry about complications	Medical school teachings
2020-03-20 19:49:36	Agree	Yes	University of Jordan	Female	23	6th years	501- 1000	Urban	Jordanian	No	Salt	No	Infection	Multiple sexual partners, Infection with HPV, Poor hygiene, Family history of the disease, Contraception (Intrauterine device/oral contraceptives), Nulliparity (Never married)	No symptoms, Lower abdominal pain, Bleeding per vagina, Discharge per vagina, Swelling of cervix, Post coital bleeding (spotting or bleeding unrelated to menstruation that occurs during or after sexual intercourse), Anemia	3 Years	5 Years	Yes	Yes	Yes	Yes	Sexual	Pap smear, Biopsy	Genital warts	Cervical carcinoma	Don't know	11-29 Years	Don't know	Yes	Yes	One	0.9	Yes	high cost	Medical school teachings, Books, Internet
2020-03-22 00:29:54	Agree	Yes	University of Jordan	Female	22	5th years	1500 - 2000	Urban	Jordanian	No	Amman	No	Infection	Multiple sexual partners, Infection with HPV, Poor hygiene, Early age of first coitus, Smoking, Family history of the disease, Old age, Contraception (Intrauterine device/oral contraceptives)	No symptoms, Lower abdominal pain, Bleeding per vagina, Fever, Discharge per vagina, Menstrual problems, Itching, Weight loss, Swelling of cervix, Post coital bleeding (spotting or bleeding unrelated to menstruation that occurs during or after sexual intercourse), Anemia	2 Years	3Years	No	Yes	Yes	No	Sexual	Pap smear	Genital warts	Cervical carcinoma	Yes	11-29 Years	Don't know	No	Yes	Don't know	Don't know	Don't know	Inadequate information	Medical school teachings, Books
2020-03-22 18:53:48	Agree	Yes	Yarmouk University	Female	23	4th years	501- 1000	Urban	Jordanian	No	Irbid	Yes	Infection	Infection with HPV, Smoking, Family history of the disease	No symptoms, Fever, Discharge per vagina, Menstrual problems	5 Years	3Years	No	Yes	Yes	Yes	Sexual	Pap smear	Genital warts	Cervical carcinoma	No	11-29 Years	Yes	No	Yes	Three	0.7	Yes	Inadequate information	Medical school teachings
2020-03-22 19:30:20	Agree	Yes	Yarmouk University	Male	23	6th years	1001 - 1499	Urban	Jordanian	No	Irbid	Yes	Infection	Multiple sexual partners, Infection with HPV, Early age of first coitus, Smoking, Family history of the disease, Nulliparity (Never married)	No symptoms, Lower abdominal pain, Bleeding per vagina, Discharge per vagina, Menstrual problems, Swelling of cervix, Post coital bleeding (spotting or bleeding unrelated to menstruation that occurs during or after sexual intercourse), Anemia	2 Years	5 Years	Yes	Yes	Don't know	Yes	Sexual	PCR (Polymerase chain reaction)	Genital warts	Cervical carcinoma	Don't know	11-29 Years	Yes	Yes	Don't know	Four	Don't know	Yes	high cost	Medical school teachings, Internet
2020-03-22 19:30:41	Agree	Yes	Yarmouk University	Female	23	6th years	501- 1000	Urban	Jordanian	No	Irbid	No	Infection	Multiple sexual partners, Infection with HPV, Early age of first coitus, Smoking, Contraception (Intrauterine device/oral contraceptives)	No symptoms, Bleeding per vagina, Discharge per vagina, Weight loss, Post coital bleeding (spotting or bleeding unrelated to menstruation that occurs during or after sexual intercourse)	3 Years	5 Years	No	Yes	Don't know	Yes	Sexual	Blood test, Pap smear, Biopsy	Genital warts	Cervical carcinoma	No	11-29 Years	Yes	No	Yes	Three	0.7	Yes	high cost, Inadequate information	Medical school teachings, Internet
2020-03-22 20:28:43	Agree	Yes	Yarmouk University	Male	25	6th years	Less than 500	Urban	Jordanian	No	alramtha	No	Infection	Multiple sexual partners, Infection with HPV, Early age of first coitus, Smoking	No symptoms, Bleeding per vagina, Weight loss, Post coital bleeding (spotting or bleeding unrelated to menstruation that occurs during or after sexual intercourse)	2 Years	3Years	No	Yes	Don't know	Yes	Sexual	Pap smear, PCR (Polymerase chain reaction), Biopsy	Genital warts	Cervical carcinoma	Don't know	11-29 Years	Don't know	Yes	Don't know	Three	0.9	Yes	Inadequate information	Medical school teachings
2020-03-22 21:33:56	Agree	Yes	Yarmouk University	Female	22	5th years	1001 - 1499	Urban	Jordanian	No	Irbid	Yes	Infection	Multiple sexual partners, Infection with HPV, Smoking, Family history of the disease, Contraception (Intrauterine device/oral contraceptives), Nulliparity (Never married)	No symptoms, Lower abdominal pain, Bleeding per vagina, Menstrual problems, Weight loss, Swelling of cervix, Post coital bleeding (spotting or bleeding unrelated to menstruation that occurs during or after sexual intercourse), Anemia	3 Years	5 Years	No	Yes	Yes	Yes	Sexual	Pap smear	Genital warts	Cervical carcinoma	Don't know	11-29 Years	Yes	Yes	Yes	Three	0.7	Yes	high cost, Inadequate information	Medical school teachings, Books
2020-03-22 21:58:59	Agree	Yes	Yarmouk University	Female	22	5th years	501- 1000	Urban	Jordanian	No	Irbid	Yes	Infection	Multiple sexual partners, Infection with HPV, Smoking	No symptoms	3 Years	5 Years	No	Yes	Yes	Yes	Don't know	Pap smear	Plantar warts	Cervical carcinoma	Don't know	11-29 Years	Yes	Yes	Don't know	Don't know	Don't know	Yes	Inadequate information	Internet
2020-03-22 22:39:23	Agree	Yes	Yarmouk University	Female	23	5th years	1001 - 1499	Urban	Jordanian	No	Amman	Yes	Genetic	Multiple sexual partners, Infection with HPV, Smoking, Family history of the disease, Old age	Lower abdominal pain, Bleeding per vagina, Discharge per vagina, Menstrual problems, Itching, Weight loss, Swelling of cervix	Don't know	5 Years	Don't know	No	Yes	Yes	Sexual	Pap smear	Genital warts	Genital warts	Don't know	30-50 Years	Don't know	Yes	No	Don't know	Don't know	Yes	high cost, Inadequate information	Medical school teachings
2020-03-22 22:55:07	Agree	Yes	Yarmouk University	Female	21	4th years	501- 1000	Urban	Jordanian	No	Salt	Yes	Infection	Multiple sexual partners, Infection with HPV, Early age of first coitus, Smoking, Contraception (Intrauterine device/oral contraceptives)	No symptoms, Lower abdominal pain, Bleeding per vagina, Discharge per vagina, Weight loss, Swelling of cervix, Post coital bleeding (spotting or bleeding unrelated to menstruation that occurs during or after sexual intercourse)	3 Years	3Years	No	Yes	Yes	Yes	Sexual	Pap smear, Biopsy	Genital warts	Cervical carcinoma	Don't know	11-29 Years	Yes	Yes	No	Three	0.9	Yes	high cost	Medical school teachings, Internet
2020-03-23 19:43:14	Agree	Yes	Hashemite University	Male	20	3th years	501- 1000	Urban	Jordanian	No	Irbid	No	Infection	Multiple sexual partners, Infection with HPV	Bleeding per vagina, Discharge per vagina, Itching, Swelling of cervix	4 Years	2 Years	No	Yes	Don't know	Yes	Sexual	Pap smear, PCR (Polymerase chain reaction)	Cervical carcinoma	Cervical carcinoma	Yes	11-29 Years	Yes	Don't know	Don't know	Three	0.9	Yes	Inadequate information	Medical school teachings
2020-03-23 19:50:13	Agree	Yes	Hashemite University	Male	23	5th years	More than 2000	Urban	Jordanian	No	Alkarak	No	Infection	Multiple sexual partners, Infection with HPV, Poor hygiene, Early age of first coitus, Smoking, Family history of the disease	Lower abdominal pain, Bleeding per vagina, Discharge per vagina, Weight loss, Post coital bleeding (spotting or bleeding unrelated to menstruation that occurs during or after sexual intercourse), Anemia	3 Years	3Years	No	Don't know	Yes	Yes	Sexual	Pap smear, Biopsy	Genital warts	Cervical carcinoma	Don't know	11-29 Years	No	Don't know	Don't know	Don't know	Don't know	Don't know	Inadequate information	Medical school teachings
2020-03-23 19:58:30	Agree	Yes	Hashemite University	Male	23	5th years	501- 1000	Urban	Jordanian	No	Ajl'on	No	Infection	Multiple sexual partners, Infection with HPV, Poor hygiene, Smoking, Family history of the disease, Old age	Bleeding per vagina, Menstrual problems, Itching, Weight loss, Anemia	Don't know	Don't know	Yes	Yes	Yes	Yes	Sexual	Pap smear	Genital warts	Plantar warts	Yes	30-50 Years	No	No	Yes	One	0.5	Yes	Inadequate information	Internet
2020-03-23 20:15:16	Agree	Yes	Hashemite University	Male	21	3th years	501- 1000	Urban	Jordanian	No	Amman	No	Infection	Multiple sexual partners, Infection with HPV, Early age of first coitus	Bleeding per vagina, Discharge per vagina, Swelling of cervix, Post coital bleeding (spotting or bleeding unrelated to menstruation that occurs during or after sexual intercourse)	3 Years	3Years	No	Yes	Yes	Yes	Sexual	Pap smear	Genital warts	Cervical carcinoma	Don't know	11-29 Years	Yes	Don't know	Don't know	Don't know	0.7	Yes	Inadequate information	Books
2020-03-23 20:26:06	Agree	Yes	Hashemite University	Male	22	4th years	1001 - 1499	Rural	Jordanian	No	Azarqa	No	Infection	Multiple sexual partners, Infection with HPV, Poor hygiene, Family history of the disease	Lower abdominal pain, Fever, Discharge per vagina, Itching, Swelling of cervix	3 Years	5 Years	Yes	Yes	Yes	Yes	Sexual	Pap smear	Plantar warts	Cervical carcinoma	Yes	11-29 Years	Don't know	No	No	One	0.9	Yes	Inadequate information	Medical school teachings
2020-03-23 20:32:38	Agree	Yes	Hashemite University	Male	21	4th years	Less than 500	Rural	Jordanian	No	Azarqa	Yes	Genetic	Multiple sexual partners, Infection with HPV, Smoking, Family history of the disease, Contraception (Intrauterine device/oral contraceptives)	Lower abdominal pain, Bleeding per vagina, Fever, Discharge per vagina, Menstrual problems, Itching, Weight loss, Swelling of cervix, Post coital bleeding (spotting or bleeding unrelated to menstruation that occurs during or after sexual intercourse)	5 Years	2 Years	No	No	Yes	No	Sexual	Pap smear, Biopsy	Genital warts	Cervical carcinoma	No	11-29 Years	Yes	Yes	No	Don't know	0.7	Yes	high cost, Worry about efficacy of vaccine	Medical school teachings, Internet
2020-03-23 20:41:10	Agree	Yes	Hashemite University	Male	26	6th years	1500 - 2000	Urban	Jordanian	No	Amman	Yes	Infection	Multiple sexual partners, Infection with HPV, Poor hygiene, Early age of first coitus, Smoking, Family history of the disease, Old age, Contraception (Intrauterine device/oral contraceptives)	No symptoms, Lower abdominal pain, Discharge per vagina, Menstrual problems, Weight loss, Post coital bleeding (spotting or bleeding unrelated to menstruation that occurs during or after sexual intercourse)	3 Years	5 Years	No	Yes	Yes	Yes	Sexual	Pap smear, PCR (Polymerase chain reaction), Biopsy	Genital warts	Cervical carcinoma	Yes	11-29 Years	Yes	Don't know	Yes	Three	0.7	Don't know	high cost, Worry about efficacy of vaccine, Inadequate information	Medical school teachings
2020-03-23 21:01:28	Agree	Yes	Hashemite University	Male	21	4th years	501- 1000	Urban	Jordanian	Yes	Amman	No	Genetic	Multiple sexual partners, Infection with HPV, Poor hygiene, Smoking, Family history of the disease, Old age, Contraception (Intrauterine device/oral contraceptives)	Bleeding per vagina, Discharge per vagina, Weight loss, Swelling of cervix, Anemia	3 Years	2 Years	Don't know	Yes	Yes	Yes	Environmental	Pap smear, Biopsy	Cervical carcinoma	Genital warts	No	11-29 Years	No	Yes	Yes	Don't know	Don't know	Yes	Worry about complications, Inadequate information	Medical school teachings
2020-03-23 21:13:09	Agree	Yes	Hashemite University	Male	20	3th years	1500 - 2000	Urban	Jordanian	No	Amman	No	Infection	Multiple sexual partners, Infection with HPV, Early age of first coitus, Family history of the disease, Contraception (Intrauterine device/oral contraceptives), Nulliparity (Never married)	Bleeding per vagina, Discharge per vagina, Menstrual problems, Itching, Weight loss, Anemia	2 Years	Don't know	No	Don't know	Yes	Yes	Sexual	Pap smear, PCR (Polymerase chain reaction)	Plantar warts	Cervical carcinoma	Yes	0-10 Years	Don't know	Don't know	Yes	Don't know	0.7	No	high cost, Worry about complications, Inadequate information	Medical school teachings
2020-03-23 21:29:10	Agree	Yes	Hashemite University	Male	20	3th years	501- 1000	Urban	Jordanian	No	Salt	Yes	Infection	Multiple sexual partners, Infection with HPV, Smoking	Lower abdominal pain, Bleeding per vagina, Weight loss, Post coital bleeding (spotting or bleeding unrelated to menstruation that occurs during or after sexual intercourse), Anemia	Don't know	Don't know	Yes	Yes	Yes	Yes	Sexual	Pap smear, PCR (Polymerase chain reaction), Biopsy	Genital warts	Cervical carcinoma	Don't know	11-29 Years	No	Yes	No	Don't know	Don't know	Yes	high cost, Inadequate information	Medical school teachings
2020-03-23 21:47:05	Agree	Yes	Yarmouk University	Male	21	5th years	1001 - 1499	Urban	Jordanian	No	Irbid	Yes	Genetic	Smoking, Family history of the disease, Old age	Bleeding per vagina, Discharge per vagina, Menstrual problems	5 Years	2 Years	No	Yes	Yes	No	Sexual	Blood test, Pap smear	Cervical carcinoma	Genital warts	Yes	0-10 Years	No	Yes	Yes	Don't know	0.5	No	high cost	Medical school teachings
2020-03-23 21:48:12	Agree	Yes	Yarmouk University	Male	24	5th years	1001 - 1499	Urban	Jordanian	No	Ajl'on	Yes	Infection	Multiple sexual partners, Infection with HPV, Poor hygiene, Early age of first coitus, Smoking, Family history of the disease, Old age, Contraception (Intrauterine device/oral contraceptives)	Lower abdominal pain, Menstrual problems, Itching, Swelling of cervix	Don't know	Don't know	Don't know	Don't know	Don't know	Don't know	Don't know	Don't know	Don't know	Don't know	No	11-29 Years	Yes	No	Yes	One	Don't know	Don't know	Worry about complications	Social media
2020-03-23 22:09:46	Agree	Yes	Yarmouk University	Female	23	5th years	1500 - 2000	Urban	Jordanian	No	Irbid	No	Infection	Multiple sexual partners, Infection with HPV, Poor hygiene, Smoking, Family history of the disease	No symptoms	Don't know	2 Years	Yes	Yes	Yes	Yes	Sexual	Pap smear	Genital warts	Cervical carcinoma	Don't know	11-29 Years	Don't know	Don't know	Don't know	Don't know	0.9	No	high cost, Inadequate information	Medical school teachings
2020-03-23 22:11:39	Agree	Yes	Yarmouk University	Female	22	5th years	501- 1000	Urban	Jordanian	No	Irbid	Yes	Genetic	Old age	Bleeding per vagina	Don't know	Don't know	No	No	Don't know	Don't know	Sexual	Blood test, Pap smear	Cervical carcinoma	Plantar warts	Yes	11-29 Years	Yes	No	No	Don't know	0.7	No	Worry about efficacy of vaccine	Books
2020-03-23 22:26:47	Agree	Yes	Yarmouk University	Male	22	5th years	1500 - 2000	Urban	Jordanian	No	Irbid	Yes	Infection	Multiple sexual partners, Infection with HPV, Poor hygiene, Early age of first coitus, Smoking	No symptoms, Bleeding per vagina, Discharge per vagina, Menstrual problems, Itching, Swelling of cervix, Post coital bleeding (spotting or bleeding unrelated to menstruation that occurs during or after sexual intercourse), Anemia	3 Years	2 Years	No	No	Yes	Yes	Sexual	PCR (Polymerase chain reaction)	Genital warts	Cervical carcinoma	No	11-29 Years	Yes	Yes	Yes	Don't know	Don't know	No	Worry about complications, Worry about efficacy of vaccine, Inadequate information	Medical school teachings, Books, Internet
2020-03-23 22:39:05	Agree	Yes	Yarmouk University	Male	25	5th years	More than 2000	Urban	Non-Jordanian	No		No	Genetic	Infection with HPV, Smoking, Family history of the disease, Old age, Contraception (Intrauterine device/oral contraceptives)	No symptoms, Fever, Weight loss, Swelling of cervix, Anemia	5 Years	3Years	No	Don't know	Don't know	Yes	Sexual	PCR (Polymerase chain reaction)	Plantar warts	Genital warts	Don't know	11-29 Years	Don't know	Yes	No	Don't know	Don't know	Don't know	Worry about complications, Inadequate information	Medical school teachings
2020-03-23 22:44:06	Agree	Yes	Yarmouk University	Male	22	5th years	1001 - 1499	Urban	Jordanian	No	Amman	Yes	Infection	Multiple sexual partners, Infection with HPV, Poor hygiene, Early age of first coitus, Smoking	No symptoms, Lower abdominal pain, Bleeding per vagina, Fever	3 Years	2 Years	No	No	Yes	Yes	Sexual	Don't know	Genital warts	Genital warts	Yes	11-29 Years	Yes	Yes	Yes	Two	0.5	Yes	Inadequate information	Medical school teachings
2020-03-23 23:04:11	Agree	Yes	Hashemite University	Male	22	5th years	501- 1000	Urban	Jordanian	Yes	Amman	Yes	Infection	Multiple sexual partners, Infection with HPV, Poor hygiene, Early age of first coitus, Smoking, Family history of the disease, Contraception (Intrauterine device/oral contraceptives)	Lower abdominal pain, Bleeding per vagina, Discharge per vagina, Menstrual problems, Weight loss, Post coital bleeding (spotting or bleeding unrelated to menstruation that occurs during or after sexual intercourse)	3 Years	5 Years	Don't know	Don't know	Don't know	Yes	Sexual	PCR (Polymerase chain reaction)	Don't know	Don't know	Yes	0-10 Years	Yes	No	Don't know	Don't know	Don't know	Yes	high cost, Worry about complications, Worry about efficacy of vaccine, Inadequate information	Medical school teachings
2020-03-23 23:11:36	Agree	Yes	Yarmouk University	Female	24	5th years	501- 1000	Urban	Jordanian	No	Irbid	Yes	Infection	Multiple sexual partners, Infection with HPV, Smoking, Family history of the disease, Old age	No symptoms, Bleeding per vagina, Post coital bleeding (spotting or bleeding unrelated to menstruation that occurs during or after sexual intercourse), Anemia	3 Years	5 Years	No	No	Don't know	Yes	Sexual	Pap smear, Biopsy	Genital warts	Cervical carcinoma	Don't know	11-29 Years	Yes	Yes	Yes	Three	0.9	No	Inadequate information	Medical school teachings
2020-03-23 23:20:50	Agree	Yes	Yarmouk University	Female	22	5th years	1001 - 1499	Rural	Jordanian	No	Irbid	No	Genetic	Multiple sexual partners, Infection with HPV, Poor hygiene, Early age of first coitus, Smoking, Family history of the disease, Old age, Contraception (Intrauterine device/oral contraceptives), Nulliparity (Never married)	Bleeding per vagina, Menstrual problems, Weight loss, Swelling of cervix, Post coital bleeding (spotting or bleeding unrelated to menstruation that occurs during or after sexual intercourse)	5 Years	2 Years	No	Yes	Yes	Yes	Sexual	PCR (Polymerase chain reaction)	Genital warts	Cervical carcinoma	Don't know	30-50 Years	Don't know	Don't know	Don't know	Three	Don't know	No	Inadequate information	Medical school teachings
2020-03-23 23:43:25	Agree	Yes	Yarmouk University	Female	23	5th years	1500 - 2000	Urban	Jordanian	No	Irbid	Yes	Infection	Multiple sexual partners, Infection with HPV, Poor hygiene, Early age of first coitus, Smoking, Family history of the disease, Contraception (Intrauterine device/oral contraceptives)	No symptoms, Bleeding per vagina, Discharge per vagina, Post coital bleeding (spotting or bleeding unrelated to menstruation that occurs during or after sexual intercourse)	3 Years	5 Years	No	Yes	No	Yes	Sexual	Pap smear, PCR (Polymerase chain reaction), Biopsy	Genital warts	Cervical carcinoma	Yes	11-29 Years	Yes	No	No	Two	1	Yes	Inadequate information	Medical school teachings
2020-03-24 00:21:29	Agree	Yes	Hashemite University	Male	20	3th years	501- 1000	Urban	Jordanian	No	Amman	No	Infection	Multiple sexual partners, Infection with HPV, Poor hygiene, Early age of first coitus, Smoking	No symptoms, Lower abdominal pain, Bleeding per vagina, Discharge per vagina, Menstrual problems, Weight loss, Swelling of cervix, Post coital bleeding (spotting or bleeding unrelated to menstruation that occurs during or after sexual intercourse), Anemia	2 Years	3Years	Don't know	Yes	Yes	Yes	Sexual	Pap smear, PCR (Polymerase chain reaction), Biopsy	Genital warts	Cervical carcinoma	Yes	11-29 Years	Yes	Yes	Don't know	Don't know	0.7	Yes	Inadequate information	Internet
2020-03-24 14:04:31	Agree	Yes	Yarmouk University	Male	22	4th years	501- 1000	Rural	Jordanian	No	Irbid	Yes	Environmental	Infection with HPV, Early age of first coitus, Smoking, Family history of the disease, Old age, Contraception (Intrauterine device/oral contraceptives)	Bleeding per vagina, Discharge per vagina, Menstrual problems, Itching, Weight loss, Anemia	Don't know	Don't know	No	Yes	Yes	Yes	Sexual	Pap smear	Don't know	Cervical carcinoma	Yes	0-10 Years	Yes	Yes	Don't know	Don't know	Don't know	Yes	high cost, Worry about complications, Worry about efficacy of vaccine, Inadequate information	Medical school teachings, Social media, Internet
2020-03-24 14:54:26	Agree	Yes	Yarmouk University	Female	23	5th years	More than 2000	Urban	Jordanian	No	Amman	No	Genetic	Multiple sexual partners, Infection with HPV, Smoking, Family history of the disease, Contraception (Intrauterine device/oral contraceptives)	Lower abdominal pain, Bleeding per vagina, Itching, Weight loss, Swelling of cervix, Post coital bleeding (spotting or bleeding unrelated to menstruation that occurs during or after sexual intercourse)	5 Years	2 Years	No	No	Yes	Don't know	Blood	Blood test	Genital warts	Cervical carcinoma	Yes	30-50 Years	Yes	Yes	No	Three	Don't know	Don't know	high cost, Worry about efficacy of vaccine	Medical school teachings
